# Supplementary material for: Carbene-catalyzed enal γ-carbon addition to α-ketophosphonates for enantioselective access to bioactive 2-pyranylphosphonates
Source: Royal Society of Chemistry journal article supplement (doi:10.1039/c8cc03017k), 2018-01-01
Supplement: c8cc03017k1.pdf [file c8cc03017k1.pdf]

## Supporting Information

# Carbene-catalyzed enal $\gamma$ -carbon addition to $\alpha$ -ketophosphonates for enantioselective access to bioactive 2-Pyranylphosphonates

Jun Sun,<sup>a</sup> Fangcheng He,<sup>a</sup> Zhongyao Wang,<sup>a</sup> Dingwu Pan,<sup>a</sup> Pengcheng Zheng,<sup>a</sup>  
Chengli Mou,<sup>c</sup> Zhichao Jin,<sup>\*a</sup> Yonggui Robin Chi<sup>\*a,b</sup>

<sup>a</sup>Laboratory Breeding Base of Green Pesticide and Agricultural Bioengineering, Key Laboratory of Green Pesticide and Agricultural Bioengineering, Ministry of Education, Guizhou University, Huaxi District, Guiyang 550025, China.

<sup>b</sup>Division of Chemistry & Biological Chemistry, School of Physical & Mathematical Sciences, Nanyang Technological University, Singapore 637371, Singapore

<sup>c</sup>School of Pharmacy, Guiyang College of Traditional Chinese Medicine, Huaxi District, Guiyang 550025, China.

E-Mail: [robinchi@ntu.edu.sg](mailto:robinchi@ntu.edu.sg)

|                                                                             |    |
|-----------------------------------------------------------------------------|----|
| I . General information.....                                                | 2  |
| II . Preparation of substrates.....                                         | 3  |
| III. Reaction conditions optimization .....                                 | 5  |
| IV. General procedure. ....                                                 | 6  |
| V . Stereochemistry determination via X-ray crystallographic analysis ..... | 6  |
| VI. <i>In vitro</i> antibacterial bioassay.....                             | 7  |
| VII. Antiviral biological assay .....                                       | 7  |
| VIII. Characterization of intermediates & products.....                     | 11 |
| IX. NMR spectra of intermediates & products.....                            | 22 |
| X . HPLC spectra of products.....                                           | 68 |

## I .General information

Commercially available materials purchased from J&K or Aladdin were used as received. THF was distilled over sodium. Unless otherwise specified, all reactions were carried out under an atmosphere of nitrogen in 10 mL dry Schlenk tube. Proton nuclear magnetic resonance ( $^1\text{H}$  NMR) spectra were recorded on a Bruker (400 MHz) spectrometer or on a JEOL-ECX-500 (500 MHz) spectrometer. Chemical shifts were recorded in parts per million (ppm,  $\delta$ ) relative to tetramethylsilane ( $\delta$  0.00) or chloroform ( $\delta$  = 7.26, singlet).  $^1\text{H}$  NMR splitting patterns are designated as singlet (s), doublet (d), triplet (t), quartet (q), dd (doublet of doublets); m (multiplets), and etc. All first-order splitting patterns were assigned on the basis of the appearance of the multiplet. Splitting patterns that could not be easily interpreted are designated as multiplet (m) or broad (br). Carbon nuclear magnetic resonance ( $^{13}\text{C}$  NMR) spectra were recorded on a Bruker (101 MHz) spectrometer or on a JEOL-ECX-500 (126 MHz) spectrometer. Fluorine ( $^{19}\text{F}$ ) nuclear magnetic resonance ( $^{19}\text{F}$  NMR) spectra were recorded on a Bruker (376 MHz) spectrometer or on a JEOL-ECX-500 (471 MHz) spectrometer. Phosphorus ( $^{31}\text{P}$ ) nuclear magnetic resonance ( $^{31}\text{P}$  NMR) spectra were recorded on a Bruker (162 MHz) spectrometer or on a JEOL-ECX-500 (202MHz) spectrometer. The melting points (m.p.) of the title compounds were determined when left untouched on an XT-4-MP apparatus from Beijing Tech. Instrument Co. (Beijing, China). High resolution mass spectral analysis (HRMS) was performed on a quadrupole/electrostatic field orbitrap mass spectrometer. Absolute configuration of the products was determined by X-ray crystallography. HPLC analyses were measured on Waters systems with Empower3 system controller, Alliance column heater, and 2998 Diode Array Waters 2489 UV/Vis detector. Chiralcel brand chiral columns from Daicel Chemical Industries were used with models AD-H, or OD-H in 4.6 x 250 mm size. The racemic products used to determine the er values were synthesized using racemic catalyst. Optical rotations were measured on a Insmark IP-digi Polarimeter in a 1 dm cuvette at 26 °C. The concentration (c) is given in g/100 mL. Analytical thin-layer chromatography (TLC) was carried out on Merck 60 F254 pre-coated silica gel plate (0.2 mm thickness). Visualization was performed using a UV lamp.

## II. Preparation of substrates

### 1. General procedure for the preparation of acyl phosphonate substrates

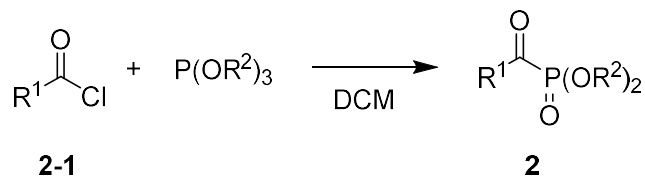

All acyl phosphonates were synthesized using a published Arbuzov reaction procedure.<sup>1</sup> Into an dried 100 mL round bottom flask equipped with a magnetic stir bar, the benzoyl chloride derivative (7 mmol, 1 equiv) was dissolved in CH<sub>2</sub>Cl<sub>2</sub> (45 mL). Then, the reaction was purged with N<sub>2</sub> and triethylphosphite (7.7 mmol, 1.1 equiv) was added dropwise. After 24 h stirring, the reaction was concentrated under reduced pressure. The oil obtained was purified by vacuum distillation and stocked in a nitrogen-filled drybox.

### 2. Preparation of 1-(4-(1-tosyl-1H-indol-3-yl)phenyl)ethan-1-one (1m-3)

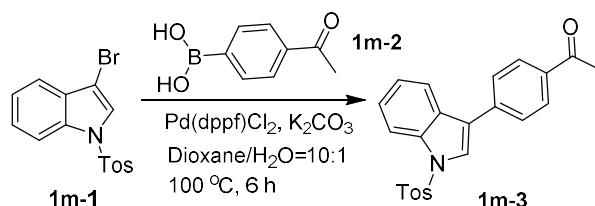

To a solution of **1m-1** (3.6 g, 10.3 mmol) and **1m-2** (2.0 g, 12.3 mmol) in Dioxane/H<sub>2</sub>O (10: 1, 40 mL) was added K<sub>2</sub>CO<sub>3</sub> (2.85 g, 25.6 mmol) and Pd(dppf)Cl<sub>2</sub> (400 mg, 0.55 mmol), the mixture was evacuated and refilled with N<sub>2</sub>, then the mixture was stirred at 100 °C for 6 h. monitored by TLC, the mixture was filtered and the filtrate was removed under reduced pressure and the residue was purified via column chromatography on silica gel with Hexane/EtOAc (10: 1) as eluent to afford the product **1m-3**.

### 3. Preparation of enal substrates

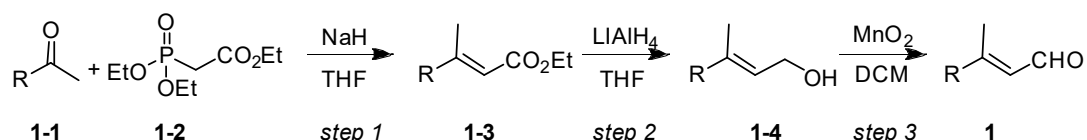

The enal substrates were prepared and characterized according to the known procedure as briefed below.<sup>2,3</sup>

Step 1: To a 100 mL round bottom flask containing NaH (20 mmol, 60% mineral dispersion) and anhydrous THF (40 mL) at 0 °C was added triethyl phosphonoacetate (21.5 mmol) dropwise via an addition funnel. The reaction mixture was naturally warmed to rt, followed by a dropwise addition of a acetophenone solution (13 mmol, in 20 mL

anhydrous THF). The reaction mixture was stirred for 12 h, and then poured into a separating funnel containing water. The organic layer was collected, and the aqueous layer was extracted with diethyl ether (2 × 50 mL). The combined organic layers were dried over Na<sub>2</sub>SO<sub>4</sub>, filtered, and concentrated under reduced pressure. The crude residue was subjected to flash chromatography (Hexanes/EtOAc: 95/5) to afford the corresponding  $\alpha,\beta$ -unsaturated ester as a light yellow oil.

Step 2: To a 100 mL round bottom flask containing the unsaturated ester (20 mmol) obtained above and anhydrous THF (40 mL) was carefully added LiAlH<sub>4</sub> (25 mmol) in a few portions at 0 °C. The reaction mixture was gradually warmed to room temperature and stirred overnight. The reaction mixture was then cooled to 0 °C and quenched with 1 M aqueous HCl. The organic layer was separated and the aqueous layer was extracted with CH<sub>2</sub>Cl<sub>2</sub>. The combined organics were dried over Na<sub>2</sub>SO<sub>4</sub>, filtered, and concentrated under reduced pressure. The crude residue was subjected to flash chromatography (Hexanes/EtOAc: 50/50) to afford the corresponding allylic alcohol as a light yellow oil.

Step 3: To a 100 mL round bottom flask containing the allylic alcohol (20 mmol) obtained above was added activated MnO<sub>2</sub> (100 mmol) and anhydrous CH<sub>2</sub>Cl<sub>2</sub> (40 mL) at rt. The reaction mixture was then stirred at 60 °C. After complete consumption of the starting material (as indicated by TLC analysis), the reaction mixture was filtered through a pad of celite. The resulting filtrate was concentrated under reduced pressure. The crude residue was subjected to flash chromatography (Hexanes/EtOAc: 95/5) to afford the corresponding  $\beta,\beta$ -disubstituted enal as a light yellow oil.

### III. Reaction conditions optimization

**Table 1.** Screening of different carbene catalysts, bases and solvents<sup>a</sup>.

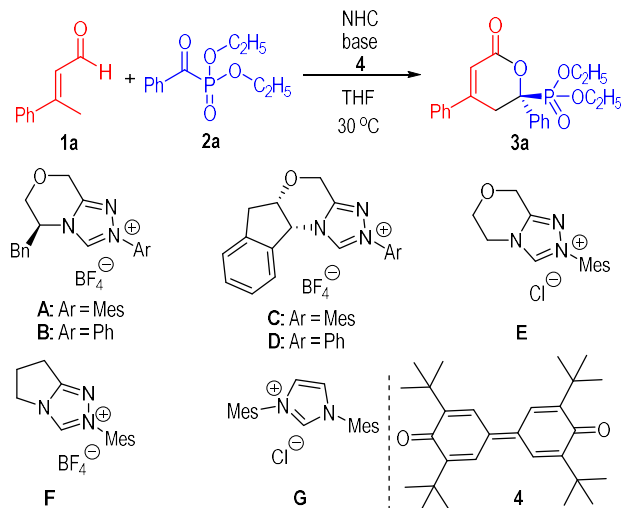

| Entry     | Cat.     | Base                                | Solvent            | Time [h]  | Yield [%] <sup>b</sup> | <i>e.r.</i> <sup>c</sup> |
|-----------|----------|-------------------------------------|--------------------|-----------|------------------------|--------------------------|
| 1         | <b>A</b> | Cs <sub>2</sub> CO <sub>3</sub>     | THF                | 24        | n.r.                   | --                       |
| 2         | <b>B</b> | Cs <sub>2</sub> CO <sub>3</sub>     | THF                | 24        | <5                     | --                       |
| <b>3</b>  | <b>C</b> | <b>Cs<sub>2</sub>CO<sub>3</sub></b> | <b>THF</b>         | <b>24</b> | <b>10</b>              | <b>90:10</b>             |
| 4         | <b>D</b> | Cs <sub>2</sub> CO <sub>3</sub>     | THF                | 24        | <5                     | --                       |
| 5         | <b>E</b> | Cs <sub>2</sub> CO <sub>3</sub>     | THF                | 24        | n.r.                   | --                       |
| 6         | <b>F</b> | Cs <sub>2</sub> CO <sub>3</sub>     | THF                | 24        | n.r.                   | --                       |
| 7         | <b>G</b> | Cs <sub>2</sub> CO <sub>3</sub>     | THF                | 24        | 36                     | 50:50                    |
| 8         | <b>C</b> | Na <sub>2</sub> CO <sub>3</sub>     | THF                | 48        | 33                     | n.d                      |
| 9         | <b>C</b> | K <sub>3</sub> PO <sub>4</sub>      | THF                | 48        | <10                    | n.d                      |
| 10        | <b>C</b> | K <sub>2</sub> CO <sub>3</sub>      | THF                | 48        | 26                     | 89:11                    |
| 11        | <b>C</b> | Et <sub>3</sub> N                   | THF                | 48        | 42                     | 97:3                     |
| 12        | <b>C</b> | DMAP                                | THF                | 48        | 31                     | 97:3                     |
| 13        | <b>C</b> | DABCO                               | THF                | 48        | 38                     | 97:3                     |
| <b>14</b> | <b>C</b> | <b>NaOAc</b>                        | <b>THF</b>         | <b>48</b> | <b>63</b>              | <b>97:3</b>              |
| 15        | <b>C</b> | NaOAc                               | THF                | 24        | 51                     | 97:3                     |
| 16        | <b>C</b> | NaOAc                               | toluene            | 48        | 23                     | 95:5                     |
| 17        | <b>C</b> | NaOAc                               | EA                 | 48        | 40                     | 96:4                     |
| 18        | <b>C</b> | NaOAc                               | CH <sub>3</sub> CN | 48        | <10                    | n.d.                     |

<sup>a</sup> Reaction conditions: **1a** (0.12 mmol), **2a** (0.1 mmol), NHC (0.02 mmol), base (0.12 mmol), **4** (0.12 mmol), THF (2 mL), 30 °C, 48 h. <sup>b</sup>Yields were isolated yields after column chromatography; n.r. = no reaction. <sup>c</sup>*e.r.* was determined *via* HPLC using a chiral stationary phase, n.d. = no determined.

## IV. General procedure.

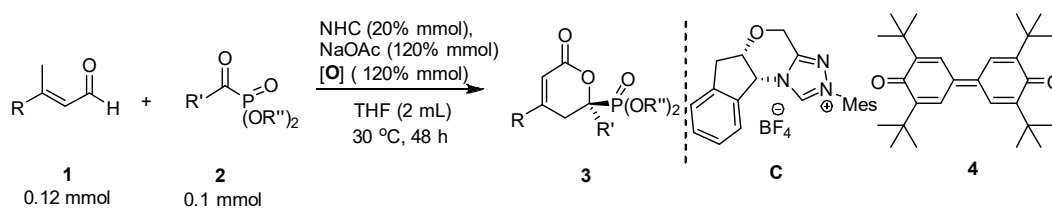

To a dry Schlenk reaction tube equipped with a magnetic stir bar was added  $\alpha$ -ketophosphonates **2** (0.1 mmol), aldehydes **1** (0.12 mmol), triazolium salt **C** (8.4 mg, 0.02 mmol), oxidant **4** (49 mg, 0.12 mmol) and NaOAc (9.9 mg, 0.12 mmol). The schlenk tube was then closed with septum, evacuated and refilled with N<sub>2</sub>, freshly distilled anhydrous THF (2 mL) was added. The mixture was stirred at 30 °C for 48 h. After completion of the reaction monitored by TLC, solvent was removed under reduced pressure and the residue was purified via column chromatography on silica gel with Hexane/EtOAc (3: 1) as eluent to afford the products **3**.

## V. Stereochemistry determination via X-ray crystallographic analysis

The absolute stereochemistry of **3j** was determined by the X-ray diffraction. This crystal was deposited in the Cambridge Crystallographic Data Centre and assigned as CCDC: 1813384.

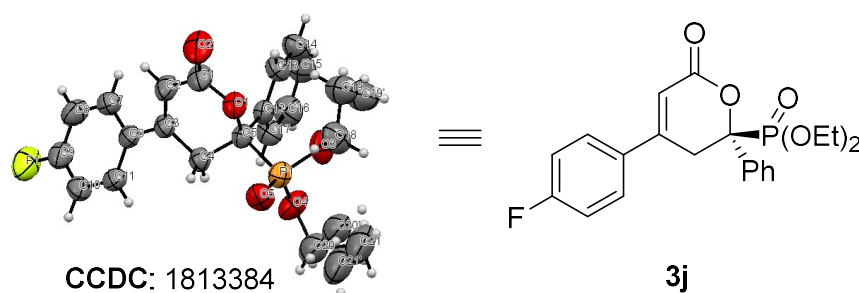

## VI. *In vitro* antibacterial bioassay

The target compounds were dissolved in 150  $\mu\text{L}$  DMSO and diluted with sterile distilled water containing 0.1 % Tween-20 (4 mL) to prepare 1000 and 500  $\mu\text{g}/\text{mL}$  stock solution. Their antibacterial activities against *Xanthomonas oryzae pv. oryzae* was evaluated by the turbidimeter test. 1 mL of stock solution was added to 4 mL nutrient broth liquid medium NB (3 g of beef extract, 5 g of peptone, 1 g of yeast powder, 10 g of glucose, and 1000 mL of distilled water, pH 7.0 - 7.2) in tubes. Then, to the tube, 40  $\mu\text{L}$  NB containing bacteria was added and incubated with continuous shaking at 180 rpm for 24 h at  $30 \pm 1$   $^{\circ}\text{C}$ . The test concentration was fixed at 200 and 100  $\mu\text{g}/\text{mL}$ . The data of bacterial growth was reported by measuring the optical density at 600 nm ( $\text{OD}_{600}$ ) with a spectrophotometer. DMSO in sterile distilled water containing 0.1 % Tween-20 served as the negative control, whereas Bismethiazol served as positive control. The inhibitory rate of bacterial culture growth was calculated according to the following formula:

$$\text{Inhibition rate (\%)} = (\text{CK}-\text{T})/\text{CK} \times 100$$

“CK” means the value of corrected optical density of bacterial growth on untreated NB (negative control), and “T” means the value of corrected optical density of bacterial growth on treated NB.

## VII. Antiviral biological assay

**1. Purification of tobacco mosaic virus:** Using Gooding's method,<sup>4</sup> the upper leaves of *Nicotiana tabacum* L. inoculated with TMV were selected and ground in phosphate buffer and then filtered through double-layer pledget. The filtrate was centrifuged at 10000 g treated with PEG twice, and centrifuged again. The whole experiment was processed at 4  $^{\circ}\text{C}$ . Absorbance value was estimated at 260 nm by ultraviolet spectrophotometer

$$\text{virus concn} = (A_{260} \times \text{dilution ratio}) / E_{1\text{cm}}^{0.1\%, 260\text{nm}}$$

**2. Inhibition effect of compound on TMV *in vivo*:** The virus was inhibited by mingling with the compound solution at the same volume for 30 min. The mixture was then inoculated on the left side of the leaves of *N. tabacum* L., whereas the right side of the leaves was inoculated with the mixture of solvent and the virus for control. The local lesion numbers were recorded 3 - 4 days after inoculation.<sup>5</sup> Three repetitions were conducted for each compound.

**3. Cure effect of compound on TMV *in vivo*:** The leaves of *N. tabacum* L. growing at the same ages were selected. TMV at a concentration of  $6 \times 10^{-3}$  mg/mL was dipped and

inoculated on the whole leaves. Then the leaves were washed with water and dried. The compound solution was smeared on the left side, and the solvent was smeared on the right side for control. The local lesion numbers were then recorded 3 - 4 days after inoculation.<sup>5</sup> For each compound, three repetitions were conducted to ensure the reliability of the results.

**4. Inactivation activities of compounds against TMV *in vivo*:** The virus was inhibited by mixing with the compound solution at the same volume for 30 min and inoculated on the left side of *N. tabacum* L. leaves, and the solvent and virus mixture was smeared on the right side of the leaves as the control. The number of local lesions was recorded 3 - 4 days after inoculation.<sup>6,7</sup> Every experiment for each compound was conducted in triplicate. The *in vivo* inhibition rates of the compounds were calculated using the following formula ("av" means average).

$$\text{Inhibition rate} = \left[ \frac{\text{av number of local lesions in control} - \text{av number of local lesions smeared with drugs}}{\text{av number of local lesions of control}} \right] \times 100\%$$

#### References:

- 1 Y. Huang, F. Berthiol, B. Stegink, M. M. Pollard, A. J. Minnaard, *Adv. Synth. Catal.*, 2009, **351**, 1423.
- 2 C. Burstein, F. Glorius, *Angew. Chem. Int. Ed.* 2004, **43**, 6205.
- 3 N. T. Reynolds, J. R. de Alaniz, T. Rovis, *J. Am. Chem. Soc.* 2004, **126**, 9518.
- 4 G. V. Gooding, Jr., T. T. Hebert, *Phytopathology* 1967, **57**, 1285.
- 5 S. Z. Li, D. M. Wang, S. M. Jiao, *Agriculture Press of China: Beijing, China*, 1991, **93**.
- 6 F. Wu, P. Li, D. Y. Hu, B. A. Song, *Res. Chem. Intermed.*, 2016, **42**, 7153.
- 7 B. A. Song, H. P. Zhang, H. Wang, S. Yang, L. H. Jin, D. Y. Hu, L. L. Pang, W. Xue, *J. Agric. Food Chem.*, 2005, **53**, 7886.



**Table 2. Antibacterial activity**

Antibacterial activity of the title compounds

| Compound                      | <i>X. oryzae pv. oryzae</i> inhibition rate [%] <sup>a</sup> |                |
|-------------------------------|--------------------------------------------------------------|----------------|
|                               | 100 $\mu$ g/mL                                               | 200 $\mu$ g/mL |
| <b>3a</b>                     | 3.5 $\pm$ 1.8                                                | 5.3 $\pm$ 3.5  |
| <b>3b</b>                     | 10.8 $\pm$ 3.0                                               | 45.8 $\pm$ 1.5 |
| <b>3c</b>                     | 7.9 $\pm$ 3.9                                                | 3.0 $\pm$ 0.5  |
| <b>3d</b>                     | 1.9 $\pm$ 6.7                                                | 26.8 $\pm$ 4.1 |
| <b>3e</b>                     | 8.1 $\pm$ 3.8                                                | 22.1 $\pm$ 1.3 |
| <b>3f</b>                     | 54.2 $\pm$ 2.0                                               | 60.8 $\pm$ 1.2 |
| <b>3h</b>                     | 4.9 $\pm$ 2.7                                                | 0              |
| <b>3i</b>                     | 21.8 $\pm$ 6.1                                               | 13.8 $\pm$ 2.9 |
| <b>3j</b>                     | 35.0 $\pm$ 3.4                                               | 39.8 $\pm$ 5.4 |
| <b>3k</b>                     | 0                                                            | 28.1 $\pm$ 6.8 |
| <b>3l</b>                     | 18.5 $\pm$ 4.5                                               | 27.4 $\pm$ 1.8 |
| <b>3n</b>                     | 23.2 $\pm$ 1.5                                               | 31.2 $\pm$ 3.8 |
| <b>3o</b>                     | 36.4 $\pm$ 1.2                                               | 29.2 $\pm$ 7.8 |
| <b>3p</b>                     | 0                                                            | 8.6 $\pm$ 3.6  |
| <b>3q</b>                     | 42.0 $\pm$ 3.8                                               | 44.7 $\pm$ 4.4 |
| <b>3s</b>                     | 10.7 $\pm$ 4.2                                               | 13.4 $\pm$ 5.4 |
| <b>3t</b>                     | 0                                                            | 28.0 $\pm$ 4.4 |
| <b>3u</b>                     | 44.4 $\pm$ 4.2                                               | 59.9 $\pm$ 4.4 |
| Bismertiazol <sup>b</sup>     | 47.1 $\pm$ 4.7                                               | 72.7 $\pm$ 5.8 |
| Negative control <sup>c</sup> | 0                                                            | 0              |

<sup>a</sup>Average of three replicates. <sup>b</sup>Commercial bactericide, used as the positive control.<sup>c</sup>DMSO was used as the negative control.

**Table 3. Inhibitory effect against TMV**Inhibitory effect of the title compounds against TMV *in vivo* at 500 µg/mL

| Compound                  | curative effect(%) <sup>a</sup> | protective effect(%) <sup>a</sup> | inactivation effect(%) <sup>a</sup> |
|---------------------------|---------------------------------|-----------------------------------|-------------------------------------|
| <b>3a</b>                 | 31.6±1.4                        | 17.5±2.9                          | 80.1±3.9                            |
| <b>3b</b>                 | 36.7±2.7                        | 3.4±1.5                           | 61.4±3.3                            |
| <b>3c</b>                 | 41.9±6.3                        | 5.6±2.4                           | 57.4±5.3                            |
| <b>3d</b>                 | 23.8±3.2                        | 25.7±2.2                          | 41.7±3.3                            |
| <b>3e</b>                 | 19.0±3.0                        | 17.8±4.1                          | 58.3±4.2                            |
| <b>3f</b>                 | 7.5±3.7                         | 19.8±2.0                          | 31.2±5.4                            |
| <b>3g</b>                 | 47.6±4.4                        | 3.9±1.9                           | 78.4±5.0                            |
| <b>3h</b>                 | 42.1±2.0                        | 4.6±1.5                           | 17.6±2.3                            |
| <b>3i</b>                 | 44.8±2.9                        | 24.3±3.5                          | 59.7±7.2                            |
| <b>3j</b>                 | 43.0±3.4                        | 8.0±1.2                           | 72.9±6.0                            |
| <b>3k</b>                 | 22.2±1.3                        | -9.9±1.8                          | 86.9±5.7                            |
| <b>3l</b>                 | 31.7±1.9                        | 7.8±1.3                           | 51.8±1.8                            |
| <b>3n</b>                 | 23.3±1.8                        | 14.7±1.8                          | 48.8±5.1                            |
| <b>3o</b>                 | 43.1±4.4                        | 24.1±2.9                          | 42.3±3.7                            |
| <b>3p</b>                 | 30.4±3.4                        | 44.8±2.7                          | 45.7±4.2                            |
| <b>3q</b>                 | 14.8±4.5                        | 12.6±3.9                          | 37.0±3.2                            |
| <b>3r</b>                 | 27.6±5.6                        | 44.4±7.9                          | 20.4±2.1                            |
| <b>3s</b>                 | -74.1±2.1                       | 6.4±2.8                           | 68.1±2.0                            |
| <b>3t</b>                 | -21.3±2.1                       | 17.5±1.1                          | 31.1±6.6                            |
| <b>3u</b>                 | 50.4±3.2                        | 23.6±1.8                          | 35.0±6.5                            |
| Ningnanmycin <sup>b</sup> | 45.5±2.3                        | 44.6±1.3                          | 90.1±1.2                            |

<sup>a</sup>Average of three replicates. <sup>b</sup>Ningnanmycin was used as the control.

## VIII. Characterization of intermediates & products

### 1-(4-(1-tosyl-1H-indol-3-yl)phenyl)ethan-1-one (1m-3):

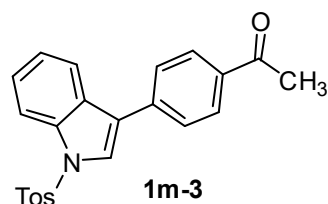

White solid. 2.4 g, 67% yield, m.p. 131 - 133 °C.

**<sup>1</sup>H NMR** (400 MHz, CDCl<sub>3</sub>) δ 8.08 - 8.03 (m, 3H), 7.85 - 7.77 (m, 4H), 7.71 (d, *J* = 8.6 Hz, 2H), 7.42 - 7.36 (m, 1H), 7.34 - 7.29 (m, 1H), 7.26 - 7.25 (m, 1H), 7.24 (s, 1H), 2.65 (s, 3H), 2.35 (s, 3H).

**<sup>13</sup>C NMR** (101 MHz, CDCl<sub>3</sub>) δ 197.56 (s), 145.29 (s), 138.11 (s), 135.98 (s), 135.53 (s), 135.11 (s), 130.05 (s), 129.04 (s), 128.74 (s), 127.81 (s), 127.47 (s), 126.97 (s), 125.20 (s), 123.84 (d, *J* = 2.7 Hz), 122.71 (s), 120.29 (s), 113.94 (s), 26.64 (s), 21.61 (s).

**HRMS** (ESI, m/z): Mass calcd. for C<sub>23</sub>H<sub>20</sub>O<sub>3</sub>NS [M+H]<sup>+</sup>, 390.1158; found 390.1159.

### (E)-3-(4-(1-tosyl-1H-indol-3-yl)phenyl)but-2-enal (1m):

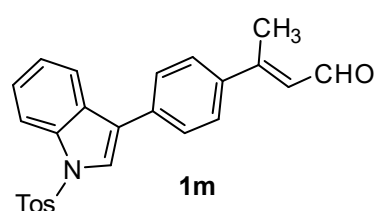

Yellow solid, 500 mg, 39% yield for 3 steps, m.p. 65 - 67 °C.

**<sup>1</sup>H NMR** (500 MHz, CDCl<sub>3</sub>) δ 10.21 (d, *J* = 7.7 Hz, 1H), 8.06 (d, *J* = 8.0 Hz, 1H), 7.83 - 7.73 (m, 4H), 7.66 (s, 4H), 7.38 (t, *J* = 7.8 Hz, 1H), 7.30 (t, *J* = 7.7 Hz, 1H), 7.24 (d, *J*

= 8.3 Hz, 2H), 6.46 (d, *J* = 7.6 Hz, 1H), 2.61 (s, 3H), 2.34 (s, 3H).

**<sup>13</sup>C NMR** (126 MHz, CDCl<sub>3</sub>) δ 191.27 (s), 156.86 (s), 145.28 (s), 139.50 (s), 135.62 (s), 135.23 (s), 130.08 (s), 129.06 (d, *J* = 20.6 Hz), 128.12 (s), 127.87 (s), 127.16 (s), 127.02 (s), 126.96 (s), 125.19 (s), 123.81 (s), 123.53 (s), 122.96 (s), 120.39 (s), 114.01 (s), 21.67 (s), 16.36 (s).

**HRMS** (ESI, m/z): Mass calcd. for C<sub>25</sub>H<sub>22</sub>O<sub>3</sub>NS [M+H]<sup>+</sup>, 416.1315; found 416.1314.

### Diethyl (R)-(6-oxo-2,4-diphenyl-3,6-dihydro-2H-pyran-2-yl)phosphonate (3a):

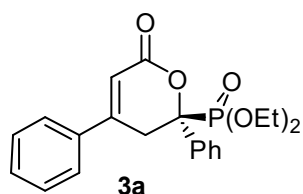

Light yellow oil, 24.7 mg, yield: 63%.

$[\alpha]_D^{26} = 115.7$  (c 1.0 CHCl<sub>3</sub>).

**<sup>1</sup>H NMR** (500 MHz, CDCl<sub>3</sub>) δ 7.54 (d, *J* = 7.6 Hz, 2H), 7.43 (dd, *J* = 4.8, 2.9 Hz, 2H), 7.39 - 7.33 (m, 3H), 7.30 (t, *J* = 7.6 Hz, 2H), 7.25 (t, *J* = 3.4 Hz, 1H), 6.17 (s, 1H), 4.28 - 4.14 (m, 2H), 3.86

(ddd, *J* = 10.1, 8.3, 7.0 Hz, 1H), 3.71 - 3.59 (m, 2H), 3.55 (dd, *J* = 17.8, 7.0 Hz, 1H), 1.30 (t, *J* = 7.1 Hz, 3H), 1.06 (t, *J* = 7.1 Hz, 3H).

**<sup>13</sup>C NMR** (126 MHz, CDCl<sub>3</sub>) δ 163.14 (d, *J* = 9.2 Hz), 152.72 (d, *J* = 13.1 Hz), 136.61 (s), 136.06 (s), 130.91 (s), 129.09 (s), 128.59-128.57 (m), 126.27 (d, *J* = 3.8 Hz), 126.14 (s), 115.07 (s), 82.22 (d, *J* = 170.1 Hz), 64.51 (d, *J* = 7.5 Hz), 64.37 (d, *J* = 7.5 Hz), 32.11 (s), 16.54 (d, *J* = 5.0 Hz), 16.28 (d, *J* = 6.8 Hz).

**<sup>31</sup>P NMR** (202 MHz, CDCl<sub>3</sub>) δ 16.92 (s).

**HRMS** (ESI, m/z): Mass calcd. for C<sub>21</sub>H<sub>24</sub>O<sub>5</sub>P [M+H]<sup>+</sup>, 387.1356; found 387.1349.

Enantiomeric ratio was measured by chiral phase HPLC (Chiralcel AD-H, 25 °C, IPA / Hexane = 20/80, 0.8 mL/min, 254 nm), Rt<sub>1</sub> (minor) = 15.8 min, Rt<sub>2</sub> (major) = 22.9 min; er = 97:3).

**Diethyl (R)-(6-oxo-2-phenyl-4-(p-tolyl)-3,6-dihydro-2H-pyran-2-yl) phosphonate (3b):**

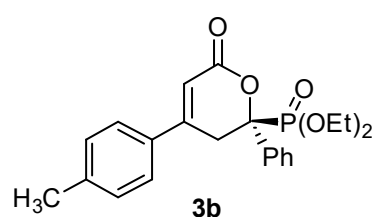

Light yellow oil, 29 mg, yield: 70%.

[α]<sub>D</sub><sup>26</sup> = 126.4 (c 1.0 CHCl<sub>3</sub>).

**<sup>1</sup>H NMR** (500 MHz, CDCl<sub>3</sub>) δ 7.58 - 7.56 (dd, *J* = 7.6, 2.0 Hz, 2H), 7.41 (d, *J* = 8.2 Hz, 2H), 7.35 (t, *J* = 7.5 Hz, 2H), 7.32 - 7.28 (m, 1H), 7.22 (d, *J* = 8.1 Hz, 2H), 6.21 (d, *J* = 2.0 Hz, 1H), 4.31 - 4.21 (m, 2H), 3.91 - 3.88 (m, 1H), 3.72 - 3.63 (m, 2H), 3.59 (dd, *J* = 17.8, 6.6 Hz, 1H), 2.38 (s, 3H), 1.35 (t, *J* = 7.0 Hz, 3H), 1.11 (t, *J* = 7.0 Hz, 3H).

**<sup>13</sup>C NMR** (126 MHz, CDCl<sub>3</sub>) δ 163.46 (d, *J* = 9.4 Hz), 152.63 (d, *J* = 13.4 Hz), 141.56 (s), 136.61 (s), 133.14 (s), 129.82 (s), 128.58 (s), 128.54 (d, *J* = 2.2 Hz), 126.31 (d, *J* = 3.7 Hz), 126.12 (s), 114.06 (s), 82.22 (d, *J* = 170.1 Hz), 64.56 (d, *J* = 7.5 Hz), 64.44 (d, *J* = 7.5 Hz), 31.93 (s), 21.46 (s), 16.57 (d, *J* = 5.4 Hz), 16.31 (d, *J* = 5.5 Hz).

**<sup>31</sup>P NMR** (202 MHz, CDCl<sub>3</sub>) δ 17.00 (s).

**HRMS** (ESI, m/z): Mass calcd. for C<sub>22</sub>H<sub>26</sub>O<sub>5</sub>P [M+H]<sup>+</sup>, 401.1512; found 401.1504.

Enantiomeric ratio was measured by chiral phase HPLC (Chiralcel AD-H; 25 °C, IPA/hexane = 20/80, 0.8 mL/min, 254 nm), Rt<sub>1</sub> (minor) = 16.2 min, Rt<sub>2</sub> (major) = 20.6 min; er = 97:3).

**Diethyl (R)-(4-(4-methoxyphenyl)-6-oxo-2-phenyl-3,6-dihydro-2H-pyran-2-yl) phosphonate (3c):**

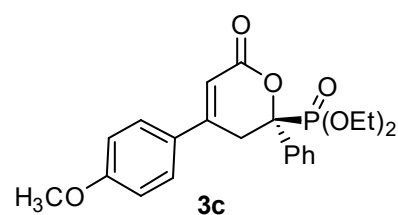

Light yellow oil, 30 mg, yield: 72%;

[α]<sub>D</sub><sup>26</sup> = 111.9 (c 1.0 CHCl<sub>3</sub>).

**<sup>1</sup>H NMR** (400 MHz, CDCl<sub>3</sub>) δ 7.60 - 7.54 (m, 2H), 7.48 (d, *J* = 8.9 Hz, 2H), 7.38 - 7.28 (m, 3H), 6.96 - 6.90 (m, 2H), 6.16 (d, *J* = 1.8 Hz, 1H), 4.32 - 4.22 (m, 2H), 3.95 - 3.84 (m, 1H), 3.84 (s, 3H), 3.70 - 3.60 (m, 3H), 1.36 (t, *J* = 7.1 Hz, 3H), 1.11 (t, *J* = 7.1 Hz, 3H).

**<sup>13</sup>C NMR** (101 MHz, CDCl<sub>3</sub>) δ 163.53 (d, *J* = 9.4 Hz), 161.91 (s), 152.03 (d, *J* = 13.5 Hz), 136.57 (s), 128.51 (d, *J* = 3.8 Hz), 128.46 (d, *J* = 3.8 Hz), 128.09 (d, *J* = 2.1 Hz), 127.77 (s), 126.22 (d, *J* = 4.2 Hz), 114.43 (s), 112.67 (s), 82.04 (d, *J* = 211.6 Hz), 64.50 (d, *J* = 7.6 Hz), 64.39 (d, *J* = 7.6 Hz), 55.46 (s), 31.70 (s), 16.49 (d, *J* = 5.6 Hz), 16.22 (d, *J* = 5.6 Hz).

**<sup>31</sup>P NMR** (162 MHz, CDCl<sub>3</sub>) δ 16.38 (s).

**HRMS** (ESI, m/z): Mass calcd. for C<sub>22</sub>H<sub>26</sub>O<sub>6</sub>P [M+H]<sup>+</sup>, 417.1461; found 417.1451.

Enantiomeric ratio was measured by chiral phase HPLC (Chiralcel AD-H; 25 °C, IPA/Hexane = 20/80, 0.8 mL/min, 254 nm),  $R_{t1}$  (minor) = 21.4 min,  $R_{t2}$  (major) = 25.3 min; er = 97:3).

**Diethyl (*R*)-(6-oxo-2-phenyl-4-(*m*-tolyl)-3,6-dihydro-2*H*-pyran-2-yl)phosphonate (3d):**

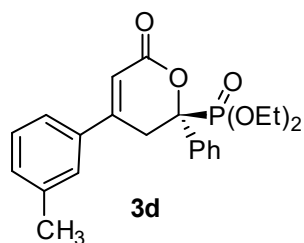

Light yellow oil, 33 mg, yield: 82%.

$[\alpha]_D^{26} = 113.0$  (c 1.0 CHCl<sub>3</sub>).

**<sup>1</sup>H NMR** (400 MHz, CDCl<sub>3</sub>) δ 7.62 - 7.52 (m, 2H), 7.39 - 7.28 (m, 6H), 7.25 (ddd,  $J = 6.0, 4.2, 2.9$  Hz, 1H), 6.22 (d,  $J = 2.1$  Hz, 1H), 4.34 - 4.21 (m, 2H), 3.90 (dt,  $J = 10.1, 7.1$  Hz, 1H), 3.75 - 3.64 (m, 2H), 3.58 (dd,  $J = 17.8, 6.9$  Hz, 1H), 2.38 (s, 3H), 1.36 (td,  $J = 7.1, 0.6$  Hz, 3H), 1.11 (td,  $J = 7.1, 0.6$  Hz, 3H).

**<sup>13</sup>C NMR** (101 MHz, CDCl<sub>3</sub>) δ 163.22 (d,  $J = 9.2$  Hz), 152.80 (d,  $J = 13.2$  Hz), 138.80 (s), 136.55 (s), 135.99 (d,  $J = 2.0$  Hz), 131.66 (s), 128.90 (s), 128.52 (d,  $J = 2.6$  Hz), 128.47 (d,  $J = 3.0$  Hz), 126.73 (s), 126.25 (d,  $J = 4.1$  Hz), 123.23 (s), 114.79 (s), 82.16 (d,  $J = 211.6$  Hz), 64.49 (d,  $J = 7.6$  Hz), 64.36 (d,  $J = 7.6$  Hz), 32.07 (s), 21.42 (s), 16.48 (d,  $J = 5.6$  Hz), 16.21 (d,  $J = 5.6$  Hz).

**<sup>31</sup>P NMR** (162 MHz, CDCl<sub>3</sub>) δ 16.36 (s).

**HRMS** (ESI, m/z): Mass calcd. for C<sub>22</sub>H<sub>26</sub>O<sub>5</sub>P [M+H]<sup>+</sup>, 401.1512; found 401.1504.

Enantiomeric ratio was measured by chiral phase HPLC (Chiralcel AD-H; 25 °C, IPA/Hexane = 20/80, 0.8 mL/min, 254 nm),  $R_{t1}$  (minor) = 8.2 min,  $R_{t2}$  (major) = 12.6 min; er = 96:4).

**Diethyl (*R*)-(4-(3-methoxyphenyl)-6-oxo-2-phenyl-3,6-dihydro-2*H*-pyran-2-yl)phosphonate (3e):**

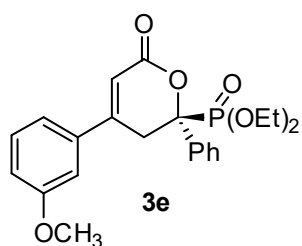

Light yellow oil, 35 mg, yield: 84%.

$[\alpha]_D^{26} = 107.3$  (c 1.0 CHCl<sub>3</sub>).

**<sup>1</sup>H NMR** (400 MHz, CDCl<sub>3</sub>) δ 7.61 - 7.53 (m, 2H), 7.41 - 7.28 (m, 4H), 7.11 - 7.06 (m, 1H), 7.01 - 6.94 (m, 2H), 6.22 (d,  $J = 2.1$  Hz, 1H), 4.33 - 4.19 (m, 2H), 3.96 - 3.86 (m, 1H), 3.82 (s, 3H), 3.75 - 3.64 (m, 2H), 3.62 - 3.53 (m, 1H), 1.36 (td,  $J = 7.0, 0.5$  Hz, 3H), 1.12 (td,  $J = 7.0, 0.5$  Hz, 3H).

**<sup>13</sup>C NMR** (101 MHz, CDCl<sub>3</sub>) δ 163.14 (d,  $J = 9.3$  Hz), 159.97 (s), 152.61 (d,  $J = 13.2$  Hz), 137.49 (d,  $J = 2.1$  Hz), 136.48 (s), 130.06 (s), 128.54 (d,  $J = 2.7$  Hz), 128.51 (d,  $J = 3.2$  Hz), 126.25 (d,  $J = 4.1$  Hz), 118.51 (s), 116.27 (s), 115.26 (s), 111.71 (s), 82.21 (d,  $J = 211.6$  Hz), 64.48 (d,  $J = 7.6$  Hz), 64.36 (d,  $J = 7.6$  Hz), 55.42 (s), 32.14 (s), 16.48 (d,  $J = 5.6$  Hz), 16.22 (d,  $J = 5.6$  Hz).

**<sup>31</sup>P NMR** (202 MHz, CDCl<sub>3</sub>) δ 16.92 (s).

**HRMS** (ESI, m/z): Mass calcd. for C<sub>22</sub>H<sub>26</sub>O<sub>6</sub>P [M+H]<sup>+</sup>, 417.1461; found 417.1454.

Enantiomeric ratio was measured by chiral phase HPLC (Chiralcel AD-H; 25 °C, IPA/Hexane = 20/80, 0.8 mL/min, 254 nm),  $R_{t1}$  (minor) = 11.6 min,  $R_{t2}$  (major) = 16.0 min; er = 97.5:2.5).

**Diethyl (*R*)-(6-oxo-2-phenyl-4-(*o*-tolyl)-3,6-dihydro-2*H*-pyran-2-yl)phosphonate (3f):**

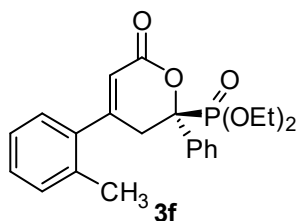

Light yellow oil, 16 mg, yield: 40%;

$[\alpha]_D^{26} = -6.3$  (c 1.0 CHCl<sub>3</sub>).

**<sup>1</sup>H NMR** (400 MHz, CDCl<sub>3</sub>)  $\delta$  7.59 - 7.51 (m, 2H), 7.43 - 7.30 (m, 3H), 7.24 (dd,  $J = 7.1, 1.5$  Hz, 1H), 7.22 - 7.16 (m, 2H), 7.04 - 6.94 (m, 1H), 5.87 (d,  $J = 2.1$  Hz, 1H), 4.27 (dq,  $J = 14.2, 7.1$  Hz, 2H), 3.94 - 3.88 (m, 1H), 3.76 - 3.66 (m, 2H),

3.28 (dd,  $J = 17.9, 7.5$  Hz, 1H), 2.11 (s, 3H), 1.33 (t,  $J = 7.1$  Hz, 3H), 1.12 (t,  $J = 7.1$  Hz, 3H).

**<sup>13</sup>C NMR** (101 MHz, CDCl<sub>3</sub>)  $\delta$  162.59 (d,  $J = 8.8$  Hz), 155.26 (d,  $J = 12.7$  Hz), 137.83 (d,  $J = 1.8$  Hz), 136.67 (s), 134.59 (s), 131.00 (s), 129.08 (s), 128.52 (d,  $J = 1.9$  Hz), 128.50 (d,  $J = 2.4$  Hz), 126.94 (s), 126.37 (s), 126.33 (s), 119.10 (s), 82.52 (d,  $J = 170.1$  Hz), 64.40 (d,  $J = 2.1$  Hz), 64.33 (d,  $J = 5.6$  Hz), 35.25 (s), 19.94 (s), 16.48 (d,  $J = 5.6$  Hz), 16.22 (d,  $J = 5.6$  Hz).

**<sup>31</sup>P NMR** (162 MHz, CDCl<sub>3</sub>)  $\delta$  16.28 (s).

**HRMS** (ESI, m/z): Mass calcd. for C<sub>22</sub>H<sub>26</sub>O<sub>5</sub>P [M+H]<sup>+</sup>, 401.1512; found 401.1507.

Enantiomeric ratio was measured by chiral phase HPLC (Chiralcel AD-H; 25 °C, IPA/Hexane = 20/80, 0.8 mL/min, 254 nm),  $R_{t1}$  (minor) = 10.6 min,  $R_{t2}$  (major) = 14.1 min; er = 99:1).

**Diethyl (*R*)-(4-(2-methoxyphenyl)-6-oxo-2-phenyl-3,6-dihydro-2*H*-pyran-2-yl)phosphonate (3g):**

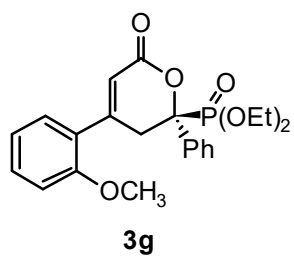

Light yellow oil, 17 mg, yield: 41%.

$[\alpha]_D^{26} = 58.4$  (c 1.0 CHCl<sub>3</sub>).

**<sup>1</sup>H NMR** (500 MHz, CDCl<sub>3</sub>)  $\delta$  7.53 (d,  $J = 7.5$  Hz, 2H), 7.36 - 7.26 (m, 4H), 7.03 (d,  $J = 7.4$  Hz, 1H), 6.93 - 6.84 (m, 2H), 6.05 (d,  $J = 1.9$  Hz, 1H), 4.23 (p,  $J = 7.1$  Hz, 2H), 3.91-3.85 (m, 1H), 3.79 (s, 3H), 3.74 - 3.63 (m, 2H), 3.58 (dd,  $J = 17.9, 6.5$

Hz, 1H), 1.33 (t,  $J = 7.1$  Hz, 3H), 1.08 (t,  $J = 7.1$  Hz, 3H).

**<sup>13</sup>C NMR** (101 MHz, CDCl<sub>3</sub>)  $\delta$  163.18 (d,  $J = 9.3$  Hz), 157.15 (s), 153.92 (d,  $J = 14.0$  Hz), 136.53 (s), 131.38 (s), 128.94 (s), 128.33 (d,  $J = 3.0$  Hz), 128.23 (d,  $J = 2.6$  Hz), 126.61 (s), 126.57 (s), 120.89 (s), 117.77 (s), 111.23 (s), 82.59 (d,  $J = 170.1$  Hz), 64.35 (d,  $J = 7.6$  Hz), 64.16 (d,  $J = 7.6$  Hz), 55.36 (s), 33.43 (s), 16.47 (d,  $J = 5.6$  Hz), 16.21 (d,  $J = 5.6$  Hz).

**<sup>31</sup>P NMR** (162 MHz, CDCl<sub>3</sub>)  $\delta$  16.45 (s).

**HRMS** (ESI, m/z): Mass calcd. for C<sub>22</sub>H<sub>26</sub>O<sub>6</sub>P [M+H]<sup>+</sup>, 417.1461; found 417.1451.

Enantiomeric ratio was measured by chiral phase HPLC (Chiralcel AD-H; 25 °C, IPA/Hexane = 20/80, 0.8 mL/min, 254 nm),  $R_{t1}$  (minor) = 12.1 min,  $R_{t2}$  (major) = 14.6 min; er = 98:2).

**Diethyl (R)-(4-(4-chlorophenyl)-6-oxo-2-phenyl-3,6-dihydro-2H-pyran-2-yl) phosphonate (3h):**

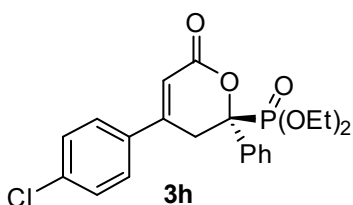

Light yellow oil, 32 mg, yield: 76%.

$[\alpha]_D^{26} = 111.2$  (c 1.0 CHCl<sub>3</sub>).

**<sup>1</sup>H NMR** (500 MHz, CDCl<sub>3</sub>) δ 7.54 (dd,  $J = 7.7, 1.4$  Hz, 2H), 7.47 (dt,  $J = 8.9, 4.0$  Hz, 2H), 7.33 (t,  $J = 7.5$  Hz, 2H), 7.31 - 7.26 (m, 1H), 7.07 (t,  $J = 8.6$  Hz, 2H), 6.15 (d,  $J = 1.8$  Hz, 1H), 4.23 (pd,  $J = 7.1, 1.2$  Hz, 2H), 3.94 - 3.80 (m, 1H), 3.65 (dddd,  $J = 17.2, 8.5, 5.7, 1.4$  Hz, 2H), 3.52 (dd,  $J = 17.8, 7.1$  Hz, 1H), 1.32 (t,  $J = 7.1$  Hz, 3H), 1.08 (t,  $J = 7.0$  Hz, 3H).

**<sup>13</sup>C NMR** (101 MHz, CDCl<sub>3</sub>) δ 164.25 (d,  $J = 252.5$  Hz), 163.13 - 162.84 (m), 151.45 (d,  $J = 13.1$  Hz), 136.45 (s), 132.17 (dd,  $J = 3.3, 2.1$  Hz), 128.57 (d,  $J = 2.5$  Hz), 128.18 (d,  $J = 8.7$  Hz), 126.15 (d,  $J = 4.1$  Hz), 116.32 (s), 116.11 (s), 114.85 (s), 82.11 (d,  $J = 184.8$  Hz), 64.53 (d,  $J = 7.6$  Hz), 64.38 (d,  $J = 7.6$  Hz), 32.15 (s), 16.46 (d,  $J = 5.6$  Hz), 16.20 (d,  $J = 5.6$  Hz).

**<sup>31</sup>P NMR** (162 MHz, CDCl<sub>3</sub>) δ 16.23 (s).

**HRMS** (ESI, m/z): Mass calcd. for C<sub>21</sub>H<sub>23</sub>ClO<sub>5</sub>P [M+H]<sup>+</sup>, 421.0966; found 421.1088.

Enantiomeric ratio was measured by chiral phase HPLC (Chiralcel AD-H; 25 °C, IPA/Hexane = 20/80, 0.8 mL/min, 254 nm),  $R_{t1}$  (minor) = 16.0 min,  $R_{t2}$  (major) = 25.2 min; er = 98:2).

**Diethyl (R)-(4-(4-bromophenyl)-6-oxo-2-phenyl-3,6-dihydro-2H-pyran-2-yl) phosphonate (3i):**

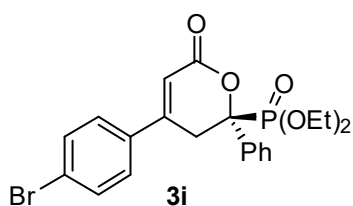

Light yellow oil, 35 mg, yield: 75%.

$[\alpha]_D^{26} = 127.6$  (c 1.0 CHCl<sub>3</sub>).

**<sup>1</sup>H NMR** (500 MHz, CDCl<sub>3</sub>) δ 7.53 (d,  $J = 8.6$  Hz, 4H), 7.39 - 7.32 (m, 4H), 7.30 (dd,  $J = 7.2, 1.6$  Hz, 1H), 6.20 (d,  $J = 2.1$  Hz, 1H), 4.29 - 4.19 (m, 2H), 3.88 (dt,  $J = 10.0, 7.0$  Hz, 1H), 3.72 - 3.59 (m, 2H), 3.51 (dd,  $J = 17.8, 7.1$  Hz, 1H), 1.34 (t,

$J = 7.1$  Hz, 3H), 1.09 (t,  $J = 7.1$  Hz, 3H).

**<sup>13</sup>C NMR** (126 MHz, CDCl<sub>3</sub>) δ 162.93 (d,  $J = 9.3$  Hz), 151.48 (d,  $J = 13.1$  Hz), 136.44 (s), 134.99 (s), 132.38 (s), 128.67 (d,  $J = 1.7$  Hz), 127.64 (s), 126.25 (s), 126.22 (s), 125.48 (s), 115.51 (s), 82.22 (d,  $J = 170.1$  Hz), 64.64 (d,  $J = 7.5$  Hz), 64.49 (d,  $J = 7.5$  Hz), 32.06 (s), 16.55 (d,  $J = 5.6$  Hz), 16.28 (d,  $J = 5.3$  Hz).

**<sup>31</sup>P NMR** (202 MHz, CDCl<sub>3</sub>) δ 16.79 (s).

**HRMS** (ESI, m/z): Mass calcd. for C<sub>21</sub>H<sub>23</sub>BrO<sub>5</sub>P [M+H]<sup>+</sup>, 465.0461; found 465.0451.

Enantiomeric ratio was measured by chiral phase HPLC (Chiralcel AD-H; 25 °C, IPA/Hexane = 20/80, 0.8 mL/min, 254 nm),  $R_{t1}$  (minor) = 19.1 min,  $R_{t2}$  (major) = 27.4 min; er = 96:4).

**Diethyl (*R*)-(4-(4-fluorophenyl)-6-oxo-2-phenyl-3,6-dihydro-2*H*-pyran-2-yl) phosphonate (**3j**):**

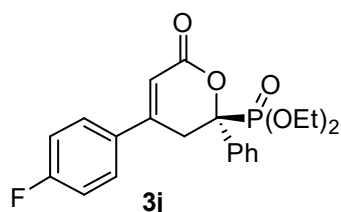

Light yellow crystal, m.p. 111 - 112°C. 25.6 mg, yield: 63%.

$[\alpha]_D^{26} = 97.6$  (c 1.0 CHCl<sub>3</sub>).

**<sup>1</sup>H NMR** (400 MHz, CDCl<sub>3</sub>)  $\delta$  7.60 - 7.55 (m, 2H), 7.53 - 7.48 (m, 2H), 7.40 - 7.29 (m, 3H), 7.15 - 7.07 (m, 2H), 6.19 (d,  $J = 2.1$  Hz, 1H), 4.34 - 4.19 (m, 2H), 3.90 (dt,  $J = 10.1, 7.1$  Hz, 1H), 3.76 - 3.60 (m, 2H), 3.56 (dd,  $J = 17.8, 7.0$  Hz, 1H), 1.36 (t,  $J = 7.1$  Hz, 3H), 1.11 (t,  $J = 7.1$  Hz, 3H).

**<sup>13</sup>C NMR** (101 MHz, CDCl<sub>3</sub>)  $\delta$  164.30 (d,  $J = 246.4$  Hz), 163.00 ( $J = 2.0$  Hz), 151.48 (d,  $J = 13.2$  Hz), 136.42 (s), 132.14 (d,  $J = 3.3$  Hz), 128.59 (d,  $J = 2.5$  Hz), 128.19 (d,  $J = 8.7$  Hz), 126.17 (d,  $J = 4.1$  Hz), 116.34 (s), 116.12 (s), 114.84 (s), 82.11 (d,  $J = 184.8$  Hz), 64.57 (d,  $J = 7.6$  Hz), 64.42 (d,  $J = 7.6$  Hz), 32.14 (s), 16.48 (d,  $J = 5.6$  Hz), 16.21 (d,  $J = 5.6$  Hz).

**<sup>31</sup>P NMR** (162 MHz, CDCl<sub>3</sub>)  $\delta$  16.22 (s).

**<sup>19</sup>F NMR** (376 MHz, CDCl<sub>3</sub>)  $\delta$  -108.89 (s).

**HRMS** (ESI, m/z): Mass calcd. for C<sub>21</sub>H<sub>23</sub>FO<sub>5</sub>P [M+H]<sup>+</sup>, 405.1261; found 405.1254.

Enantiomeric ratio was measured by chiral phase HPLC (Chiralcel AD-H; 25 °C, IPA/Hexane = 20/80, 0.8 mL/min, 254 nm),  $R_{t1}$  (minor) = 19.1 min,  $R_{t2}$  (major) = 31.1 min; er = 97:3).

**Diethyl (*R*)-(4-(2-fluorophenyl)-6-oxo-2-phenyl-3,6-dihydro-2*H*-pyran-2-yl) phosphonate (**3k**):**

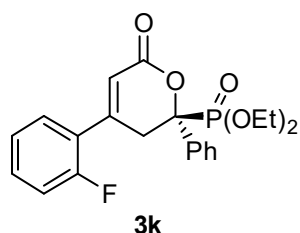

Light yellow oil, 33 mg, yield: 81%.

$[\alpha]_D^{26} = 82.4$  (c 1.0 CHCl<sub>3</sub>).

**<sup>1</sup>H NMR** (500 MHz, CDCl<sub>3</sub>)  $\delta$  7.58 - 7.52 (m, 2H), 7.40 - 7.33 (m, 3H), 7.32 - 7.28 (m, 1H), 7.25 (td,  $J = 7.9, 1.7$  Hz, 1H), 7.18 - 7.05 (m, 2H), 6.19 (d,  $J = 2.2$  Hz, 1H), 4.27 - 4.20 (m, 2H), 3.94 - 3.85 (m, 1H), 3.77 - 3.64 (m, 2H), 3.55 (dd,  $J = 18.0, 7.5$  Hz, 1H), 1.34 (t,  $J = 7.1$  Hz, 3H), 1.10 (t,  $J = 7.0$  Hz, 3H).

**<sup>13</sup>C NMR** (126 MHz, CDCl<sub>3</sub>)  $\delta$  162.66 (d,  $J = 9.0$  Hz), 160.27 (d,  $J = 253.3$  Hz), 149.35 (d,  $J = 13.4$  Hz), 136.41 (s), 132.06 (d,  $J = 8.7$  Hz), 128.85 (s), 128.56 (s), 126.46 (d,  $J = 3.8$  Hz), 124.93 (d,  $J = 12.2$  Hz), 124.81 (d,  $J = 2.6$  Hz), 119.03 (d,  $J = 5.2$  Hz), 116.80 (s), 116.62 (s), 82.47 (d,  $J = 170.1$  Hz), 64.55 (d,  $J = 7.5$  Hz), 64.40 (d,  $J = 7.5$  Hz), 33.21 (s), 16.52 (d,  $J = 5.6$  Hz), 16.29 (d,  $J = 5.6$  Hz).



**<sup>31</sup>P NMR** (202 MHz, CDCl<sub>3</sub>) δ 16.83 (s).

**<sup>19</sup>F NMR** (471 MHz, CDCl<sub>3</sub>) δ -111.45 (s).

**HRMS** (ESI, m/z): Mass calcd. for C<sub>21</sub>H<sub>23</sub>FO<sub>5</sub>P [M+H]<sup>+</sup>, 405.1261; found 405.1252.

Enantiomeric ratio was measured by chiral phase HPLC (Chiralcel AD-H; 25 °C, IPA/Hexane = 20/80, 0.8 mL/min, 254 nm), Rt<sub>1</sub>(minor) = 12.4 min, Rt<sub>2</sub> (major) = 17.4 min; er = 98:2).

**Diethyl (R)-(4-(3-bromophenyl)-6-oxo-2-phenyl-3,6-dihydro-2H-pyran-2-yl)phosphonate (3l):**

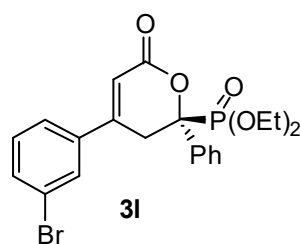

Light yellow oil, 30 mg, yield: 64%.

$[\alpha]_D^{26} = 99.3$  (c 1.0 CHCl<sub>3</sub>).

**<sup>1</sup>H NMR** (500 MHz, CDCl<sub>3</sub>) δ 7.59 (t, *J* = 1.7 Hz, 1H), 7.56 - 7.51 (m, 3H), 7.40 - 7.32 (m, 3H), 7.32 - 7.28 (m, 1H), 7.25 (s, 1H), 6.19 (d, *J* = 2.0 Hz, 1H), 4.29 - 4.16 (m, 2H), 3.94 - 3.80 (m, 1H), 3.74 - 3.58 (m, 2H), 3.49 (dd, *J* = 17.8, 7.2 Hz, 1H), 1.33 (t,

*J* = 7.1 Hz, 3H), 1.09 (t, *J* = 7.2 Hz, 3H).

**<sup>13</sup>C NMR** (101 MHz, CDCl<sub>3</sub>) δ 162.66 (d, *J* = 9.1 Hz), 151.04 (d, *J* = 13.1 Hz), 138.15 (d, *J* = 2.1 Hz), 136.34 (s), 133.66 (s), 130.54 (s), 129.09 (s), 128.63 (s), 128.60 (s), 126.17 (d, *J* = 4.1 Hz), 124.64 (s), 123.27 (s), 116.16 (s), 82.20 (d, *J* = 184.8 Hz) (s), 64.55 (d, *J* = 7.6 Hz), 64.38 (d, *J* = 7.6 Hz), 32.11 (s), 16.48 (d, *J* = 5.6 Hz), 16.21 (d, *J* = 5.6 Hz).

**<sup>31</sup>P NMR** (202 MHz, CDCl<sub>3</sub>) δ 16.77 (s).

**HRMS** (ESI, m/z): Mass calcd. for C<sub>21</sub>H<sub>23</sub>BrO<sub>5</sub>P [M+H]<sup>+</sup>, 465.0461; found 465.0455.

Enantiomeric ratio was measured by chiral phase HPLC (Chiralcel AD-H; 25 °C, IPA/Hexane = 20/80, 0.8 mL/min, 254 nm), Rt<sub>1</sub> (minor) = 10.3 min, Rt<sub>2</sub> (major) = 18.4 min; er = 96:4).

**Diethyl (R)-(6-oxo-2-phenyl-4-(4-(1-tosyl-1H-indol-3-yl)phenyl)-3,6-dihydro-2H-pyran-2-yl)phosphonate (3m):**

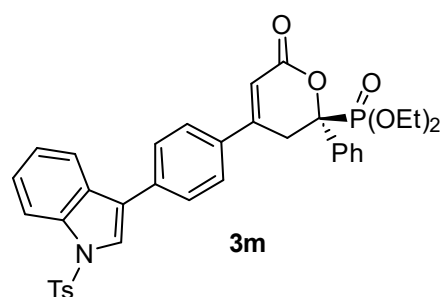

Light yellow solid, m.p. 105 - 106 °C. 37 mg, yield: 57%.

$[\alpha]_D^{21} = 108.4$  (c 1.0 CHCl<sub>3</sub>).

**<sup>1</sup>H NMR** (500 MHz, CDCl<sub>3</sub>) δ 8.05 (d, *J* = 8.3 Hz, 1H), 7.81 (d, *J* = 8.4 Hz, 2H), 7.76 - 7.74 (m, 2H), 7.66 (d, *J* = 8.3 Hz, 2H), 7.60 - 7.58 (m, 4H), 7.39 - 7.35 (m, 3H), 7.33 - 7.29 (m, 2H), 7.24 (d, *J* = 8.3 Hz,

2H), 6.29 (d, *J* = 1.9 Hz, 1H), 4.32 - 4.24 (m, 2H), 3.91 - 3.89 (m, 1H), 3.73 - 3.63 (m, 3H), 2.34 (s, 3H), 1.37 (t, *J* = 7.1 Hz, 3H), 1.11 (t, *J* = 7.0 Hz, 3H).

**<sup>13</sup>C NMR** (126 MHz, CDCl<sub>3</sub>) δ 163.32 (d, *J* = 9.3 Hz), 152.07 (d, *J* = 13.3 Hz), 145.38 (s), 136.50 (s), 136.04 (s), 135.54 (s), 135.06 (s), 134.86 (s), 130.13 (s), 128.80 (s), 128.68 (s),

128.33 (s), 127.04(s), 126.80 (s), 126.34 (s), 126.31 (s), 125.27 (s), 123.89 (s), 123.67 (s), 122.67 (s), 120.34 (s), 114.84 (s), 114.01 (s), 82.27(d,  $J = 170.1$  Hz), 64.66 (d,  $J = 7.4$  Hz), 64.54(d,  $J = 7.4$  Hz), 31.92 (s), 21.72 (s), 16.62 (d,  $J = 5.6$  Hz), 16.35 (d,  $J = 5.4$  Hz).

**$^{31}\text{P}$  NMR** (202 MHz,  $\text{CDCl}_3$ )  $\delta$  16.91 (s).

**HRMS** (ESI,  $m/z$ ): Mass calcd. for  $\text{C}_{36}\text{H}_{35}\text{O}_7\text{NPS}$   $[\text{M}+\text{H}]^+$ , 656.1866; found 656.1869.

Enantiomeric ratio was measured by chiral phase HPLC (Chiralcel AD-H; 25 °C, IPA/Hexane = 20/80, 0.8 mL/min, 254 nm),  $\text{Rt}_1$  (minor) = 46.8 min,  $\text{Rt}_2$  (major) = 60.8 min; er = 96:4).

**Diethyl (*R*)-(4-(naphthalen-2-yl)-6-oxo-2-phenyl-3,6-dihydro-2H-pyran-2-yl) phosphonate (3n):**

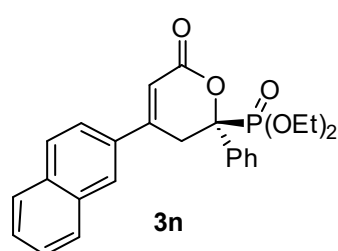

Light yellow oil, 30 mg, yield: 69%.

$[\alpha]_{\text{D}}^{26} = 196.9$  (c 1.0  $\text{CHCl}_3$ ).

**$^1\text{H}$  NMR** (500 MHz,  $\text{CDCl}_3$ )  $\delta$  8.01 (s, 1H), 7.89 (dd,  $J = 8.1$ , 4.7 Hz, 1H), 7.83 (dd,  $J = 9.0$ , 3.3 Hz, 2H), 7.63 - 7.58 (m, 2H), 7.57 - 7.51 (m, 3H), 7.35 (t,  $J = 7.5$  Hz, 2H), 7.29 (dd,  $J = 7.8$ , 6.2 Hz, 1H), 6.38 (d,  $J = 1.9$  Hz, 1H), 4.35 - 4.21 (m,

2H), 3.91 (dt,  $J = 10.1$ , 7.1 Hz, 1H), 3.86 - 3.72 (m, 2H), 3.71 - 3.61 (m, 1H), 1.37 (t,  $J = 7.0$  Hz, 3H), 1.12 (t,  $J = 7.0$  Hz, 3H).

**$^{13}\text{C}$  NMR** (126 MHz,  $\text{CDCl}_3$ )  $\delta$  163.30 (d,  $J = 9.2$  Hz), 152.28 (d,  $J = 13.3$  Hz), 136.58 (s), 134.38 (s), 133.10 (d,  $J = 9.8$  Hz), 128.95 (s), 128.94 (s), 128.64 (d,  $J = 1.9$  Hz), 128.61 - 128.56 (m), 127.84 (s), 127.79 (s), 127.12 (s), 126.67 (s), 126.37 (s), 126.34 (s), 122.74 (s), 115.20 (s), 82.28 (d,  $J = 170.1$  Hz), 64.65 (d,  $J = 7.6$  Hz), 64.45 (d,  $J = 7.6$  Hz), 31.97 (s), 16.59 (d,  $J = 5.6$  Hz), 16.31 (d,  $J = 5.6$  Hz).

**$^{31}\text{P}$  NMR** (162 MHz,  $\text{CDCl}_3$ )  $\delta$  16.34 (s).

**HRMS** (ESI,  $m/z$ ): Mass calcd. for  $\text{C}_{25}\text{H}_{26}\text{O}_5\text{P}$   $[\text{M}+\text{H}]^+$ , 437.1510; found 437.1512.

Enantiomeric ratio was measured by chiral phase HPLC (Chiralcel AD-H; 25 °C, IPA/Hexane = 20/80, 0.8 mL/min, 254 nm),  $\text{Rt}_1$  (minor) = 16.0 min,  $\text{Rt}_2$  (major) = 24.3 min; er = 96:4).

**Diethyl (*R*)-(6-oxo-2-phenyl-4-(thiophen-2-yl)-3,6-dihydro-2H-pyran-2-yl) phosphonate (3o):**

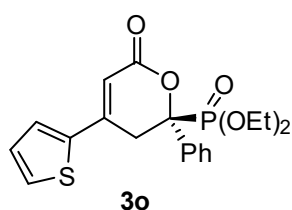

Light yellow oil, 21 mg, yield: 54%.

$[\alpha]_{\text{D}}^{24} = 167.7$  (c 1.0  $\text{CHCl}_3$ ).

**$^1\text{H}$  NMR** (500 MHz,  $\text{CDCl}_3$ )  $\delta$  7.57 - 7.53 (m, 2H), 7.45 - 7.39 (m, 2H), 7.33 (t,  $J = 7.5$  Hz, 2H), 7.30 - 7.27 (m, 1H), 7.08 (dd,  $J = 4.9$ , 3.8 Hz, 1H), 6.13 (d,  $J = 2.0$  Hz, 1H), 4.26 - 4.22 (m,

2H), 3.89 - 3.86 (m, 1H), 3.68 - 3.63 (m, 2H), 3.61 - 3.56 (m, 1H), 1.33 (t,  $J = 7.1$  Hz, 3H), 1.09 (t,  $J = 7.1$  Hz, 3H).

**<sup>13</sup>C NMR** (101 MHz, CDCl<sub>3</sub>) δ 163.14 (d, *J* = 9.5 Hz), 145.76 (d, *J* = 14.1 Hz), 140.15 (d, *J* = 2.8 Hz), 136.29 (d, *J* = 0.7 Hz), 129.87 (s), 128.57 (d, *J* = 2.6 Hz), 128.54 (d, *J* = 2.4 Hz), 128.26 (s), 126.21 (s), 126.17 (s), 111.99 (s), 81.97 (d, *J* = 170.6 Hz), 64.58 (d, *J* = 7.6 Hz), 64.44 (d, *J* = 7.6 Hz), 32.14 (s), 16.46 (d, *J* = 5.7 Hz), 16.21 (d, *J* = 5.6 Hz).

**<sup>31</sup>P NMR** (162 MHz, CDCl<sub>3</sub>) δ 15.98 (s).

**HRMS** (ESI, *m/z*): Mass calcd. for C<sub>19</sub>H<sub>22</sub>O<sub>5</sub>PS [M+H]<sup>+</sup>, 393.0920; found 393.0910.

Enantiomeric ratio was measured by chiral phase HPLC (Chiralcel AD-H; 25 °C, IPA/Hexane = 20/80, 0.8 mL/min, 254 nm), Rt<sub>1</sub> (minor) = 14.8 min, Rt<sub>2</sub> (major) = 21.1 min; er = 95:5).

**Diethyl (*R*)-(4-(benzo[*b*]thiophen-2-yl)-6-oxo-2-phenyl-3,6-dihydro-2*H*-pyran-2-yl)phosphonate (3p):**

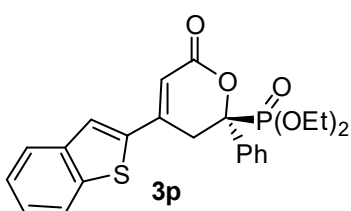

Light yellow solid, m.p. 136 - 138 °C, 30 mg, yield: 68%.

$[\alpha]_D^{22} = 179.1$  (c 1.0 CHCl<sub>3</sub>).

**<sup>1</sup>H NMR** (500 MHz, CDCl<sub>3</sub>) δ 7.82 - 7.76 (m, 2H), 7.68 (s, 1H), 7.59 (dd, *J* = 7.6, 1.9 Hz, 2H), 7.40 - 7.33 (m, 4H), 7.32 - 7.28 (m, 1H), 6.22 (d, *J* = 1.9 Hz, 1H), 4.31 - 4.18 (m, 2H), 3.96 - 3.85 (m, 1H), 3.80 - 3.61 (m, 3H), 1.36 (t, *J* = 7.0 Hz, 3H), 1.11 (t, *J* = 7.0 Hz, 3H).

**<sup>13</sup>C NMR** (101 MHz, CDCl<sub>3</sub>) δ 162.85 (d, *J* = 9.3 Hz), 145.93 (d, *J* = 13.8 Hz), 140.40 (s), 139.78 (d, *J* = 2.9 Hz), 139.41 (s), 136.25 (s), 128.62 (d, *J* = 2.4 Hz), 126.81 (s), 126.22 (s), 126.18 (s), 125.79 (s), 125.16 (s), 124.86 (s), 122.43 (s), 114.42 (s), 82.13 (d, *J* = 169.6 Hz), 64.61 (d, *J* = 7.4 Hz), 64.44 (d, *J* = 7.8 Hz), 31.75 (s), 16.49 (d, *J* = 5.6 Hz), 16.23 (d, *J* = 5.6 Hz).

**<sup>31</sup>P NMR** (162 MHz, CDCl<sub>3</sub>) δ 15.99 (s).

**HRMS** (ESI, *m/z*): Mass calcd. for C<sub>23</sub>H<sub>24</sub>O<sub>5</sub>PS [M+H]<sup>+</sup>, 443.1076; found 443.1070.

Enantiomeric ratio was measured by chiral phase HPLC (Chiralcel AD-H; 25 °C, IPA/Hexane = 20/80, 0.8 mL/min, 254 nm), Rt<sub>1</sub> (minor) = 12.7 min, Rt<sub>2</sub> (major) = 17.7 min; er = 95:5).

**Diethyl (*R*)-(6-oxo-4-phenyl-2-(*p*-tolyl)-3,6-dihydro-2*H*-pyran-2-yl)phosphonate (3q):**

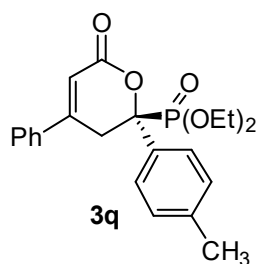

Light yellow oil, 34 mg, yield: 84%;

$[\alpha]_D^{26} = 119.2$  (c 1.0 CHCl<sub>3</sub>).

**<sup>1</sup>H NMR** (500 MHz, CDCl<sub>3</sub>) δ 7.50 - 7.46 (m, 2H), 7.42 (ddd, *J* = 9.3, 8.0, 3.8 Hz, 5H), 7.14 (d, *J* = 8.2 Hz, 2H), 6.21 (d, *J* = 2.2 Hz, 1H), 4.30 - 4.17 (m, 2H), 3.97 - 3.84 (m, 1H), 3.73 - 3.63 (m, 2H), 3.60 - 3.53 (m, 1H), 2.30 (d, *J* = 1.2 Hz, 3H), 1.34 (t, *J* = 7.1 Hz,

3H), 1.13 (t, *J* = 7.0 Hz, 3H).

**<sup>13</sup>C NMR** (126 MHz, CDCl<sub>3</sub>) δ 163.32 (d, *J* = 9.5 Hz), 152.78 (d, *J* = 13.3 Hz), 138.44 (s), 136.16 (s), 133.42 (s), 130.89 (s), 129.32 (s), 129.09 (s), 126.22 (d, *J* = 4.6 Hz), 126.19 (s),

115.12 (s), 82.93 (s), 81.57 (s), 64.45 (dd,  $J = 21.5, 7.4$  Hz), 32.04 (s), 21.12 (s), 16.46 (dd,  $J = 27.5, 5.3$  Hz), 16.31 - 16.20 (m).

**$^{31}\text{P}$  NMR** (202 MHz,  $\text{CDCl}_3$ )  $\delta$  17.05 (s).

**HRMS** (ESI,  $m/z$ ): Mass calcd. for  $\text{C}_{22}\text{H}_{26}\text{O}_5\text{P}$   $[\text{M}+\text{H}]^+$ , 401.1512; found 401.1502.

Enantiomeric ratio was measured by chiral phase HPLC (Chiralcel AD-H; 25 °C, IPA/Hexane = 20/80, 0.8 mL/min, 254 nm),  $\text{Rt}_1$  (minor) = 13.9 min,  $\text{Rt}_2$  (major) = 23.9 min; er = 96:4).

**Diethyl (*R*)-(4-(4-fluorophenyl)-6-oxo-2-(*p*-tolyl)-3,6-dihydro-2*H*-pyran-2-yl) phosphonate (3r):**

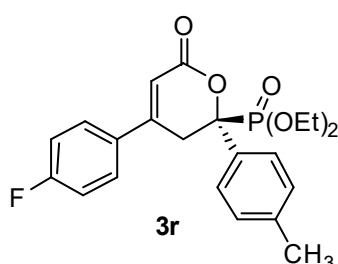

Light yellow oil, 29 mg, yield: 69%.

$[\alpha]_{\text{D}}^{25} = 115.5$  (c 1.0  $\text{CHCl}_3$ ).

**$^1\text{H}$  NMR** (500 MHz,  $\text{CDCl}_3$ )  $\delta$  7.50 - 7.43 (m, 2H), 7.41 (d,  $J = 8.3$  Hz, 2H), 7.13 (d,  $J = 7.2$  Hz, 2H), 7.07 (td,  $J = 8.7, 2.1$  Hz, 2H), 6.14 (s, 1H), 4.22 (dd,  $J = 14.2, 7.1$  Hz, 2H), 3.93 - 3.84 (m, 1H), 3.71 - 3.58 (m, 2H), 3.53 - 3.48 (m, 1H), 2.28 (s, 3H), 1.32 (t,  $J = 7.0$  Hz, 3H), 1.11 (t,  $J = 7.0$  Hz, 3H).

**$^{13}\text{C}$  NMR** (101 MHz,  $\text{CDCl}_3$ )  $\delta$  164.28 (d,  $J = 239.6$  Hz), 162.98 (d,  $J = 3.3$  Hz), 151.46 (d,  $J = 13.4$  Hz), 138.42 (d,  $J = 3.1$  Hz), 133.30 (d,  $J = 0.9$  Hz), 132.22 (dd,  $J = 3.2, 2.3$  Hz), 129.27 (d,  $J = 2.6$  Hz), 128.17 (d,  $J = 8.6$  Hz), 126.08 (d,  $J = 4.1$  Hz), 116.18 (d,  $J = 21.9$  Hz), 114.86 (s), 82.94 (s), 81.24 (s), 64.39 (dd,  $J = 18.6, 7.5$  Hz), 32.04 (s), 21.01 (s), 16.35 (dd,  $J = 22.5, 5.6$  Hz).

**$^{31}\text{P}$  NMR** (162 MHz,  $\text{CDCl}_3$ )  $\delta$  16.34 (s).

**$^{19}\text{F}$  NMR** (376 MHz,  $\text{CDCl}_3$ )  $\delta$  -108.89 (s).

**HRMS** (ESI,  $m/z$ ): Mass calcd. for  $\text{C}_{22}\text{H}_{25}\text{FO}_5\text{P}$   $[\text{M}+\text{H}]^+$ , 419.1418; found 419.1408.

Enantiomeric ratio was measured by chiral phase HPLC (Chiralcel AD-H; 25 °C, IPA/Hexane = 20/80, 0.8 mL/min, 254 nm),  $\text{Rt}_1$  (minor) = 19.1 min,  $\text{Rt}_2$  (major) = 38.3 min; er = 96:4).

**Diethyl (*R*)-(2-(4-fluorophenyl)-4-(naphthalen-2-yl)-6-oxo-3,6-dihydro-2*H*-pyran-2-yl) phosphonate (3s):**

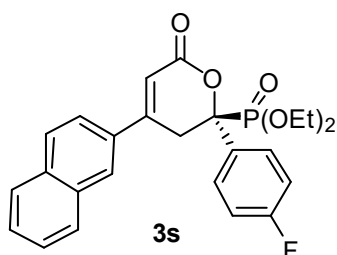

Light yellow oil, 40 mg, yield: 88%.

$[\alpha]_{\text{D}}^{26} = 214.2$  (c 1.0  $\text{CHCl}_3$ ).

**$^1\text{H}$  NMR** (400 MHz,  $\text{CDCl}_3$ )  $\delta$  8.02 (d,  $J = 1.5$  Hz, 1H), 7.94 - 7.88 (m, 1H), 7.85 - 7.82 (m, 2H), 7.59 - 7.51 (m, 3H), 7.48 (dd,  $J = 8.4, 2.2$  Hz, 2H), 7.15 (d,  $J = 8.4$  Hz, 2H), 6.36 (dd,  $J = 12.1, 1.5$  Hz, 1H), 4.35 - 4.22 (m, 2H), 3.97 - 3.91 (m, 1H), 3.80 - 3.68 (m, 3H), 2.30 (s, 3H), 1.38 (t,  $J = 7.1$  Hz, 3H), 1.15

(t,  $J = 7.1$  Hz, 3H).

**<sup>13</sup>C NMR** (101 MHz, CDCl<sub>3</sub>) δ 163.02 (d, *J* = 9.0 Hz), 162.79 (d, *J* = 248.5 Hz), 152.24 (d, *J* = 13.7 Hz), 138.42 (d, *J* = 3.1 Hz), 134.29 (s), 133.14 (dd, *J* = 17.7, 15.5 Hz), 129.29 (d, *J* = 2.6 Hz), 128.86 (s), 127.73 (d, *J* = 2.6 Hz), 127.03 (s), 126.59 (s), 126.21 (d, *J* = 4.1 Hz), 122.70 (s), 115.14 (s), 82.19 (d, *J* = 170.6 Hz), 64.56 (d, *J* = 7.6 Hz), 64.47 (d, *J* = 7.6 Hz), 31.78 (s), 21.04 (s), 16.62 (d, *J* = 5.6 Hz), 16.29 (d, *J* = 5.6 Hz).

**<sup>31</sup>P NMR** (202 MHz, CDCl<sub>3</sub>) δ 17.09 (s).

**HRMS** (ESI, *m/z*): Mass calcd. for C<sub>26</sub>H<sub>28</sub>O<sub>5</sub>P [M+H]<sup>+</sup>, 451.1669; found 451.1658.

Enantiomeric ratio was measured by chiral phase HPLC (Chiralcel AD-H; 25 °C, IPA/Hexane = 20/80, 0.8 mL/min, 254 nm), Rt<sub>1</sub> (minor) = 16.1 min, Rt<sub>2</sub> (major) = 22.3 min; er = 96:4).

### Dimethyl (*R*)-(6-oxo-2,4-diphenyl-3,6-dihydro-2*H*-pyran-2-yl)phosphonate (**3t**):

Light yellow oil, 18 mg, yield: 50%.

[α]<sub>D</sub><sup>26</sup> = 114.1 (c 1.0 CHCl<sub>3</sub>).

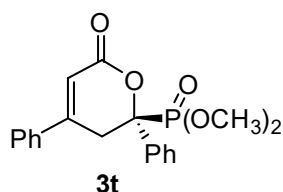

**<sup>1</sup>H NMR** (500 MHz, CDCl<sub>3</sub>) δ 7.57 (dd, *J* = 7.6, 1.8 Hz, 2H), 7.50 - 7.45 (m, 2H), 7.43 - 7.33 (m, 5H), 7.33 - 7.28 (m, 1H), 6.22 (d, *J* = 2.1 Hz, 1H), 3.88 (d, *J* = 10.4 Hz, 3H), 3.73 - 3.66 (m, 1H), 3.62 - 3.55 (m, 1H), 3.46 (d, *J* = 10.4 Hz, 3H).

**<sup>13</sup>C NMR** (101 MHz, CDCl<sub>3</sub>) δ 162.92 (d, *J* = 9.3 Hz), 152.64 (d, *J* = 13.3 Hz), 136.24 (s), 135.93 (d, *J* = 2.1 Hz), 130.93 (s), 129.07 (s), 128.70 (d, *J* = 2.7 Hz), 128.67 (d, *J* = 3.4 Hz), 126.17 (d, *J* = 4.2 Hz), 126.10 (s), 114.96 (s), 82.29 (d, *J* = 170.0 Hz), 54.95 (d, *J* = 7.3 Hz), 54.76 (d, *J* = 7.7 Hz), 31.98 (s).

**<sup>31</sup>P NMR** (162 MHz, CDCl<sub>3</sub>) δ 18.52 (s).

**HRMS** (ESI, *m/z*): Mass calcd. for C<sub>19</sub>H<sub>20</sub>O<sub>5</sub>P [M+H]<sup>+</sup>, 359.1043; found 359.1037.

Enantiomeric ratio was measured by chiral phase HPLC (Chiralcel AD-H; 25 °C, IPA/Hexane = 20/80, 0.8 mL/min, 254 nm), Rt<sub>1</sub> (minor) = 15.2 min, Rt<sub>2</sub> (major) = 23.8 min; er = 97:3).

### Diisopropyl (*R*)-(6-oxo-2,4-diphenyl-3,6-dihydro-2*H*-pyran-2-yl)phosphonate (**3u**):

Light yellow oil, 25.2 mg, yield: 61%.

[α]<sub>D</sub><sup>26</sup> = 100.0 (c 1.0 CHCl<sub>3</sub>).

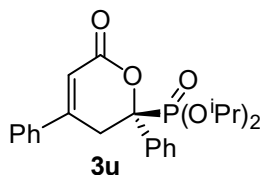

**<sup>1</sup>H NMR** (500 MHz, CDCl<sub>3</sub>) δ 7.56 (dd, *J* = 7.5, 2.0 Hz, 2H), 7.47 (dd, *J* = 7.4, 1.7 Hz, 2H), 7.43 - 7.37 (m, 3H), 7.33 (t, *J* = 7.6 Hz, 2H), 7.30 - 7.27 (m, 1H), 6.21 (d, *J* = 2.1 Hz, 1H), 4.82 (dq, *J* = 12.5, 6.3 Hz, 1H), 4.36 (dq, *J* = 12.5, 6.3 Hz, 1H), 3.68 (ddd, *J* = 17.8, 11.1, 2.2 Hz, 1H), 3.55 (dd, *J* = 17.8, 6.5 Hz, 1H), 1.35 (d, *J* = 6.2 Hz, 3H), 1.33 (d, *J* = 6.1 Hz, 3H), 1.22 (d, *J* = 6.1 Hz, 3H), 0.95 (d, *J* = 6.2 Hz, 3H).

**<sup>13</sup>C NMR** (126 MHz, CDCl<sub>3</sub>) δ 163.39 (d, *J* = 9.2 Hz), 152.72 (d, *J* = 13.2 Hz), 136.90 (s), 136.26 (s), 130.81 (s), 129.07 (s), 128.42 (d, *J* = 1.6 Hz), 128.38 (d, *J* = 2.1 Hz), 126.48 (d,

$J = 4.1$  Hz), 126.16 (s), 115.20 (s), 82.27 (d,  $J = 171.1$  Hz), 73.45 (d,  $J = 7.5$  Hz), 73.15 (d,  $J = 7.9$  Hz), 32.41 (s), 24.32 (d,  $J = 2.1$  Hz), 24.07 (d,  $J = 3.8$  Hz), 23.26 (d,  $J = 5.9$  Hz).

**$^{31}\text{P}$  NMR** (202 MHz,  $\text{CDCl}_3$ )  $\delta$  15.34 (s).

**HRMS** (ESI,  $m/z$ ): Mass calcd. for  $\text{C}_{23}\text{H}_{28}\text{O}_5\text{P}$   $[\text{M}+\text{H}]^+$ , 415.1669; found 415.1657.

Enantiomeric ratio was measured by chiral phase HPLC (Chiralcel OD-H; 25 °C, IPA/Hexane = 20/80, 0.6 mL/min, 254 nm),  $\text{Rt}_1$  (major) = 8.0 min,  $\text{Rt}_2$  (minor) = 9.4 min; er = 97:3).

### Diethyl (S)-(6-oxo-2-phenethyl-4-phenyl-3,6-dihydro-2H-pyran-2-yl)phosphonate

(3v):

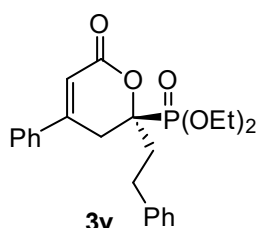

Light yellow oil, 8 mg, yield: 19%.

$[\alpha]_{\text{D}}^{26} = 84.2$  (c 0.5  $\text{CHCl}_3$ ).

**$^1\text{H}$  NMR** (400 MHz,  $\text{CDCl}_3$ )  $\delta$  7.57 - 7.52 (m, 2H), 7.48 - 7.43 (m, 3H), 7.31 - 7.26 (m, 2H), 7.19 (dd,  $J = 5.2, 2.4$  Hz, 3H), 6.37 (d,  $J = 1.4$  Hz, 1H), 4.29 - 4.16 (m, 4H), 3.46 - 3.36 (m, 1H), 3.02 (ddd,  $J = 20.2, 18.5, 1.6$  Hz, 1H), 2.93 - 2.83 (m, 2H), 2.45 - 2.23 (m, 2H),

1.37 (t,  $J = 7.1$  Hz, 3H), 1.32 (t,  $J = 7.1$  Hz, 3H).

**$^{13}\text{C}$  NMR** (101 MHz,  $\text{CDCl}_3$ )  $\delta$  163.19 (d,  $J = 4.5$  Hz), 152.43 (d,  $J = 6.6$  Hz), 140.87 (s), 136.01 (s), 130.88 (s), 129.09 (s), 128.61 (s), 128.40 (s), 126.25 (s), 126.13 (s), 114.33 (s), 81.18 (d,  $J = 168.0$  Hz), 63.85 (d,  $J = 7.2$  Hz), 63.76 (d,  $J = 7.6$  Hz), 38.02 (d,  $J = 2.3$  Hz), 30.37 (d,  $J = 3.1$  Hz), 29.81 (d,  $J = 5.3$  Hz), 16.55 (s), 16.50 (s).

**$^{31}\text{P}$  NMR** (202 MHz,  $\text{CDCl}_3$ )  $\delta$  21.06 (s).

**HRMS** (ESI,  $m/z$ ): Mass calcd. for  $\text{C}_{23}\text{H}_{28}\text{O}_5\text{P}$   $[\text{M}+\text{H}]^+$ , 415.1669; found 415.1656.

Enantiomeric ratio was measured by chiral phase HPLC (Chiralcel AD-H; 25 °C, IPA/Hexane = 20/80, 0.6 mL/min, 254 nm),  $\text{Rt}_1$  (minor) = 19.6 min,  $\text{Rt}_2$  (major) = 32.5 min; er = 97:3).

### Diethyl (R)-(4-cyclohexyl-6-oxo-2-phenyl-3,6-dihydro-2H-pyran-2-yl)phosphonate

(3w):

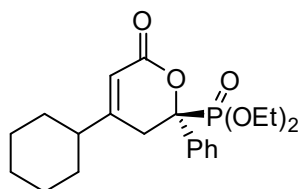

Colorless oil, 7 mg, yield: 17%.

$[\alpha]_{\text{D}}^{26} = 294.0$  (c 1.0  $\text{CHCl}_3$ ).

**$^1\text{H}$  NMR** (400 MHz,  $\text{CDCl}_3$ )  $\delta$  7.56 - 7.48 (m, 2H), 7.41 - 7.30 (m, 3H), 5.68 (s, 1H), 4.29 - 4.20 (m, 2H), 4.16 (ddd,  $J = 14.2, 9.0, 7.1$  Hz, 1H), 3.92 - 3.78 (m, 1H), 3.61 (ddd,  $J = 10.1, 8.1, 7.1$  Hz,

1H), 3.29 (ddd,  $J = 17.8, 11.2, 2.1$  Hz, 1H), 3.06 (dd,  $J = 17.8, 6.6$  Hz, 1H), 2.00 (dd,  $J = 15.7, 7.3$  Hz, 1H), 1.84 - 1.73 (m, 2H), 1.73 - 1.60 (m, 3H), 1.35 (t,  $J = 7.1$  Hz, 3H), 1.29 - 1.23 (m, 2H), 1.22 - 1.15 (m, 2H), 1.08 (t,  $J = 7.1$  Hz, 3H).

**$^{13}\text{C}$  NMR** (101 MHz,  $\text{CDCl}_3$ )  $\delta$  163.25 (d,  $J = 8.9$  Hz), 162.81 (d,  $J = 12.4$  Hz), 136.61 (s), 128.35 (s), 128.33 (s), 126.20 (d,  $J = 4.1$  Hz), 114.11 (s), 81.99 (d,  $J = 168.9$  Hz), 64.31 (t,

$J = 7.1$  Hz), 44.87 (d,  $J = 1.6$  Hz), 32.23 (s), 30.19 (s), 29.91 (s), 26.15 - 25.50 (m), 16.46 (d,  $J = 5.6$  Hz), 16.18 (d,  $J = 5.6$  Hz).

$^{31}\text{P}$  NMR (162 MHz,  $\text{CDCl}_3$ )  $\delta$  16.46 (s).

**HRMS** (ESI,  $m/z$ ): Mass calcd. for  $\text{C}_{21}\text{H}_{30}\text{O}_5\text{P}$   $[\text{M}+\text{H}]^+$ , 393.1825; found 393.1813.

Enantiomeric ratio was measured by chiral phase HPLC (Chiralcel AD-H; 25 °C, IPA/Hexane = 20/80, 0.6 mL/min, 254 nm),  $R_{t1}$  (minor) = 10.8 min,  $R_{t2}$  (major) = 14.0 min; er = 98:2).

## IX. NMR spectra of intermediates & products

### 1m-3 $^1\text{H}$ NMR

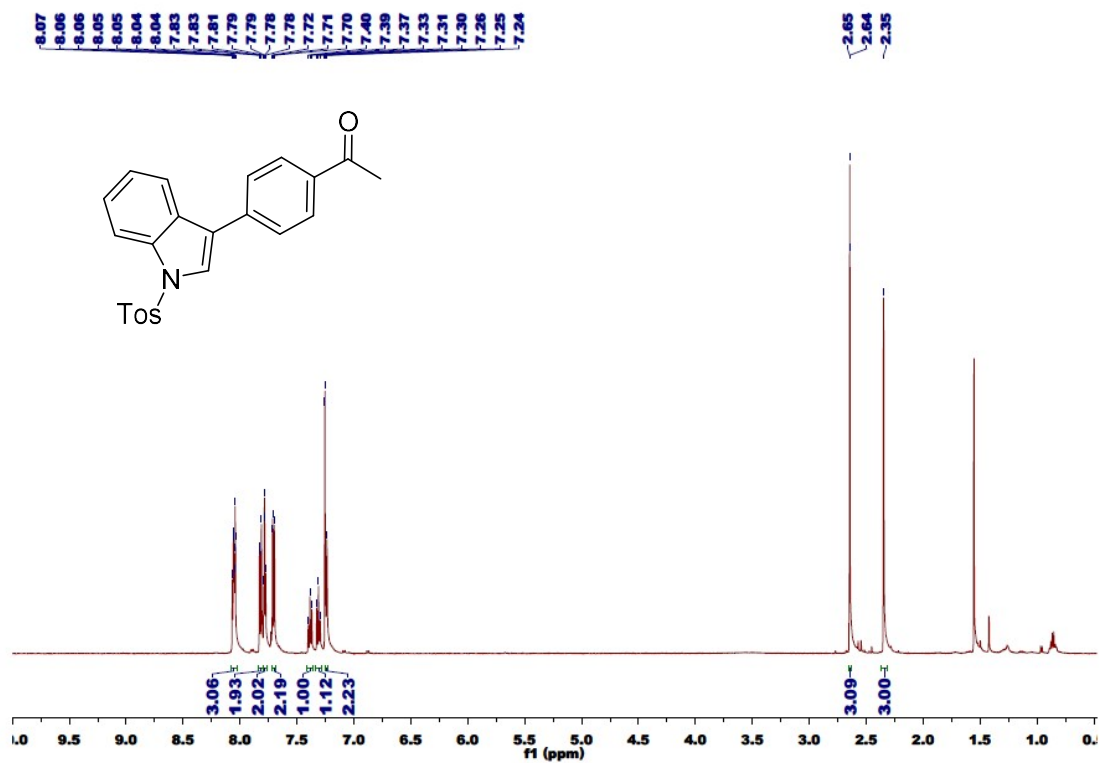

### 1m-3 $^{13}\text{C}$ NMR

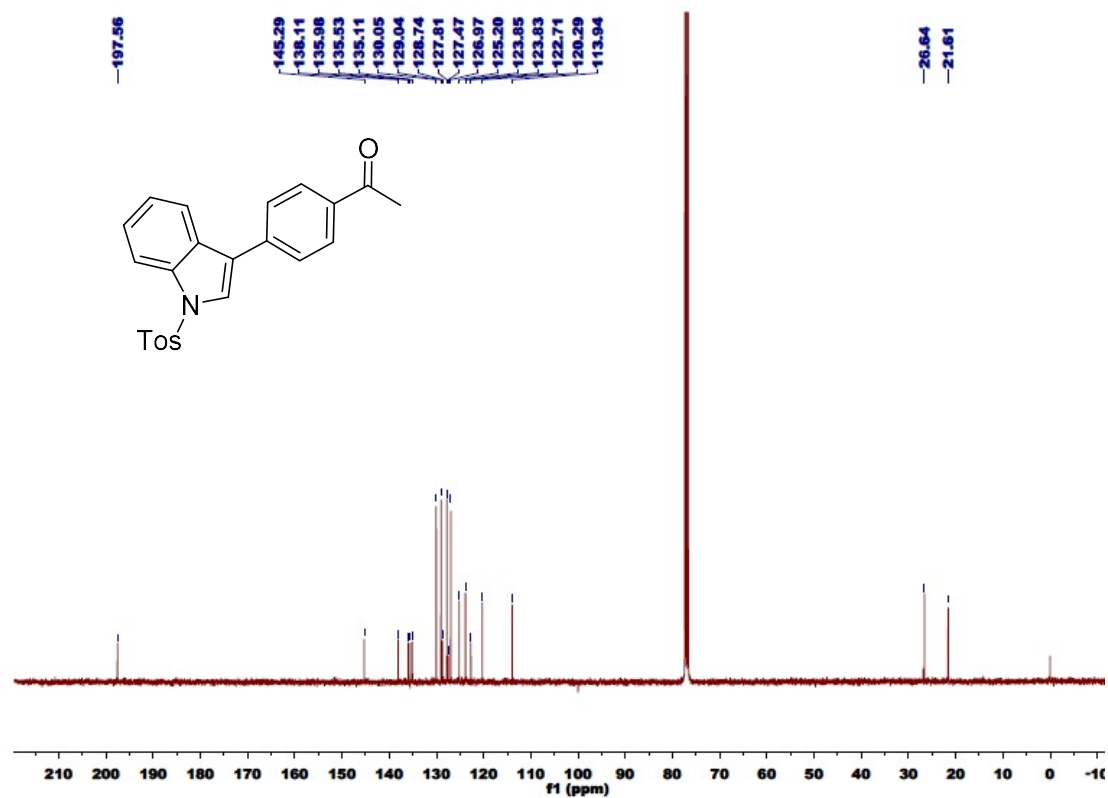



# 1m <sup>1</sup>H NMR

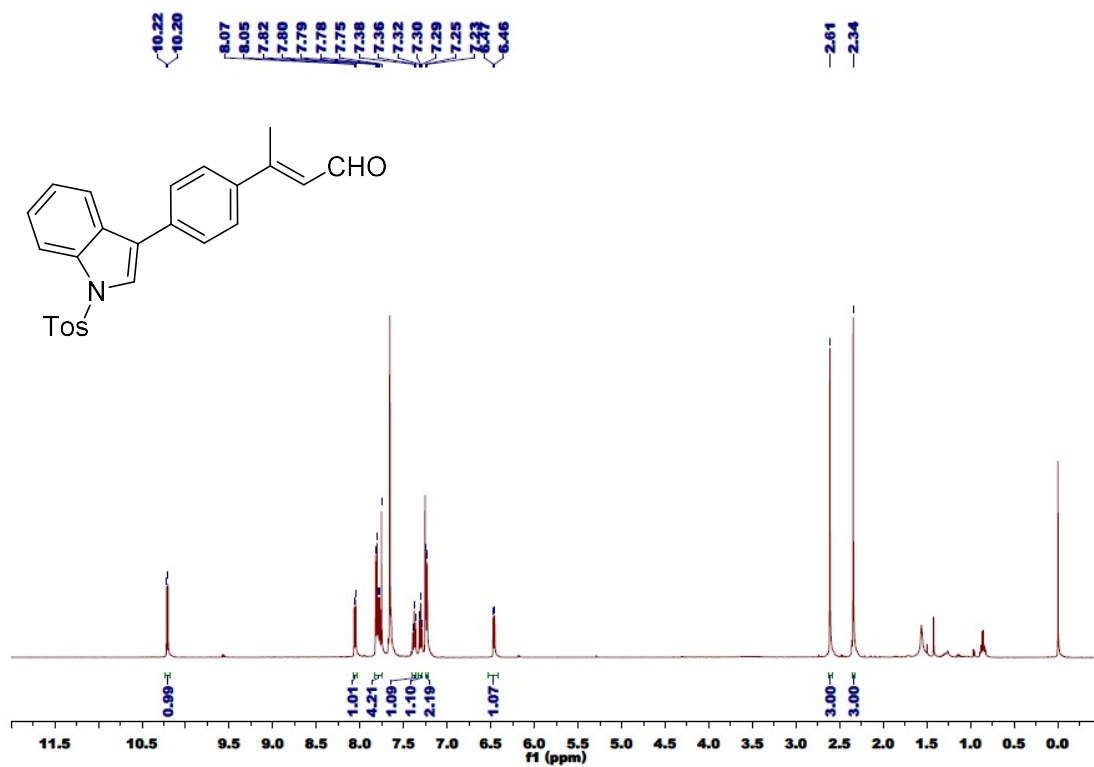

# 1m <sup>13</sup>C NMR

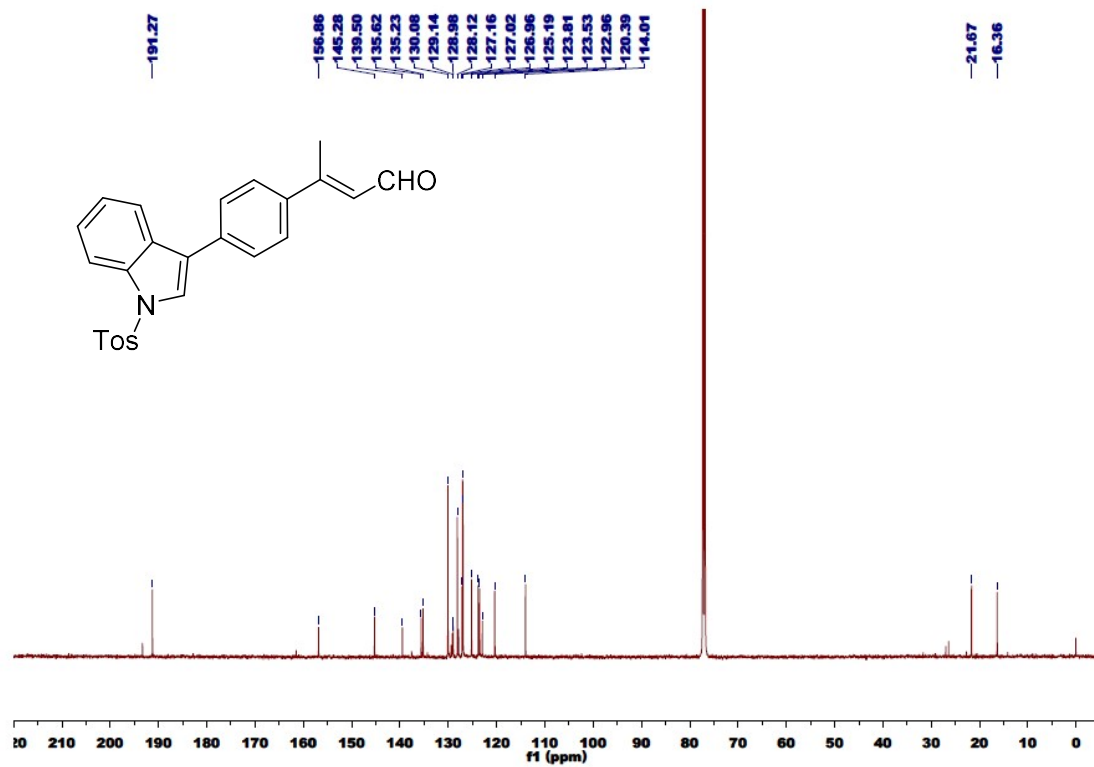

### 3a <sup>1</sup>H NMR

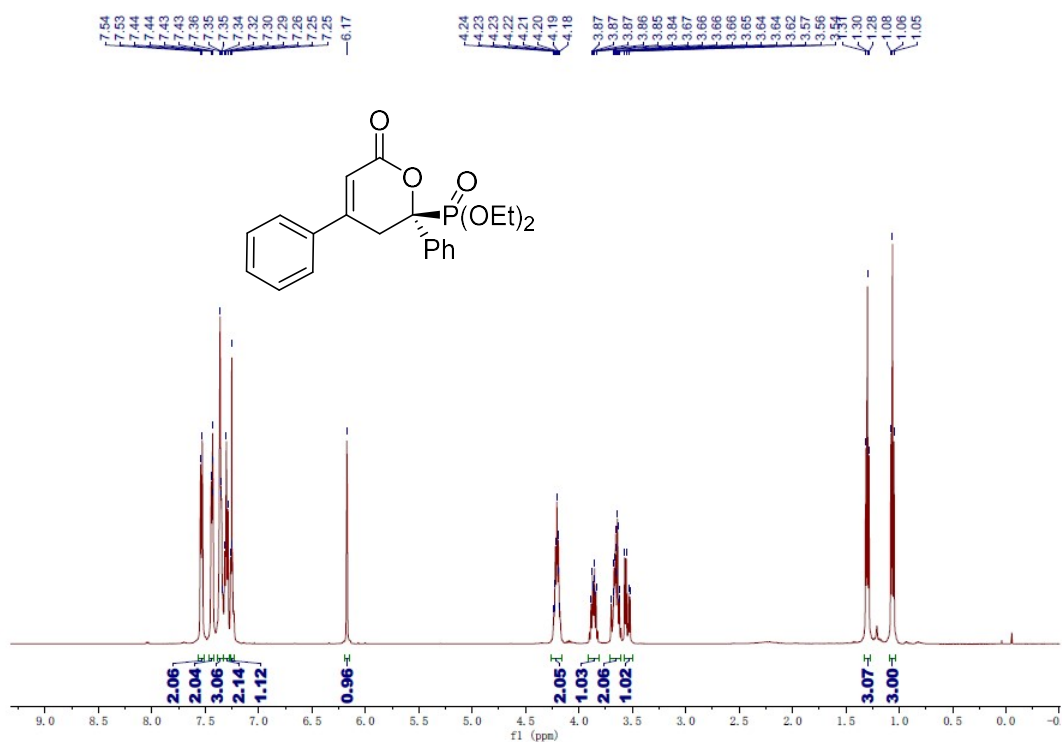

### 3a <sup>13</sup>C NMR

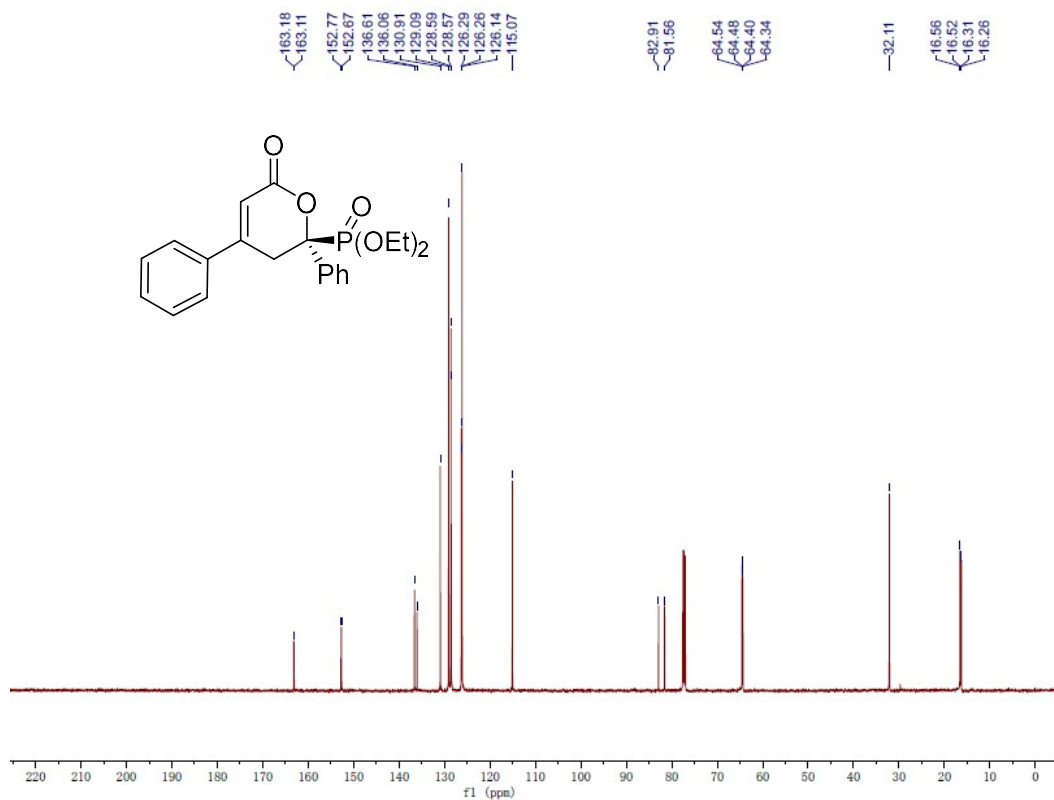

### 3a $^{31}\text{P}$ NMR

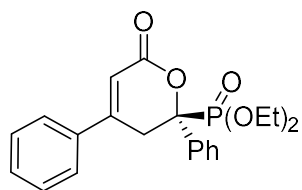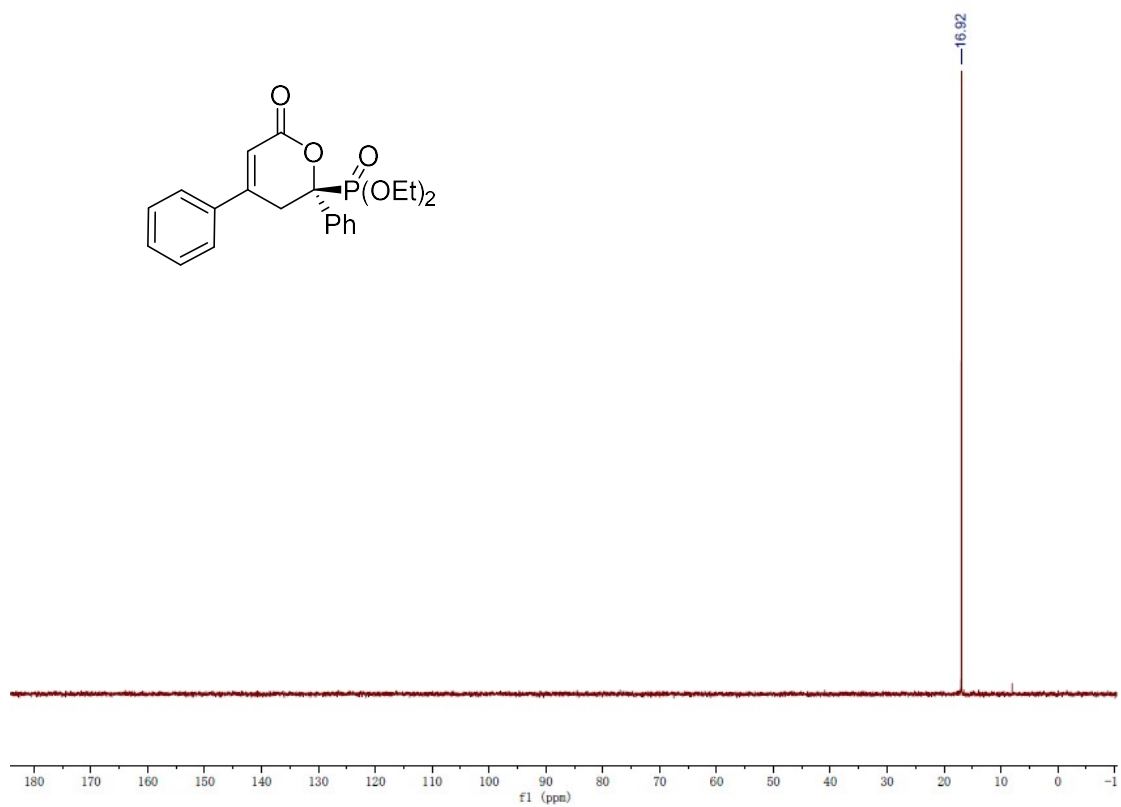

### 3b <sup>1</sup>H NMR

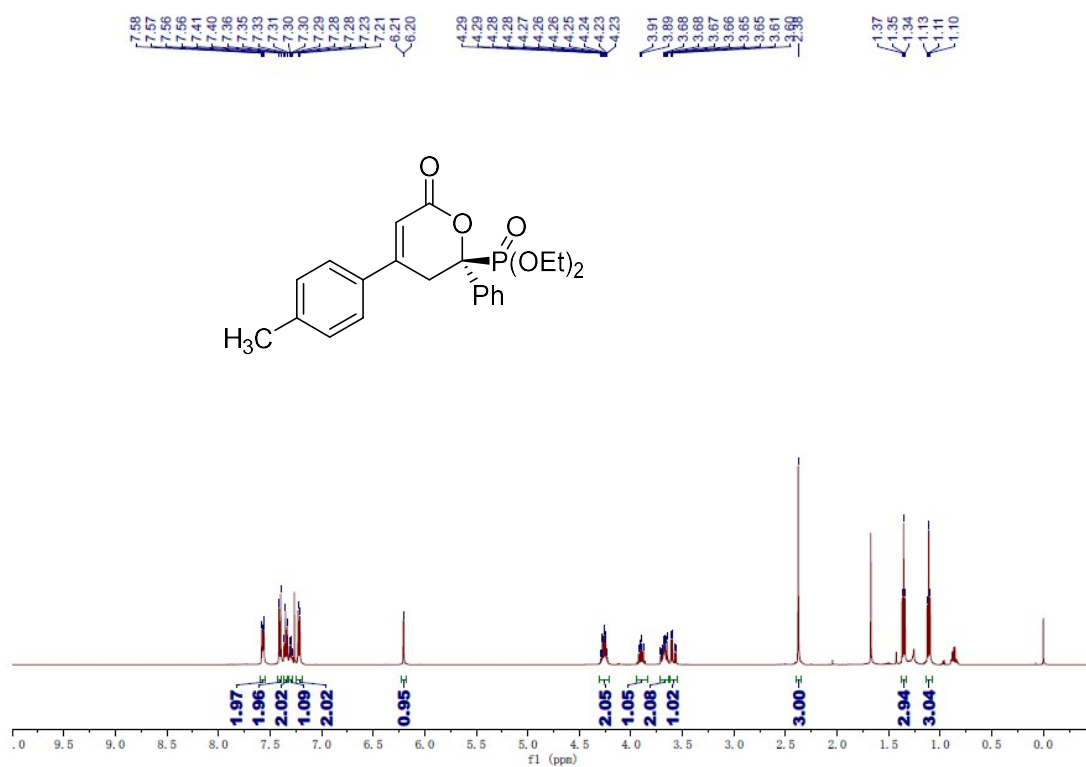

### 3b <sup>13</sup>C NMR

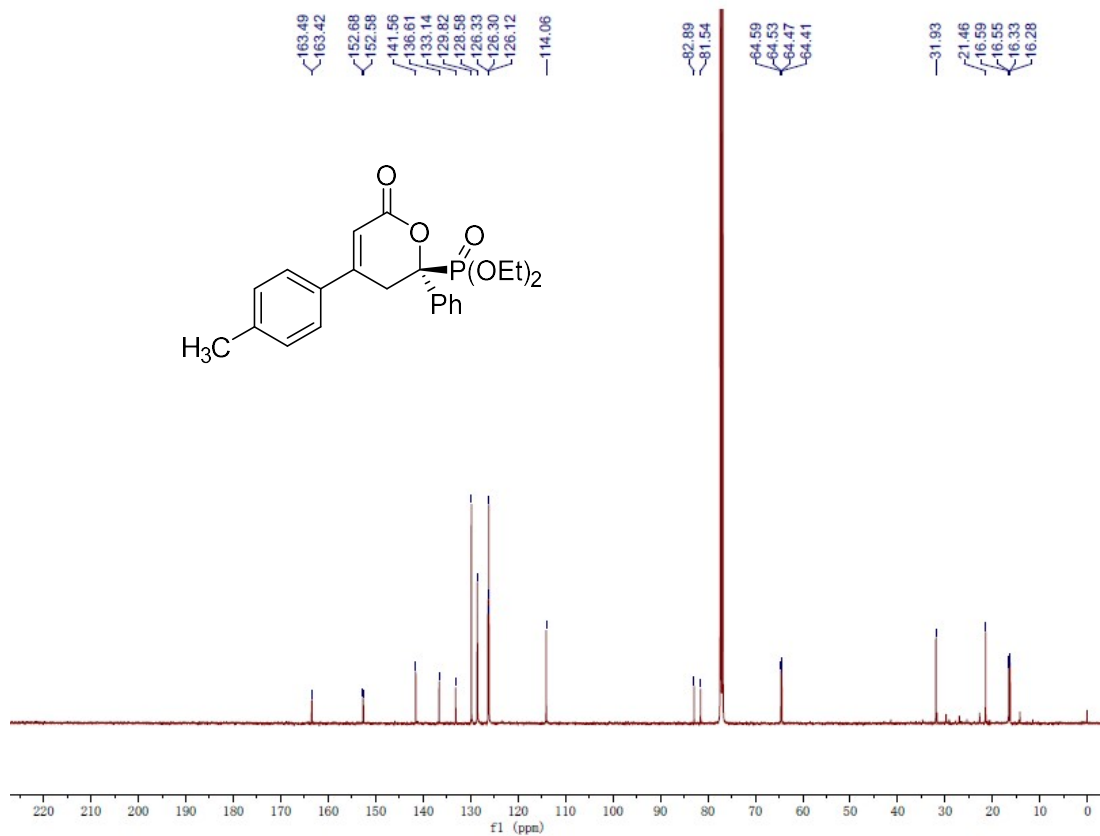

### 3b $^{31}\text{P}$ NMR

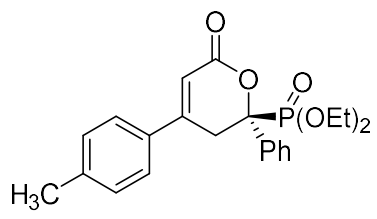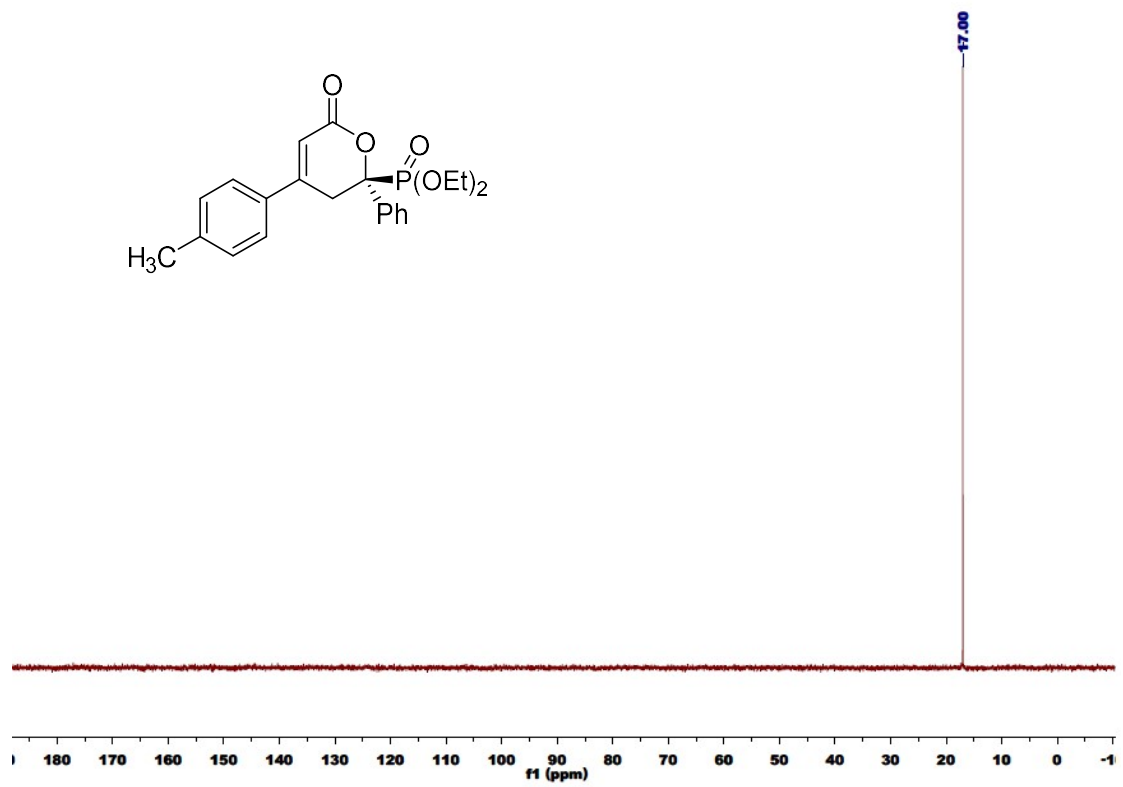

### 3c <sup>1</sup>H NMR

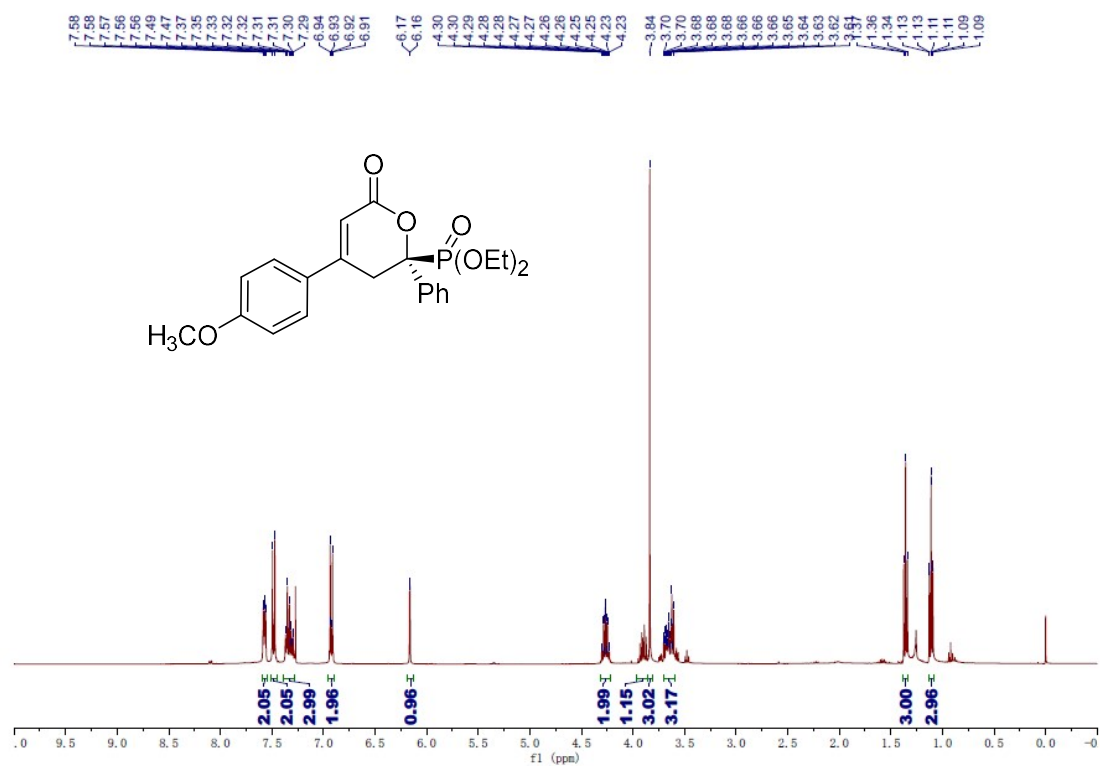

### 3c <sup>13</sup>C NMR

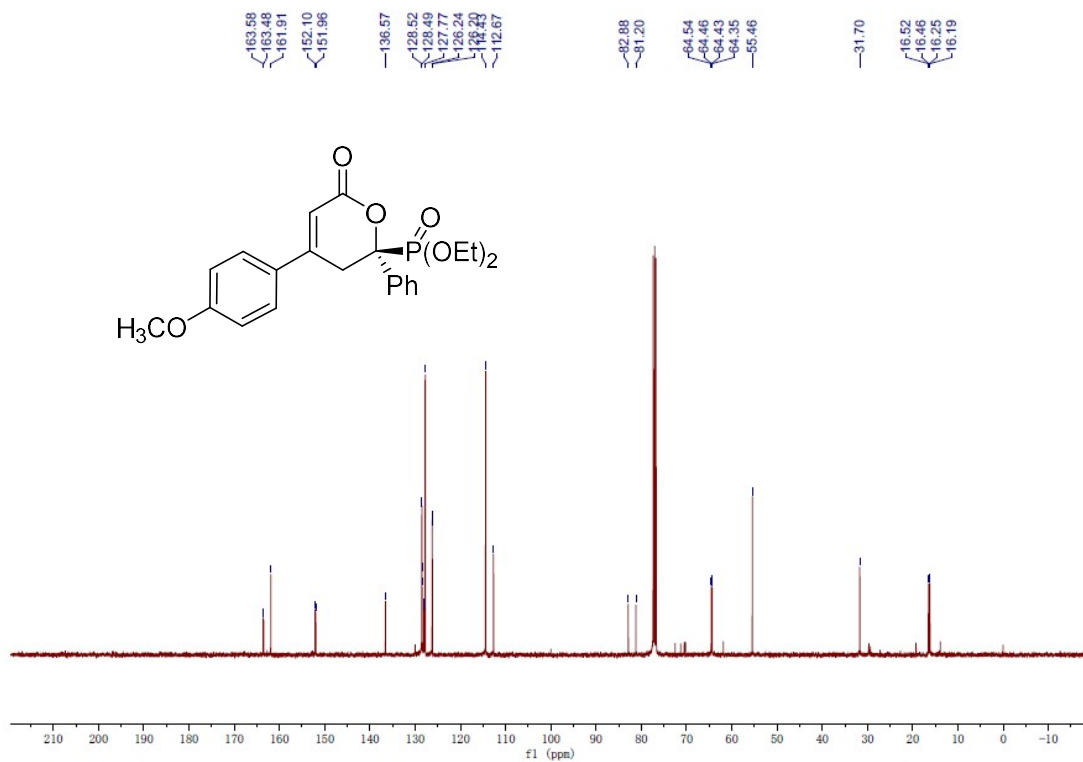

### 3c $^{31}\text{P}$ NMR

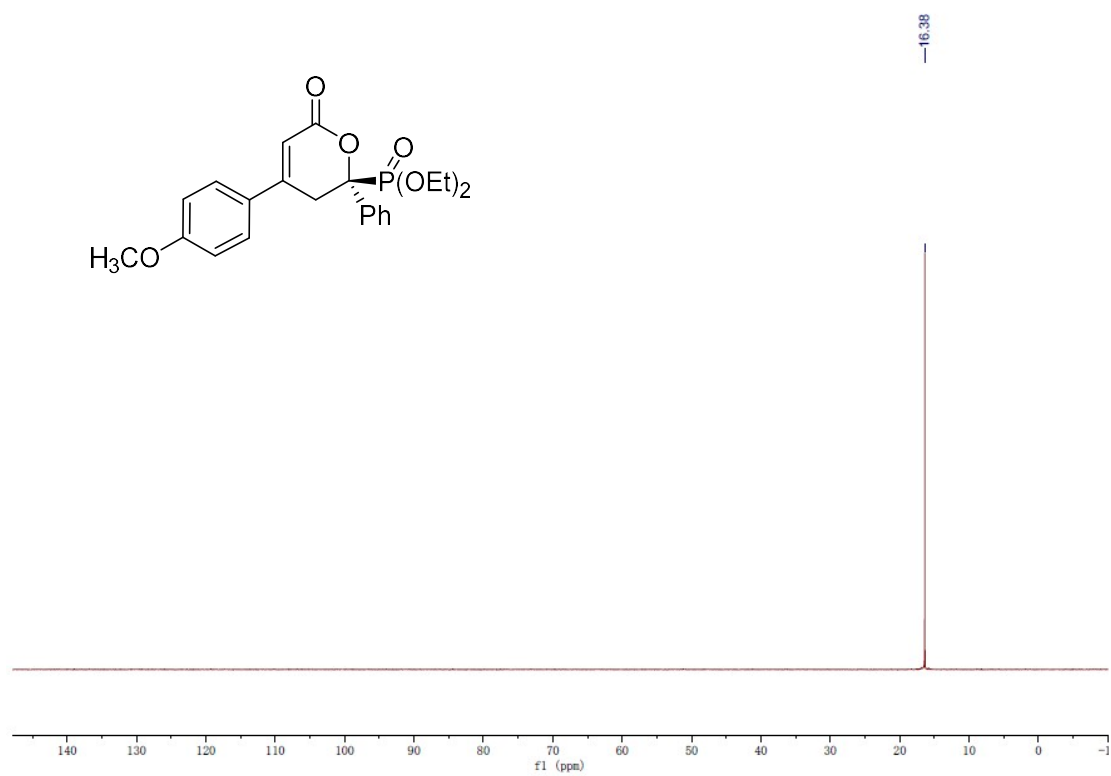

### 3d <sup>1</sup>H NMR

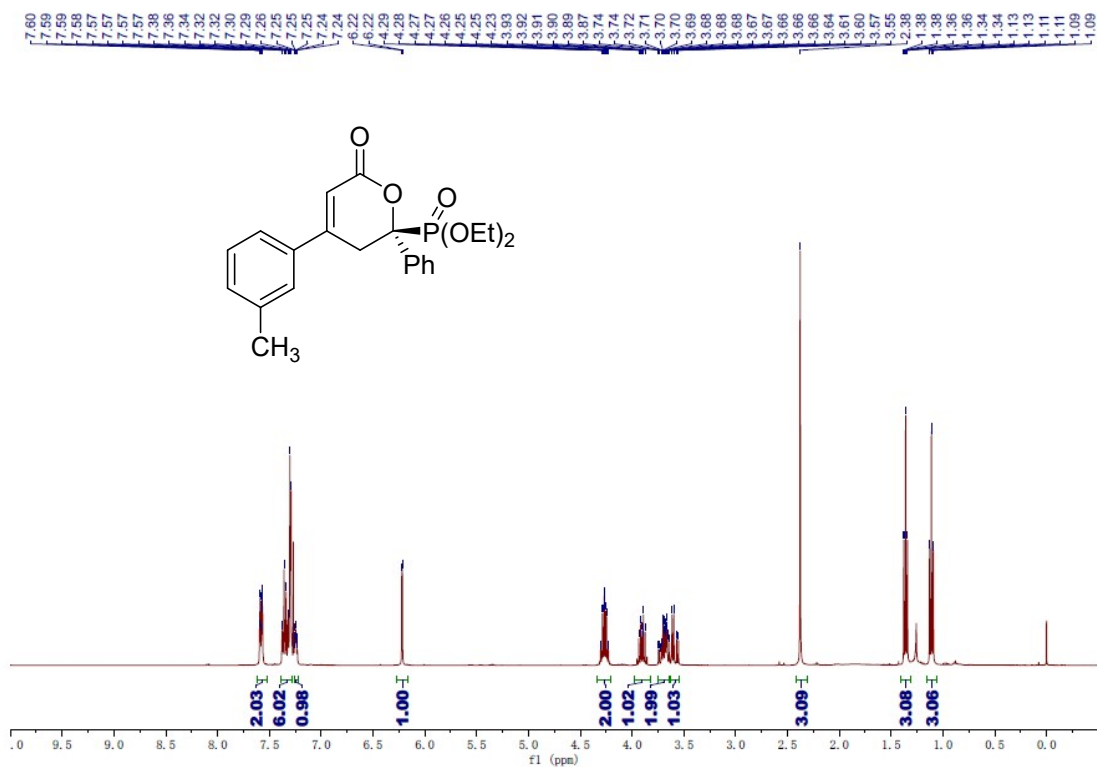

### 3d <sup>13</sup>C NMR

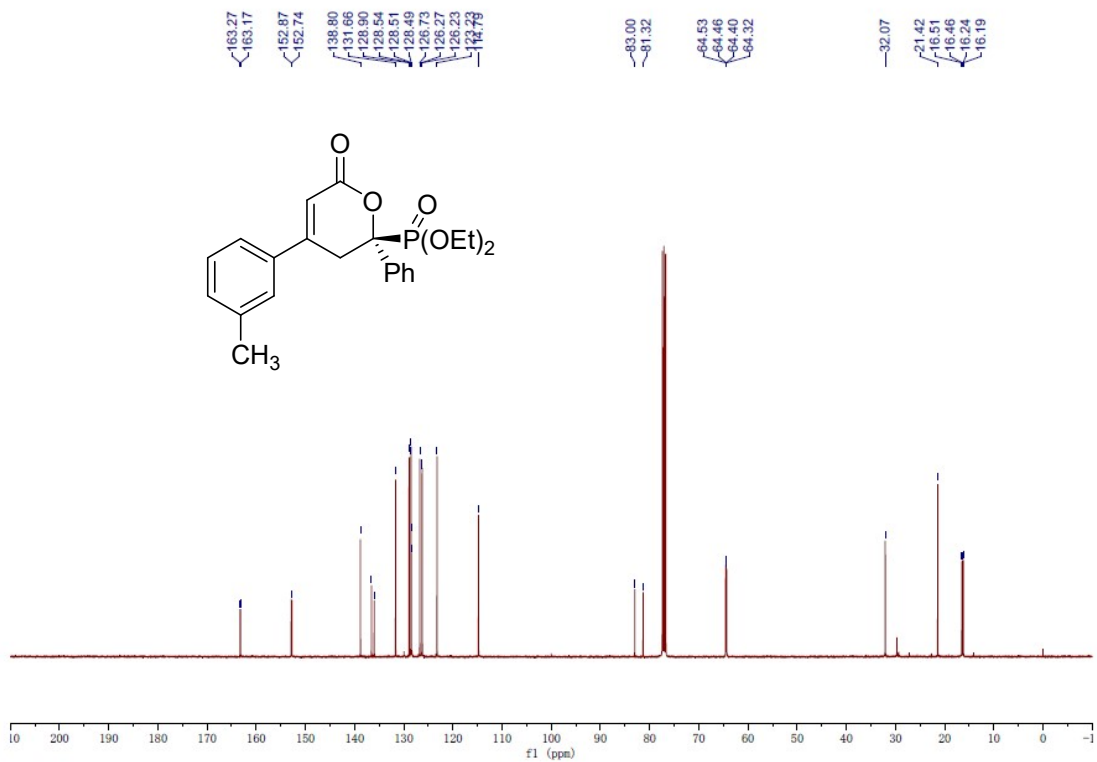



### 3d $^{31}\text{P}$ NMR

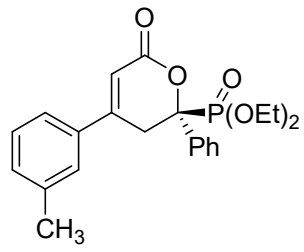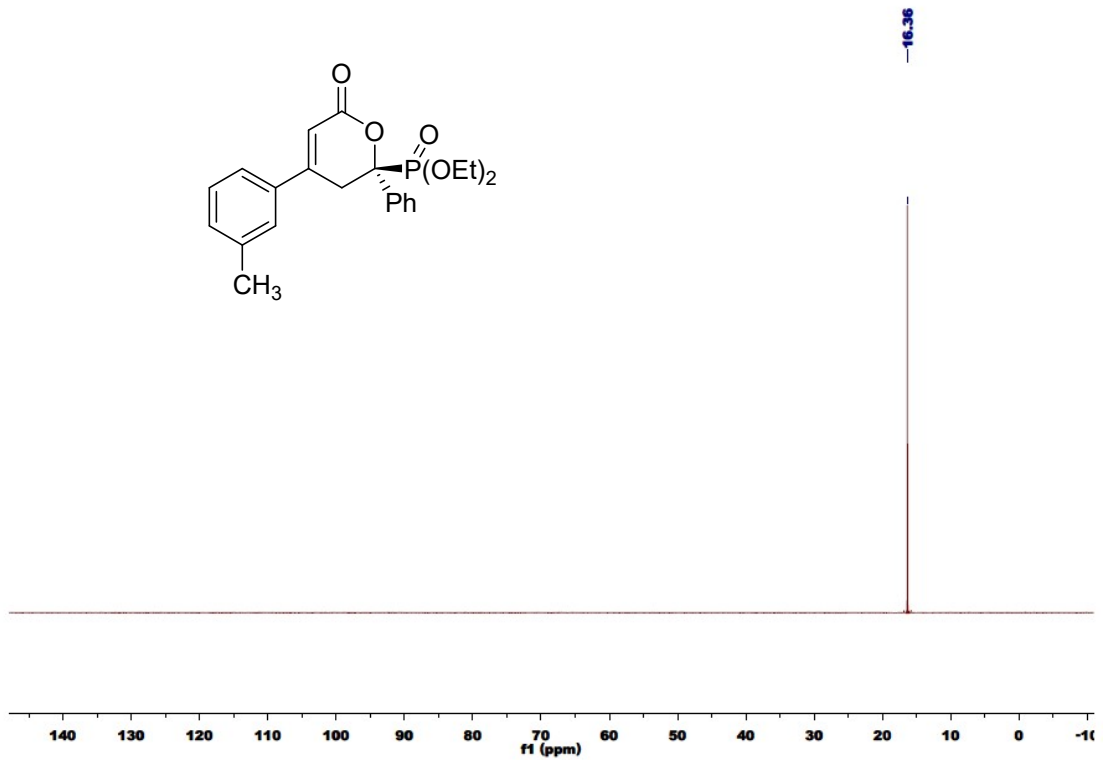

### 3e <sup>1</sup>H NMR

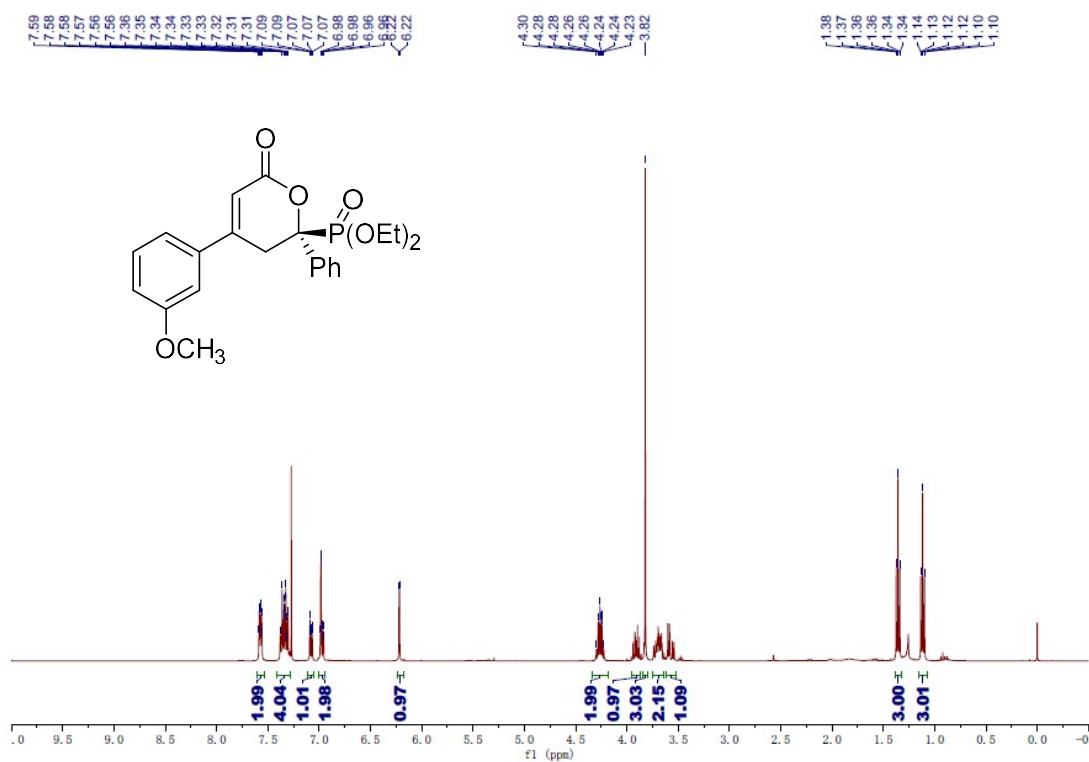

### 3e <sup>13</sup>C NMR

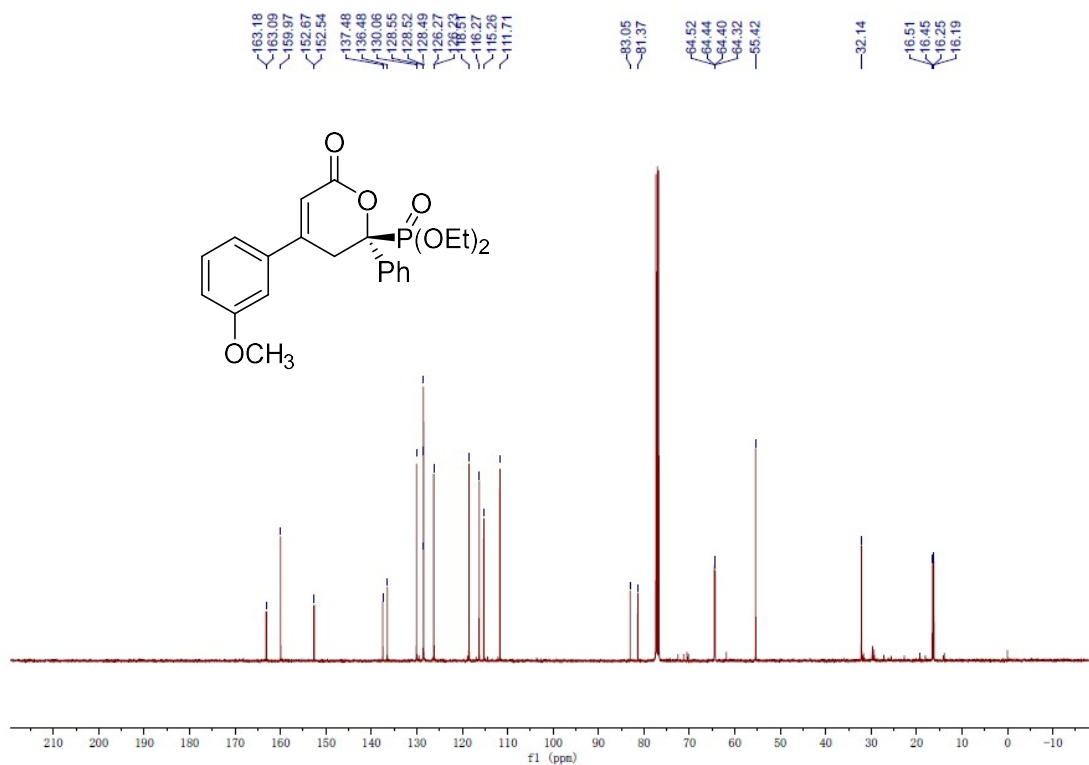

### 3e $^{31}\text{P}$ NMR

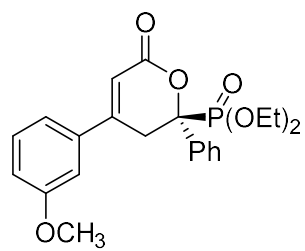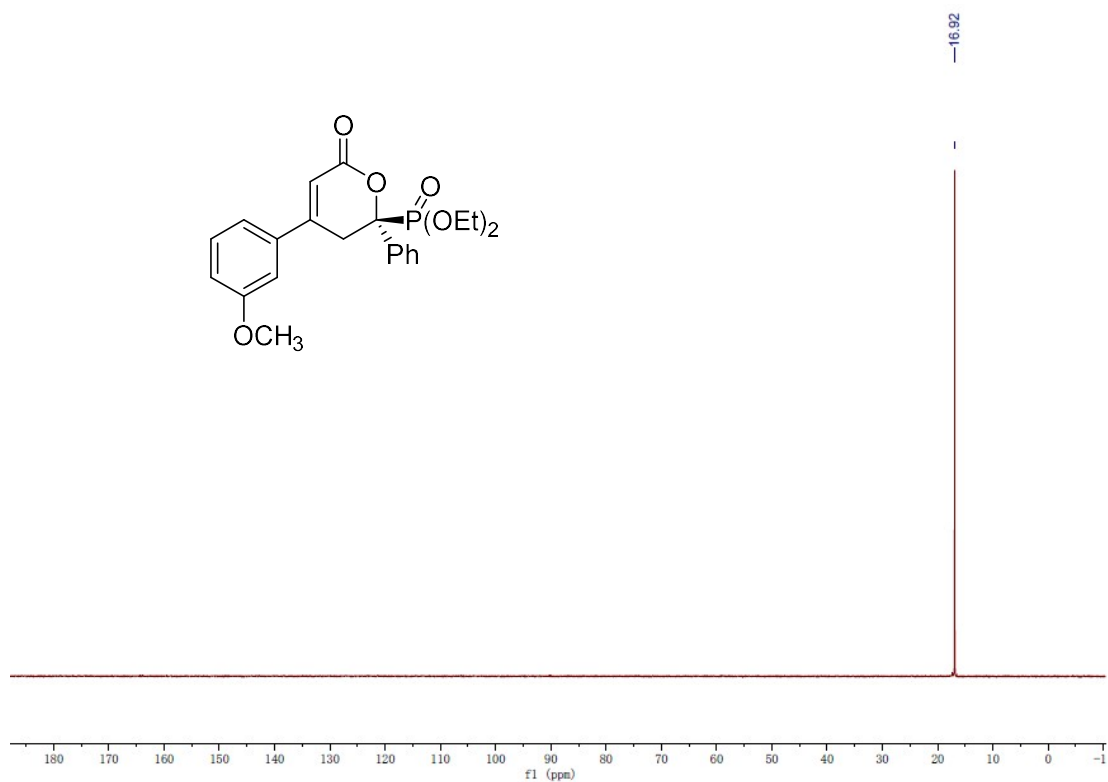

### 3f <sup>1</sup>H NMR

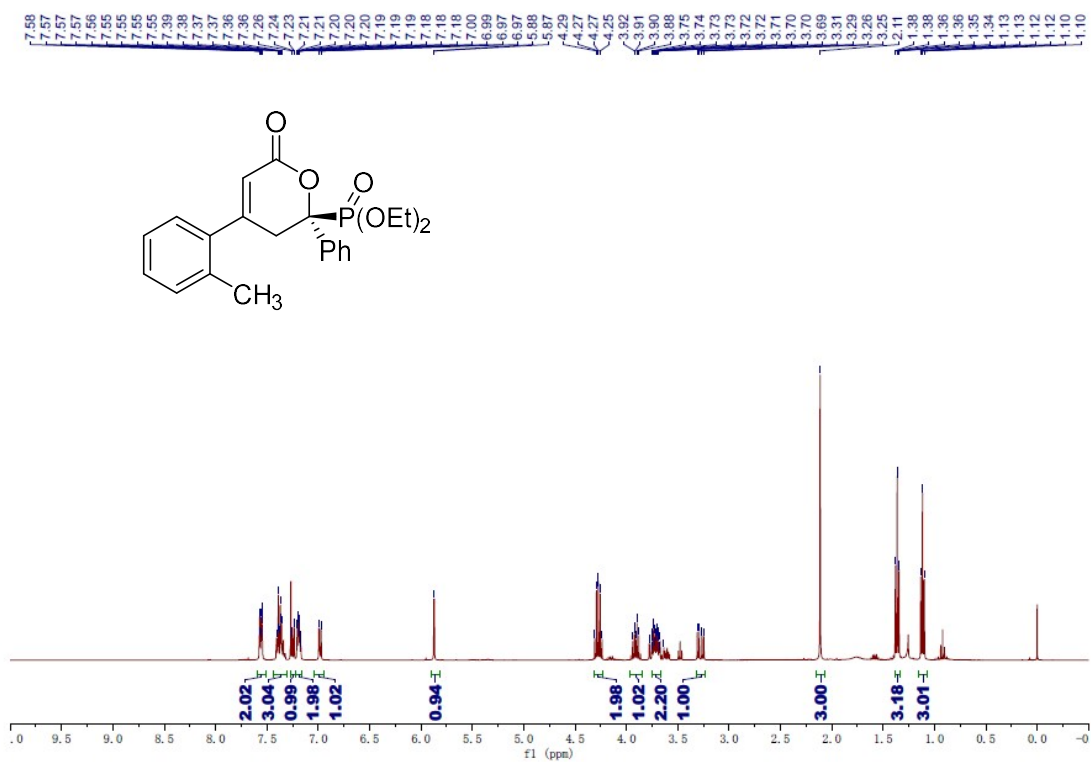

### 3f <sup>13</sup>C NMR

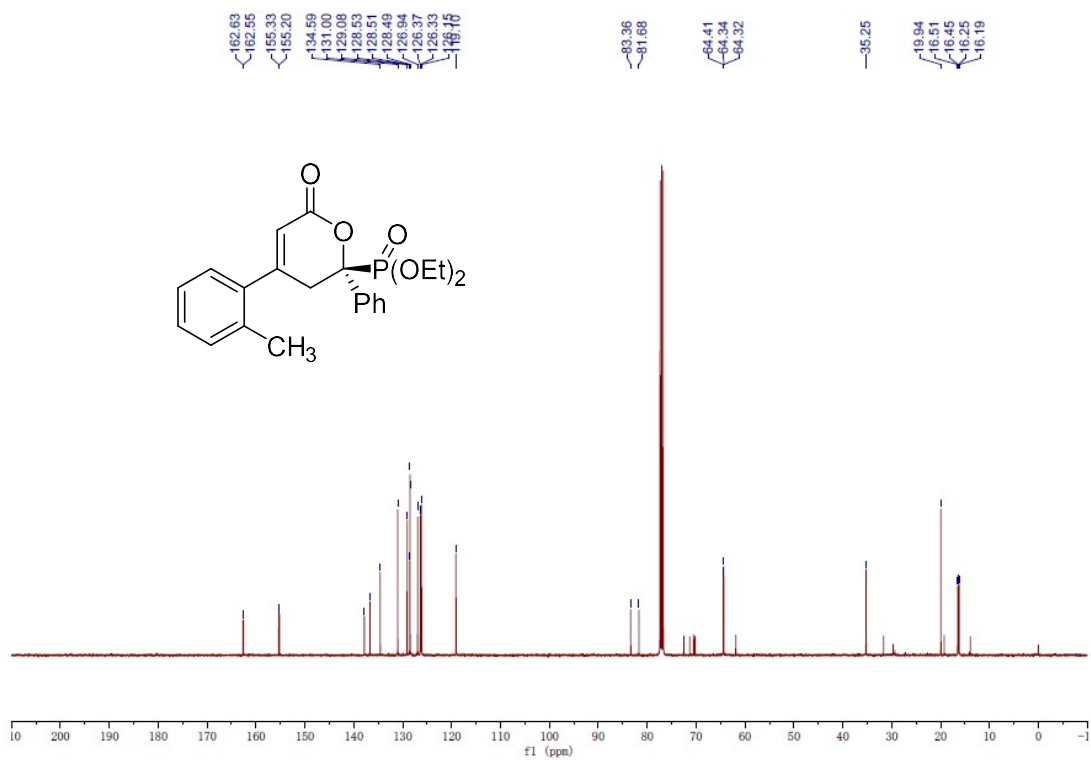

### 3f $^{31}\text{P}$ NMR

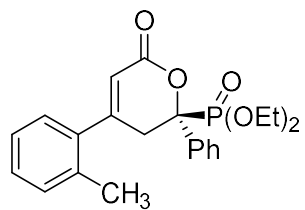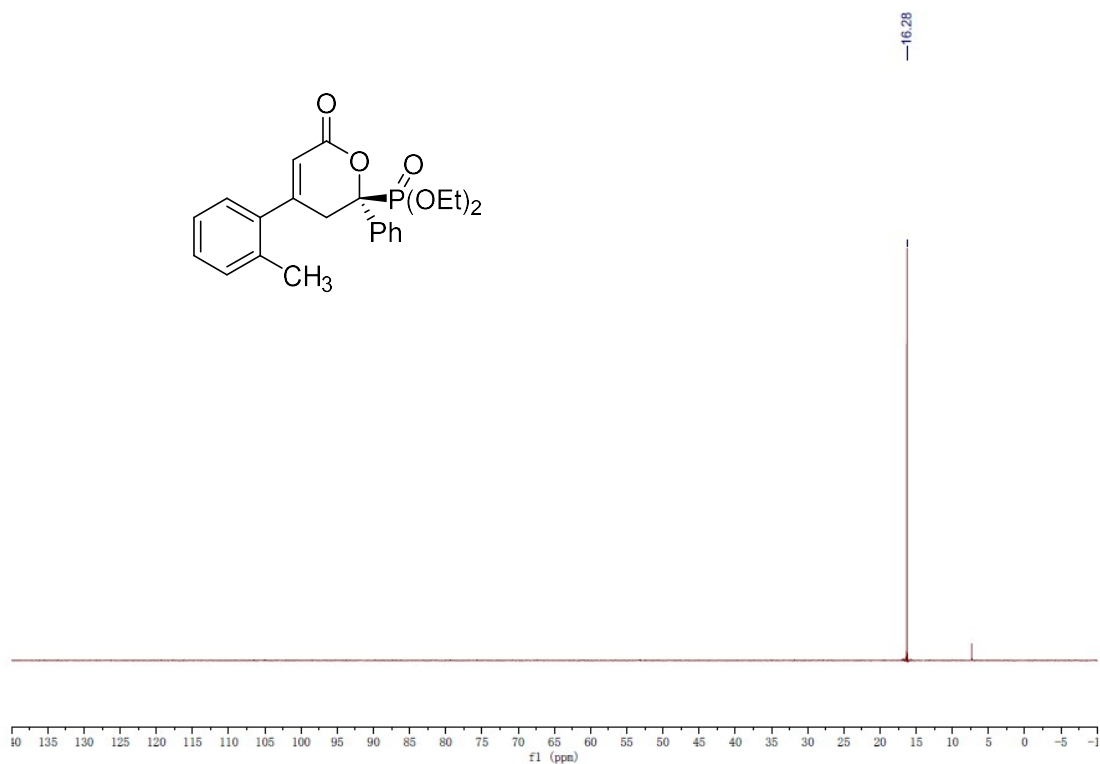

### 3g <sup>1</sup>H NMR

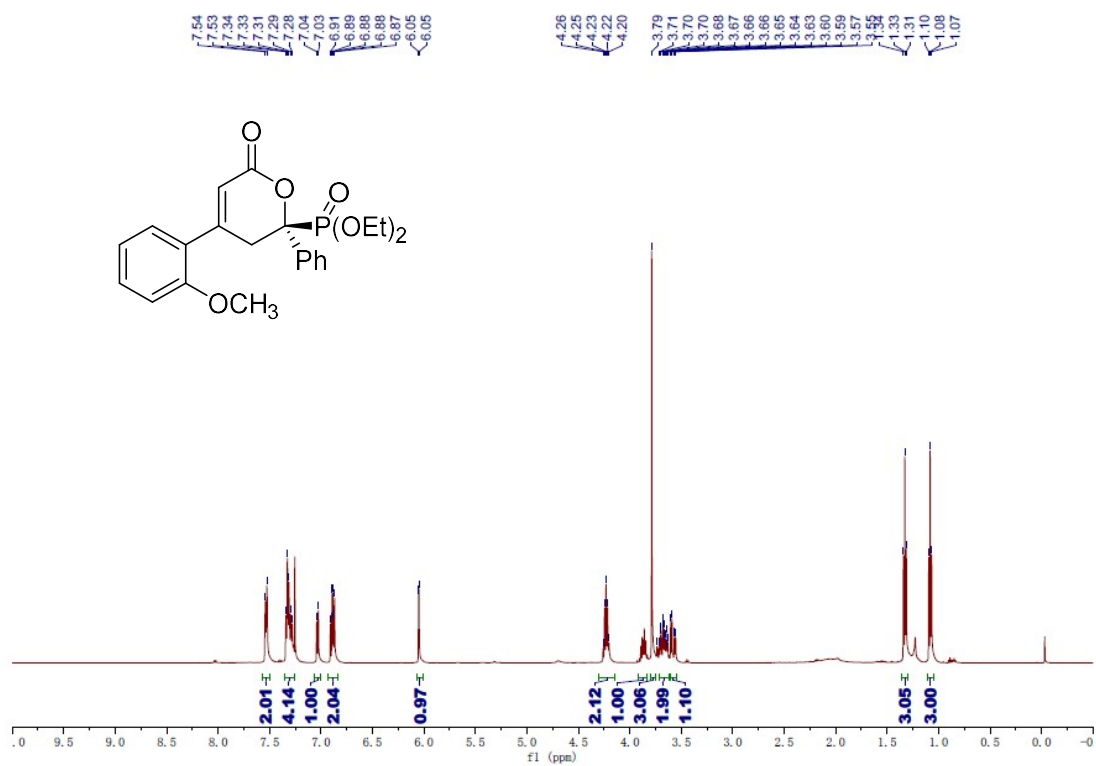

### 3g <sup>13</sup>C NMR

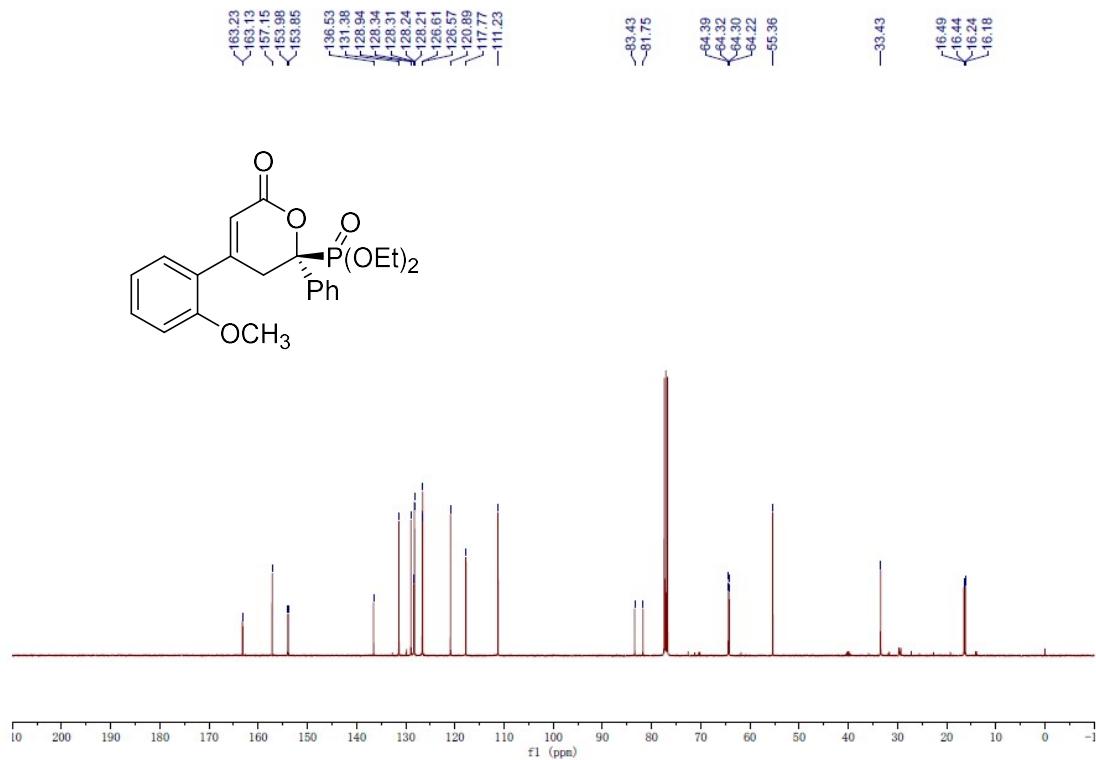

### 3g $^{31}\text{P}$ NMR

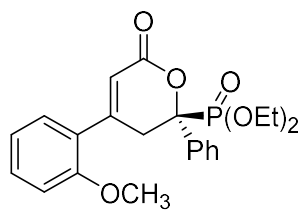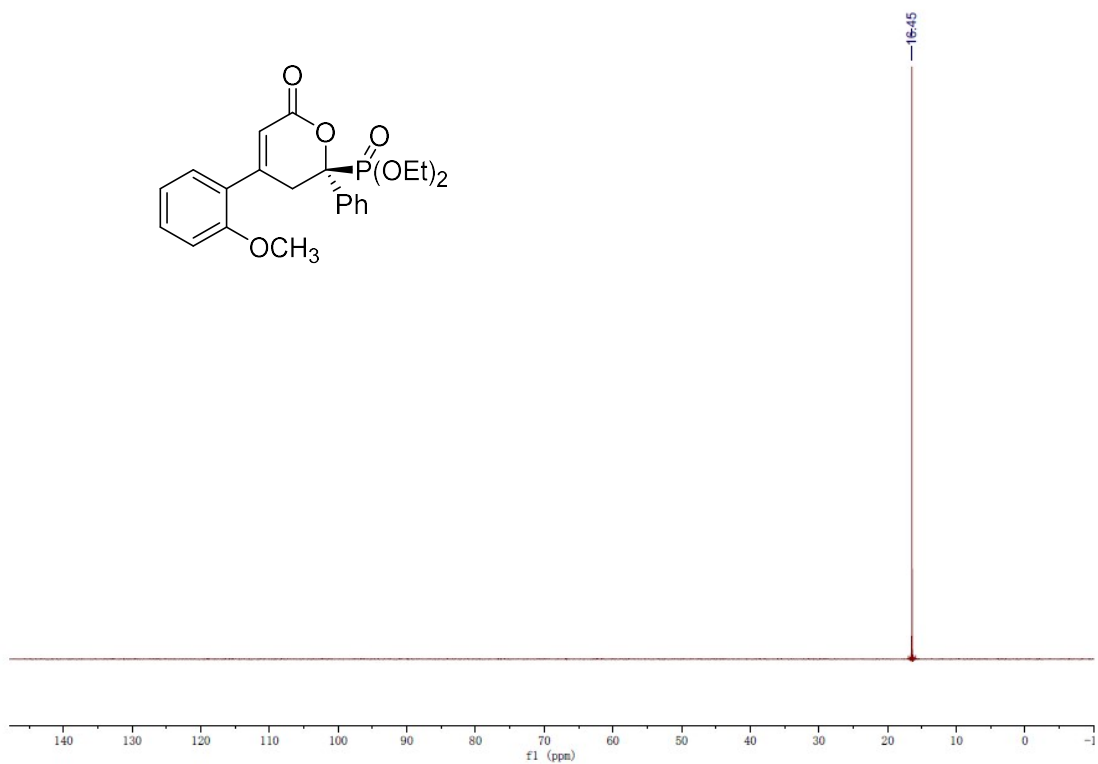

### 3h <sup>1</sup>H NMR

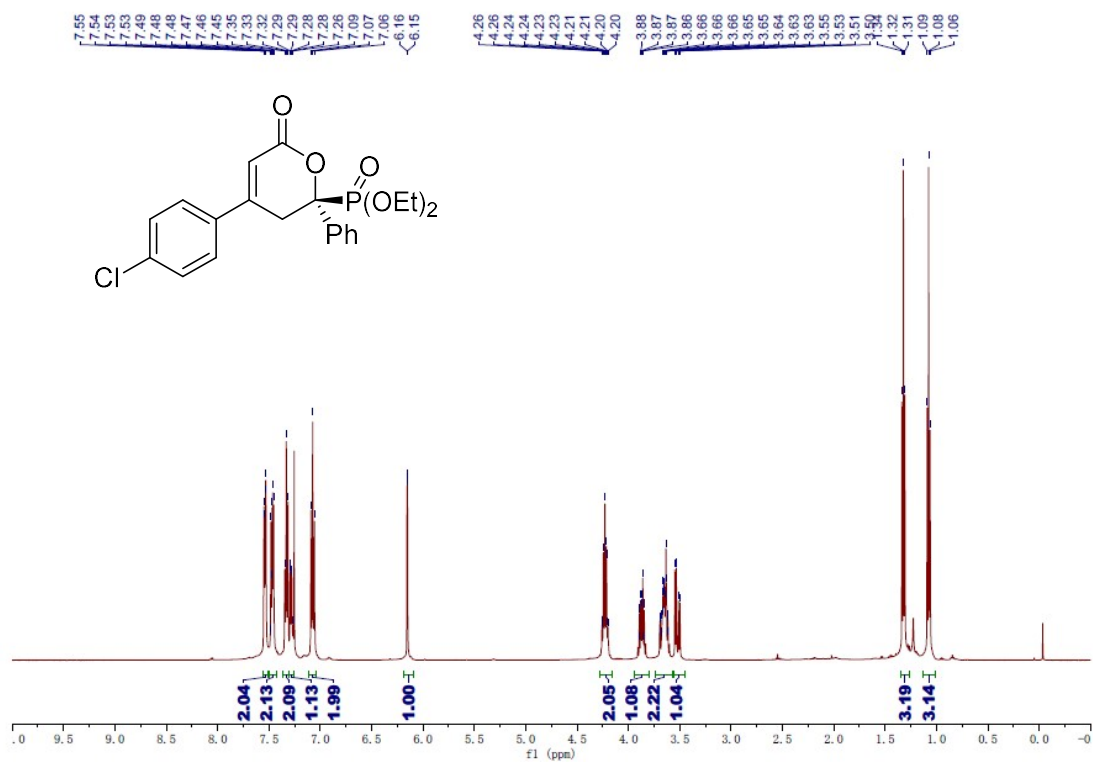

### 3h <sup>13</sup>C NMR

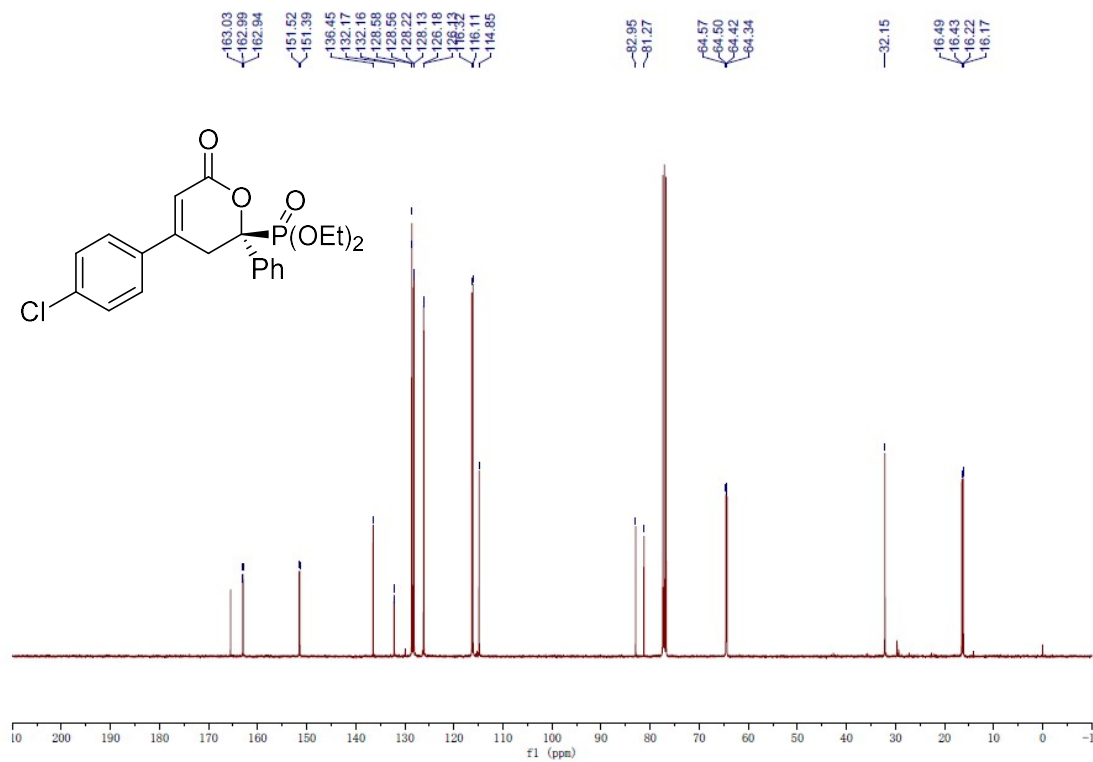



### 3h $^{31}\text{P}$ NMR

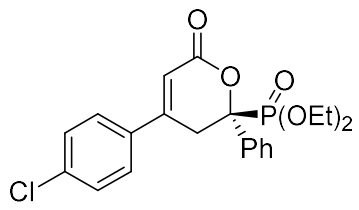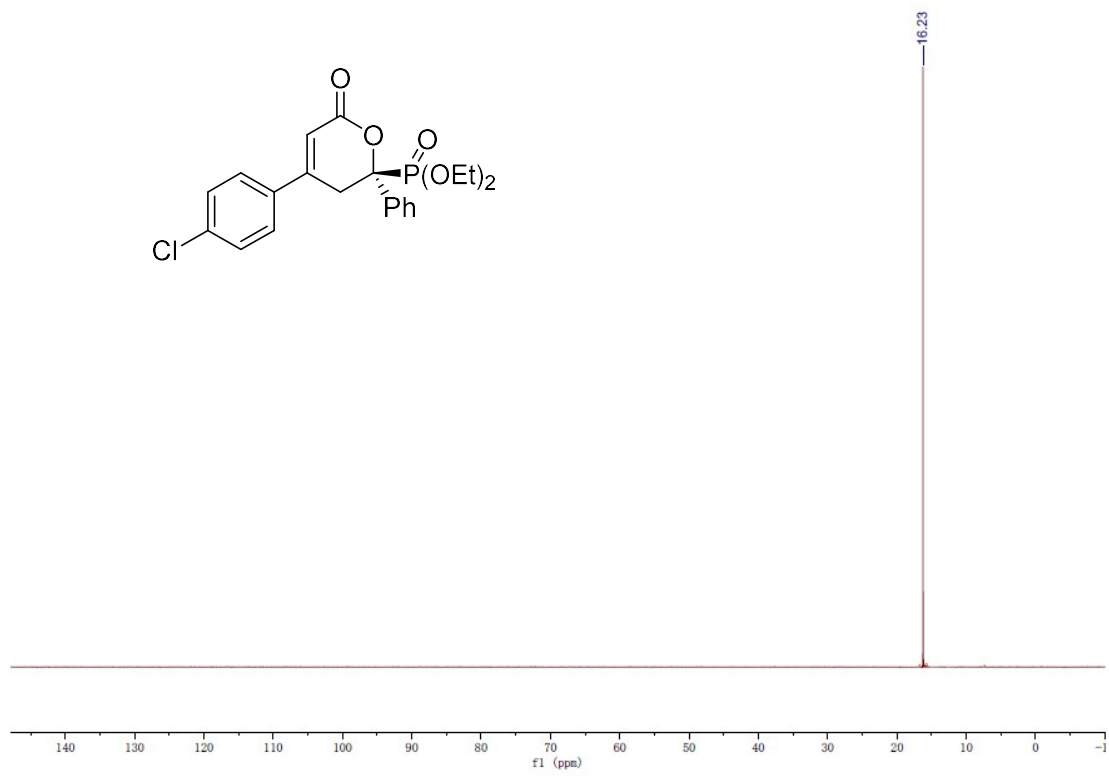

### 3i <sup>1</sup>H NMR

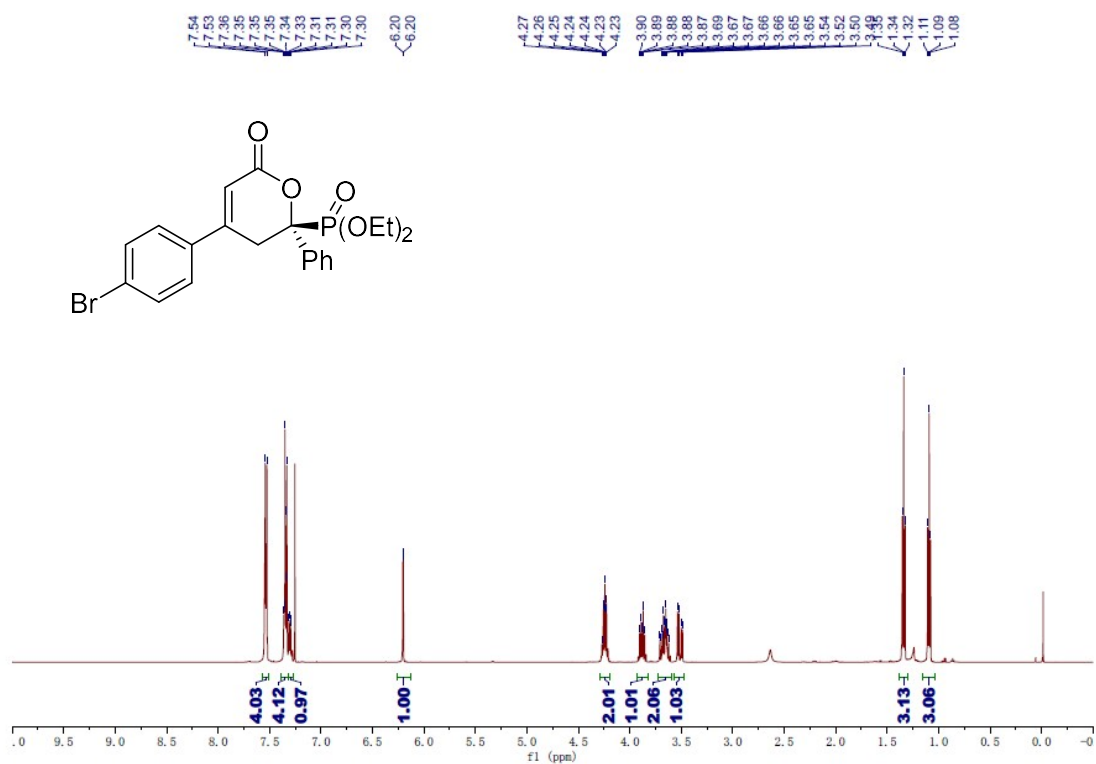

### 3i <sup>13</sup>C NMR

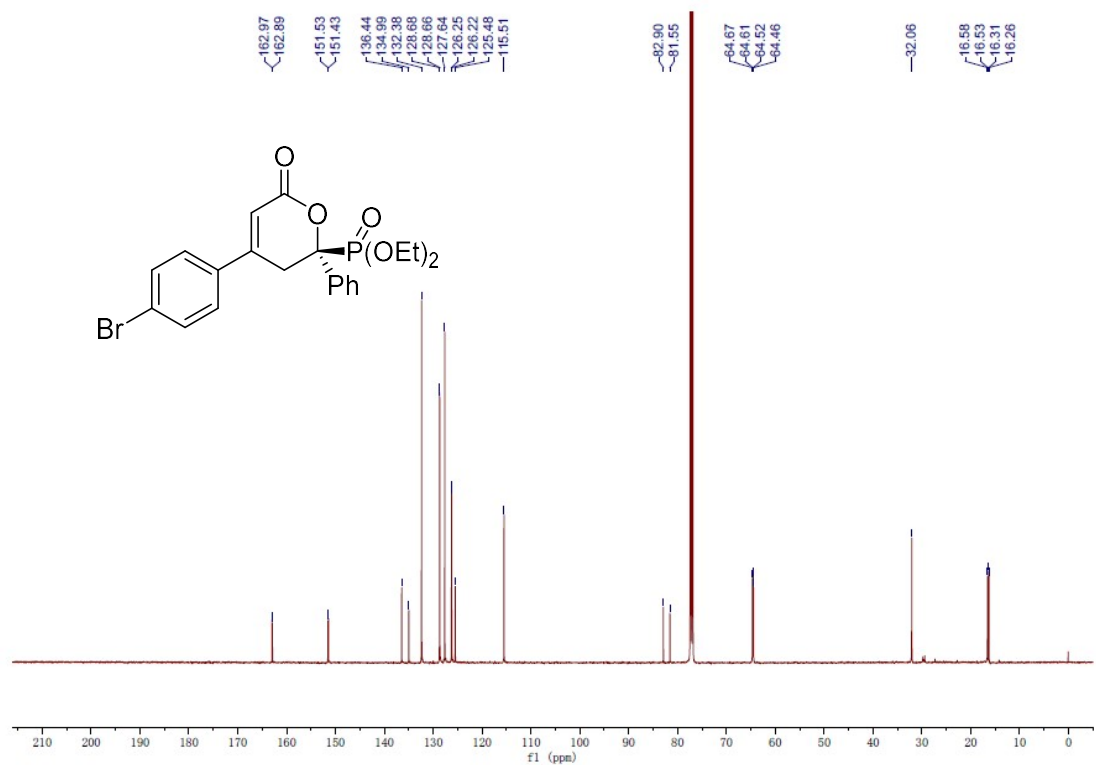

### 3i <sup>31</sup>P NMR

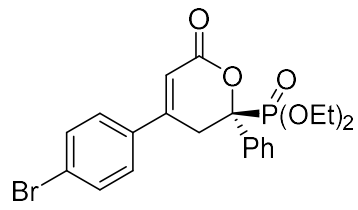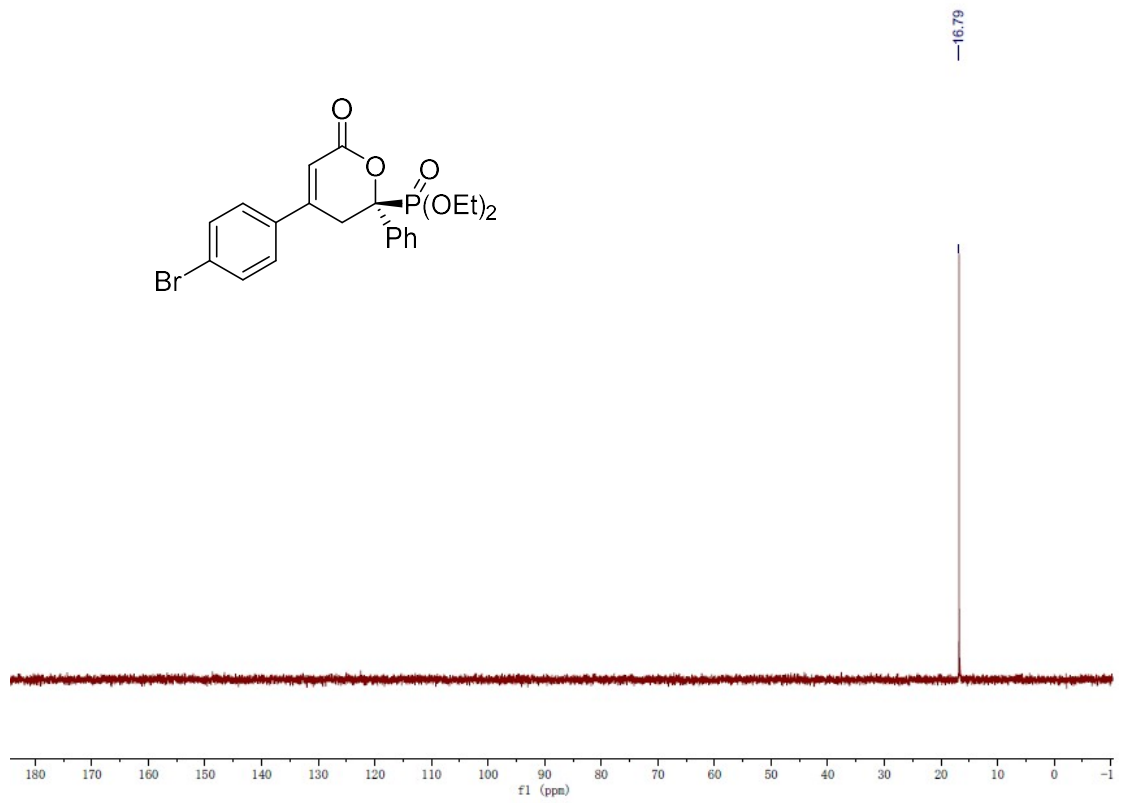

### 3j <sup>1</sup>H NMR

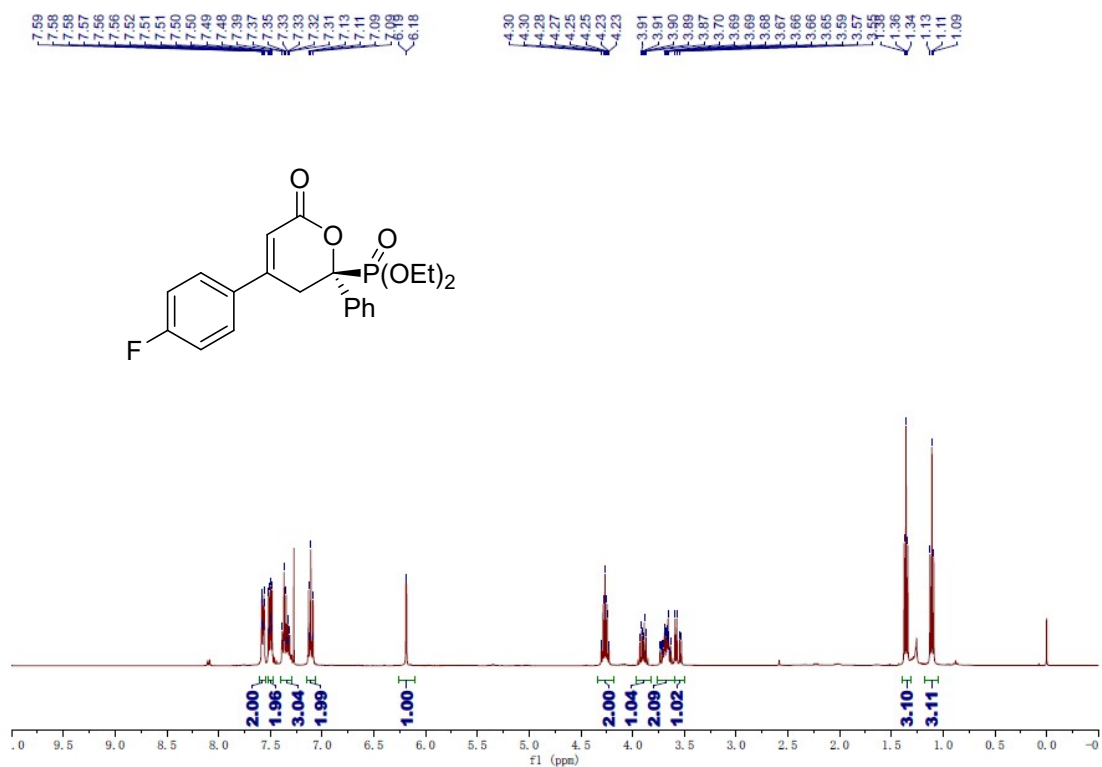

### 3j <sup>13</sup>C NMR

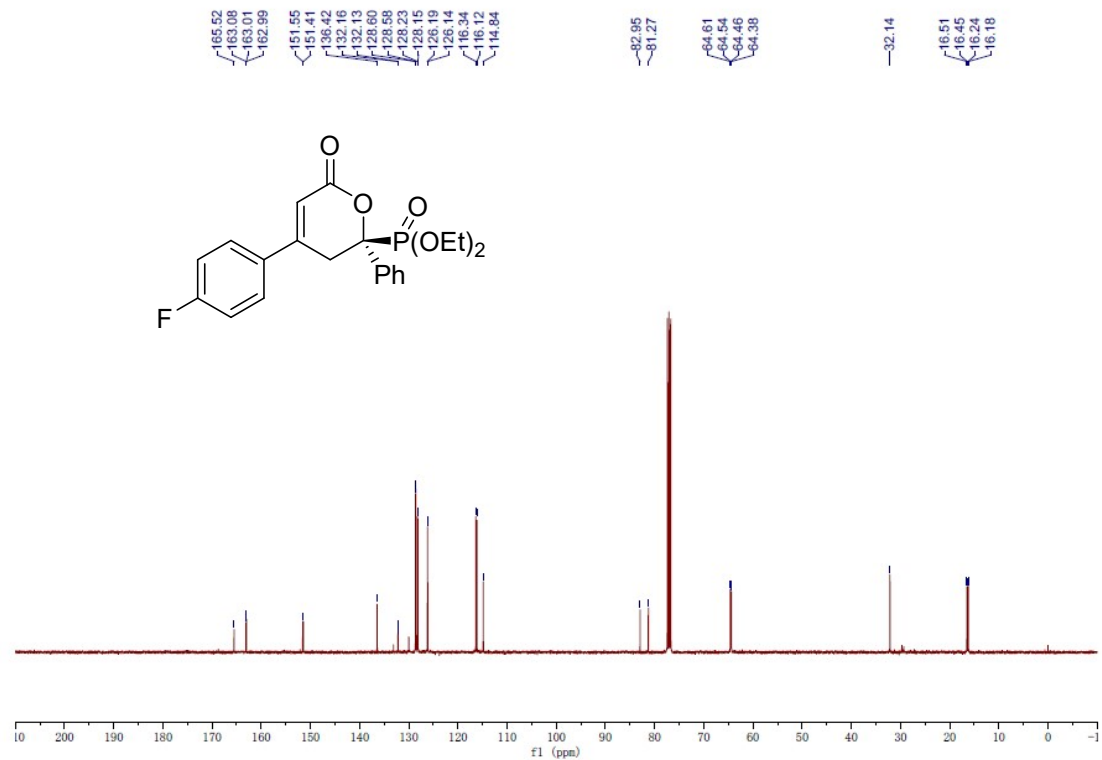

### 3j <sup>31</sup>P NMR

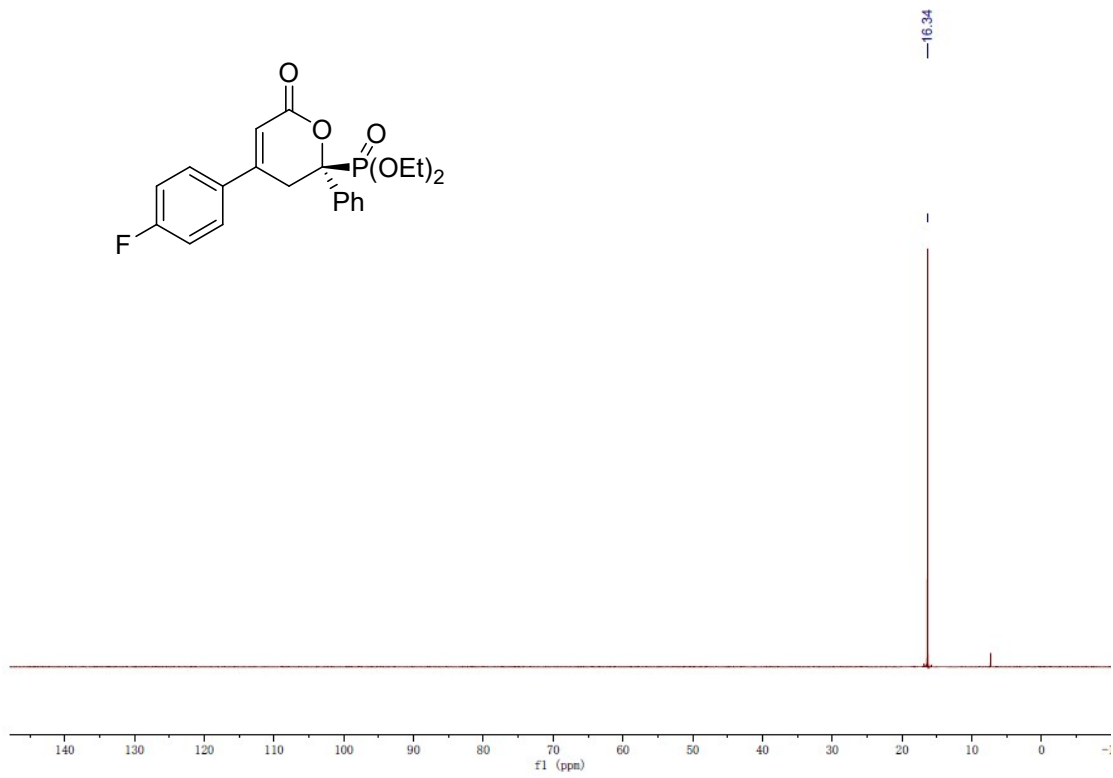

### 3j <sup>19</sup>F NMR

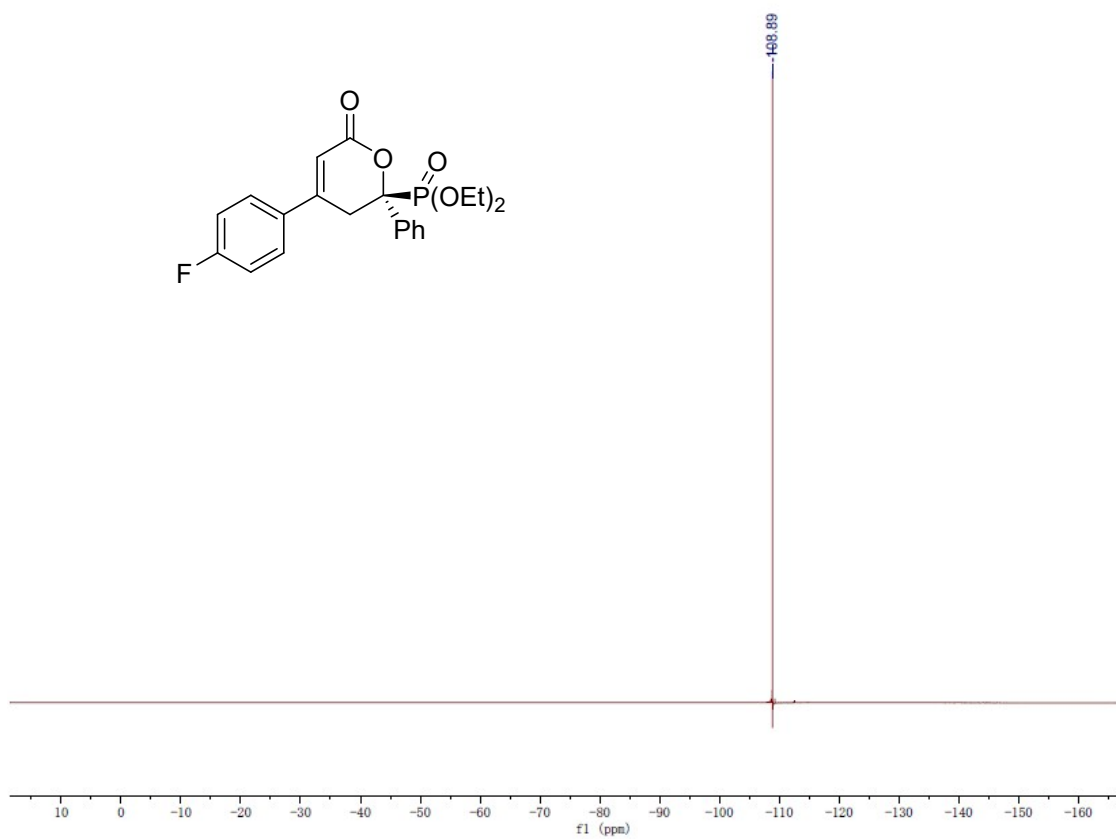

### 3k <sup>1</sup>H NMR

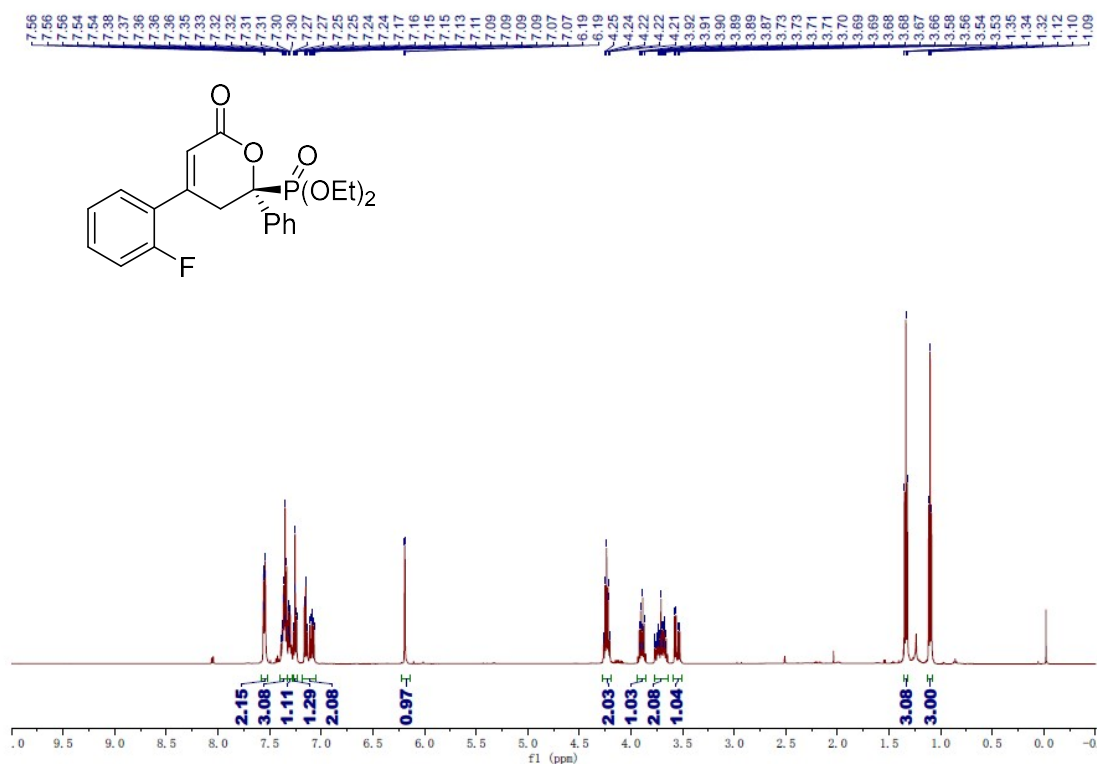

### 3k <sup>13</sup>C NMR

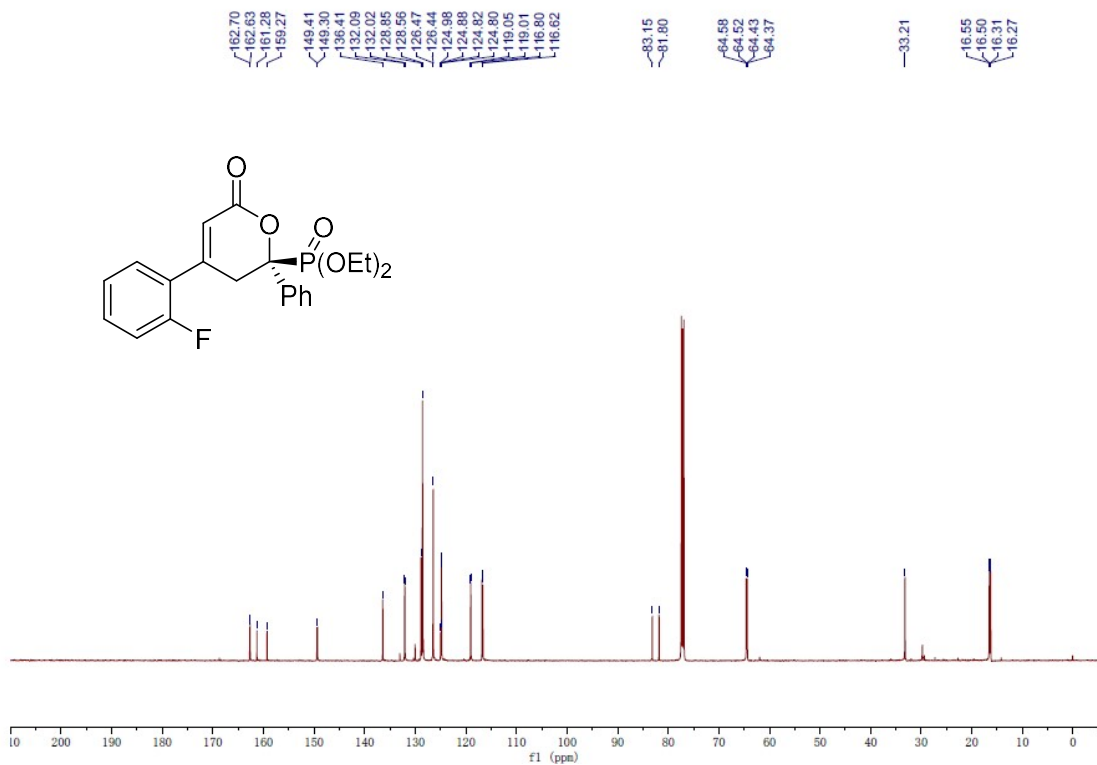

### 3k $^{31}\text{P}$ NMR

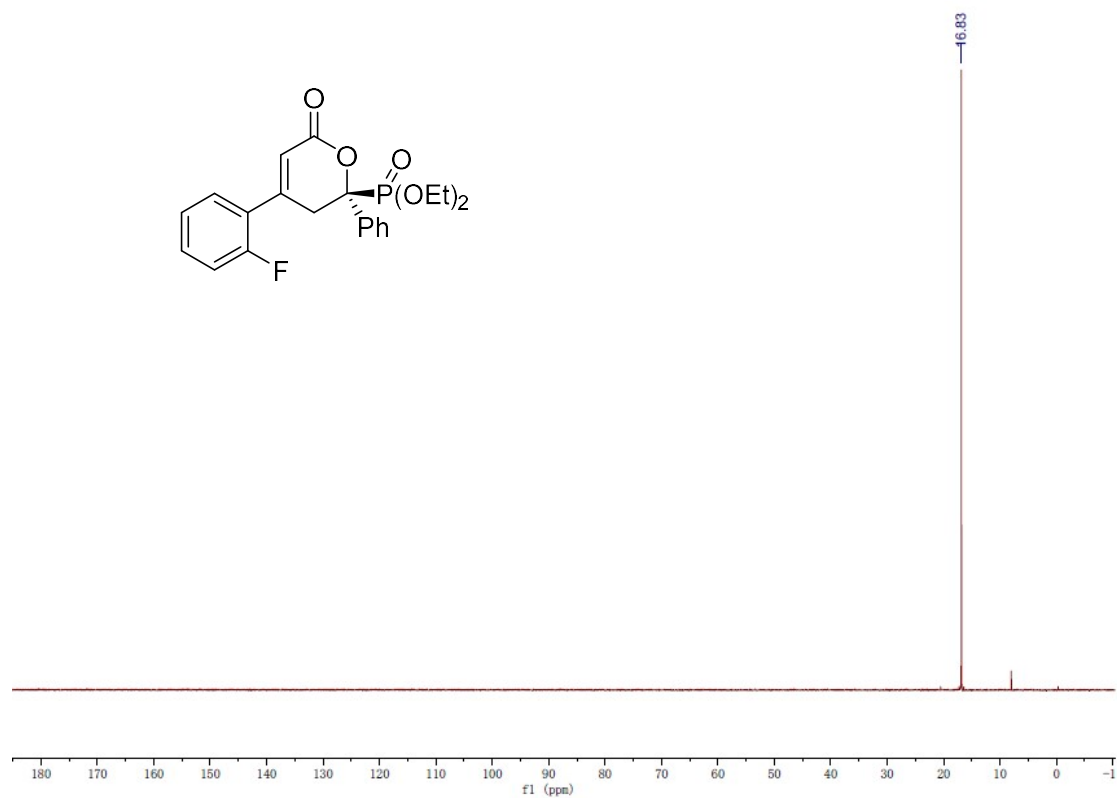

### 3k $^{19}\text{F}$ NMR

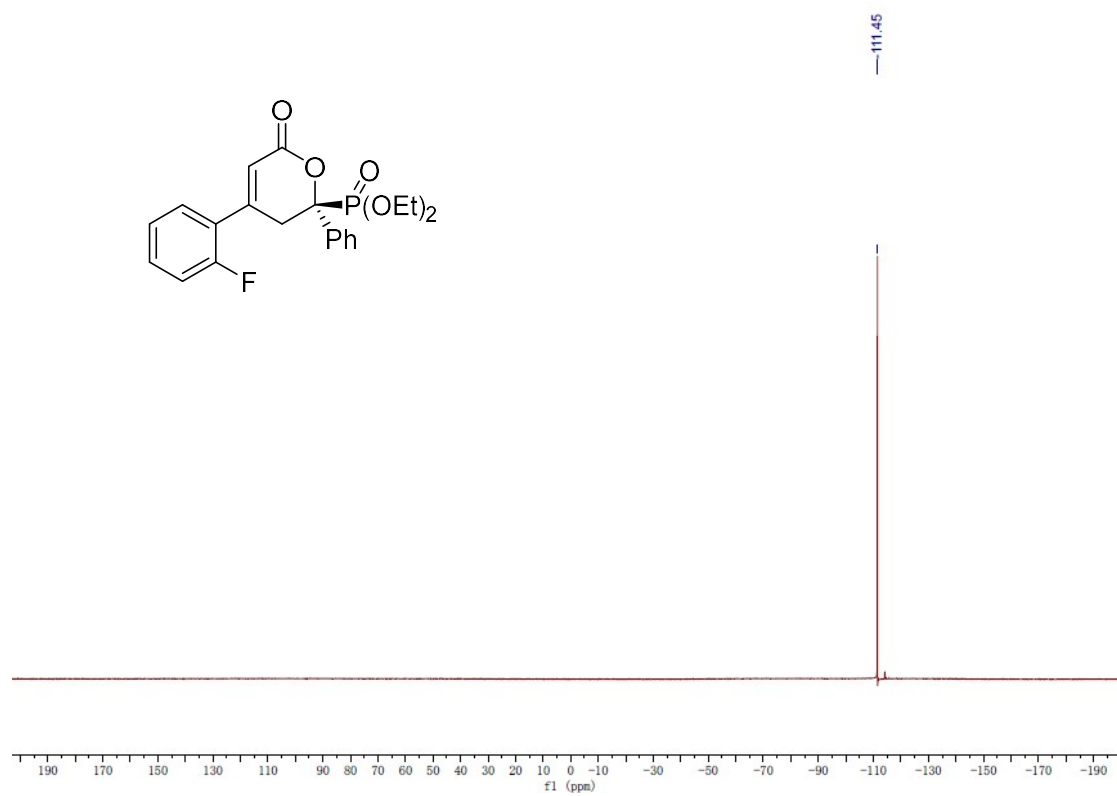

### 31 <sup>1</sup>H NMR

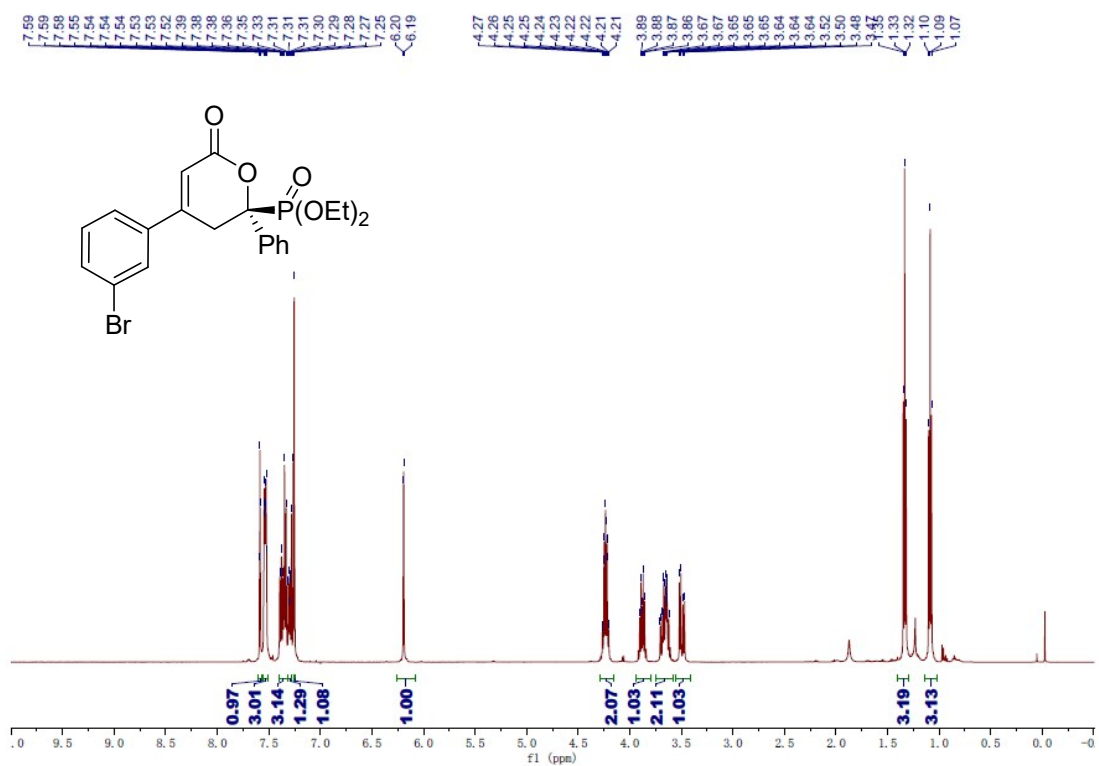

### 31 <sup>13</sup>C NMR

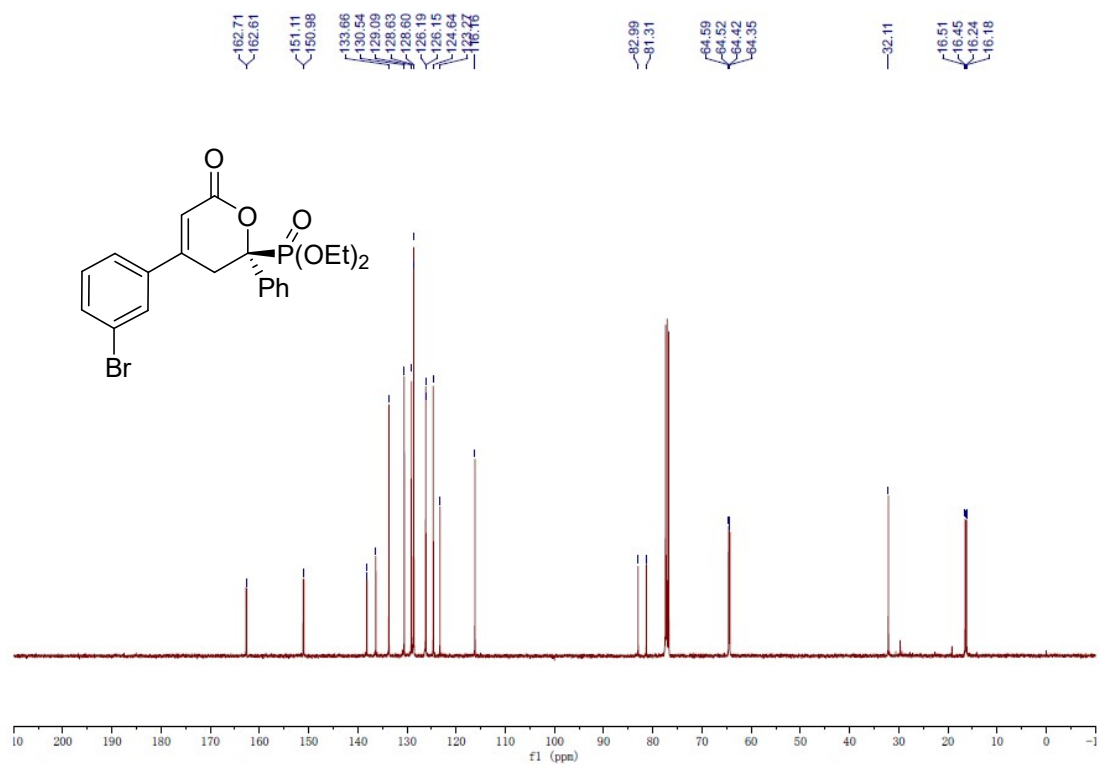



# 31P NMR

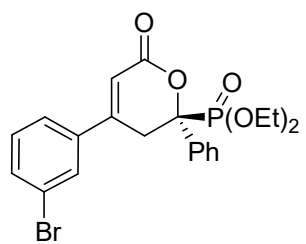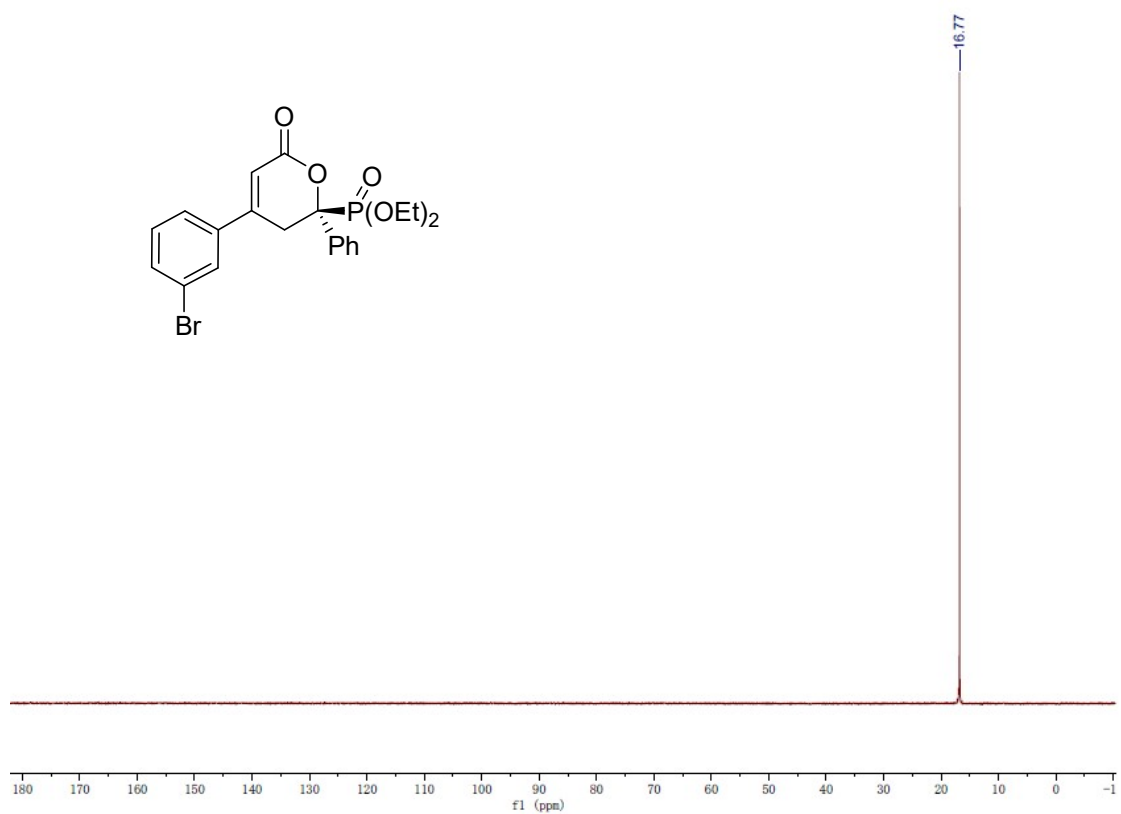

### 3m <sup>1</sup>H NMR

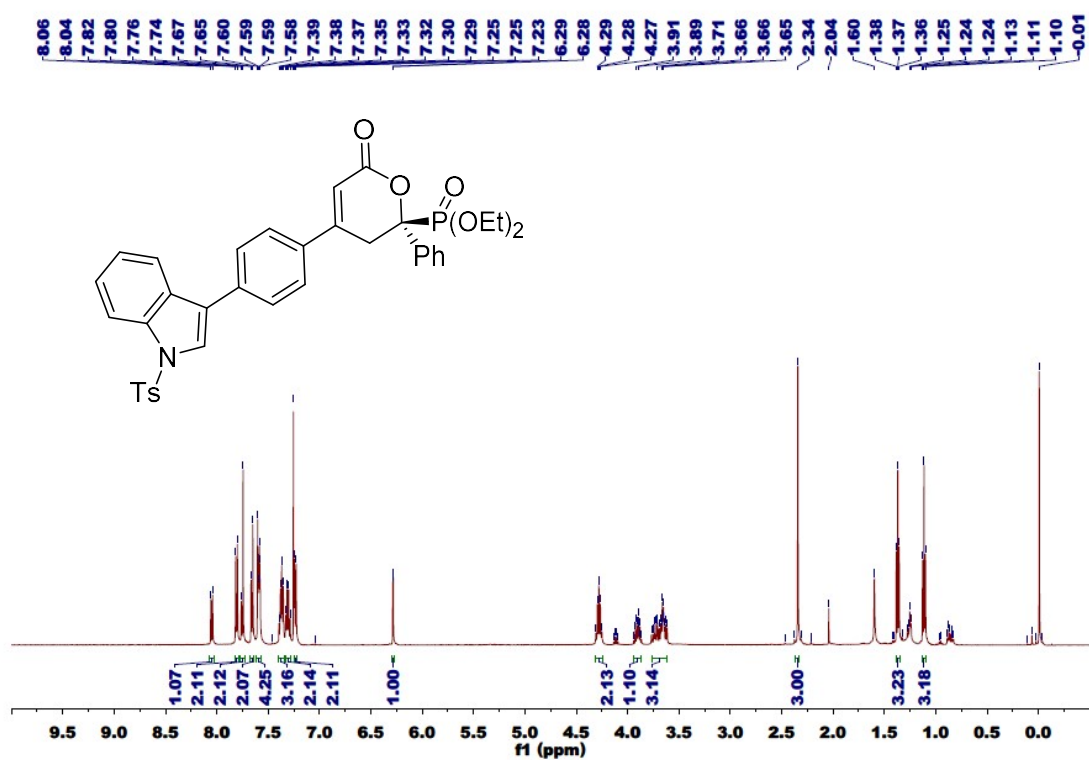

### 3m <sup>13</sup>C NMR

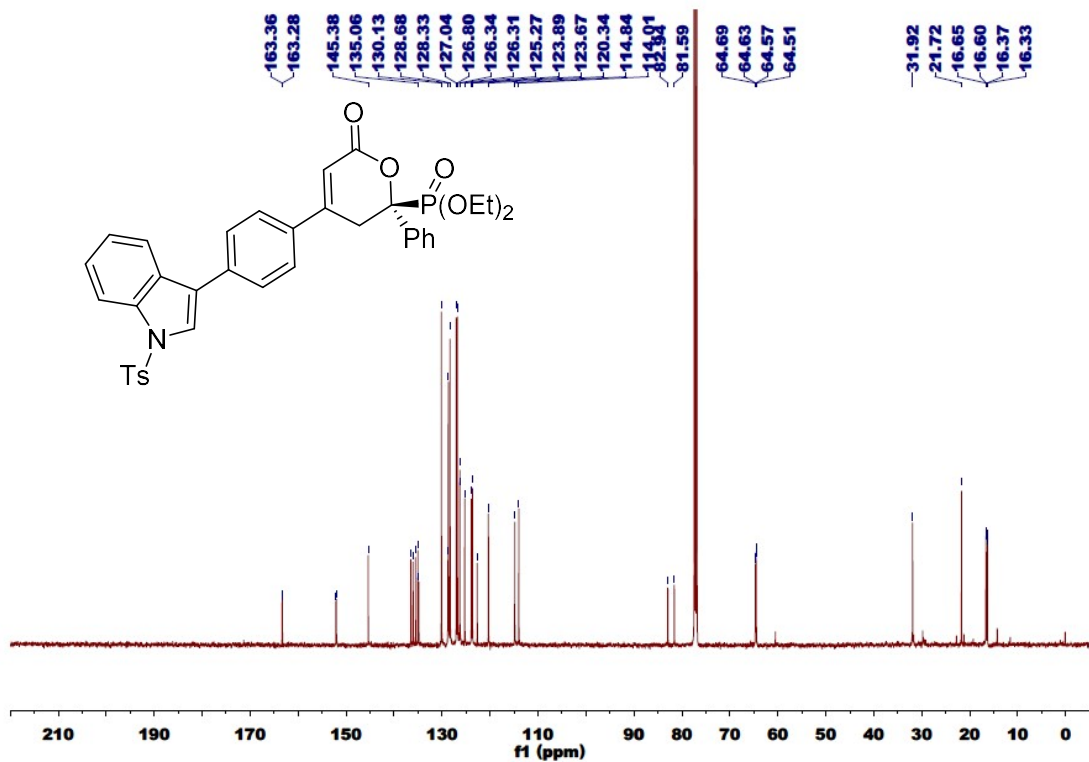

### 3m $^{31}\text{P}$ NMR

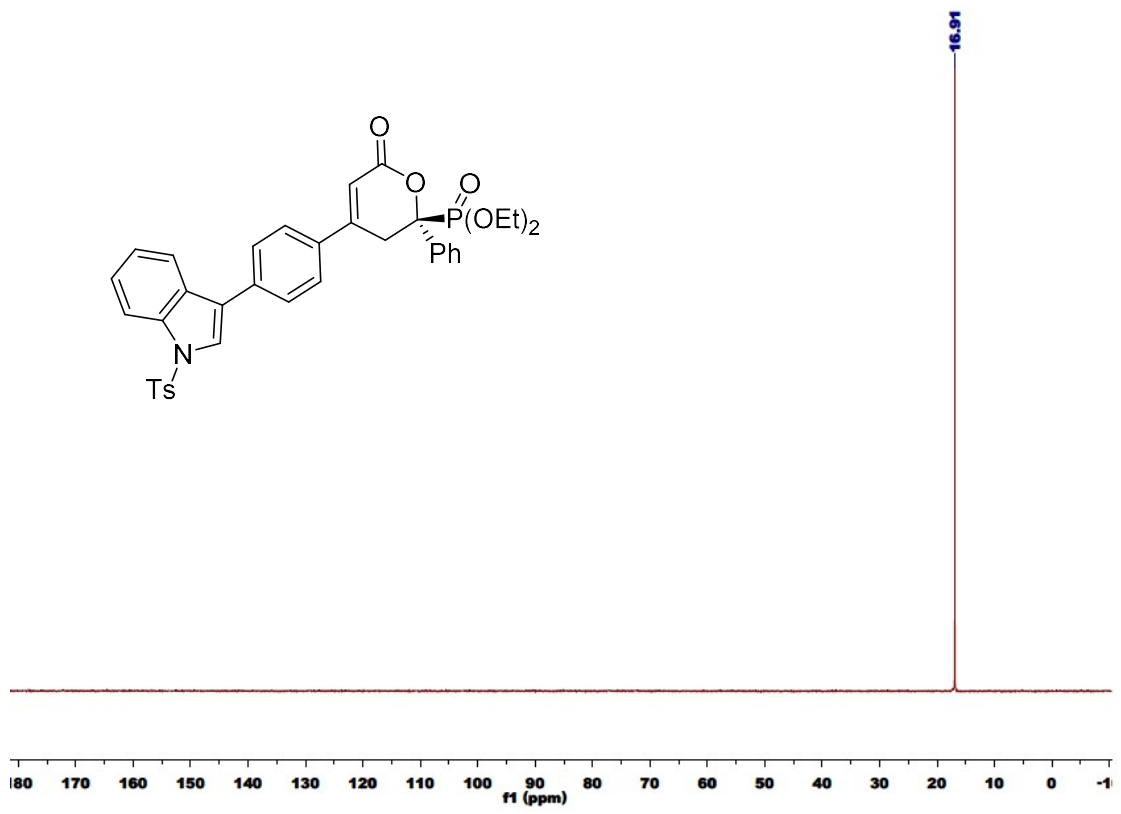

### 3n <sup>1</sup>H NMR

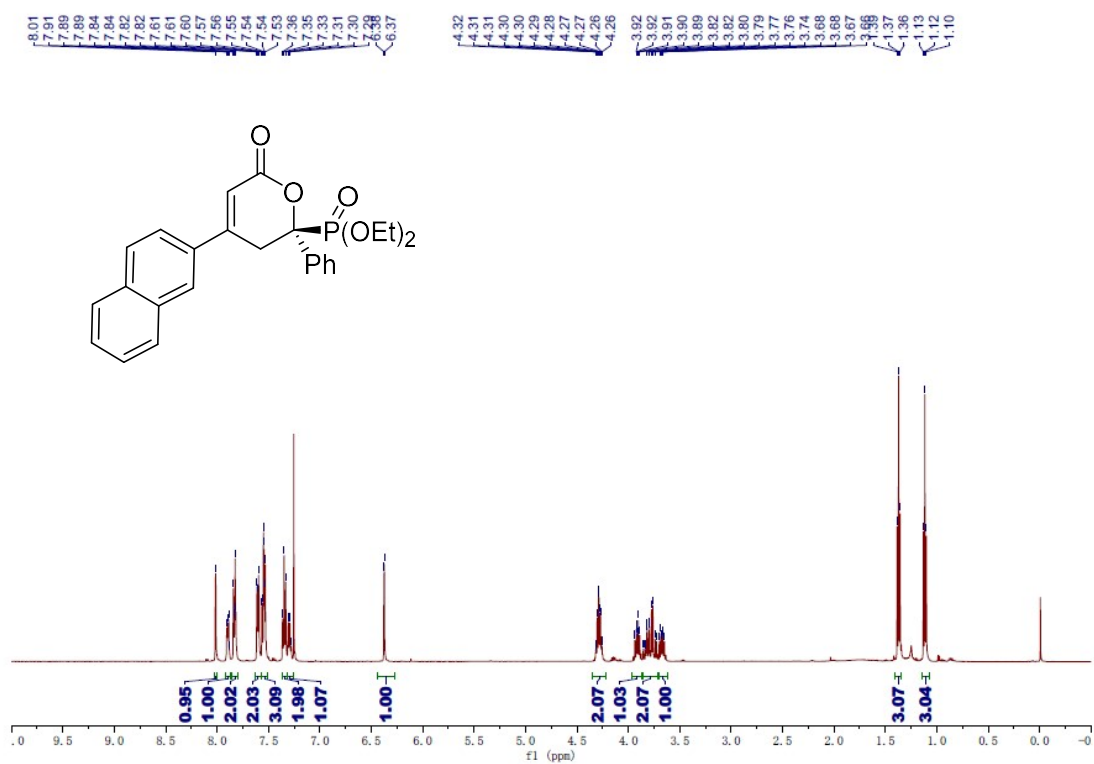

### 3n <sup>13</sup>C NMR

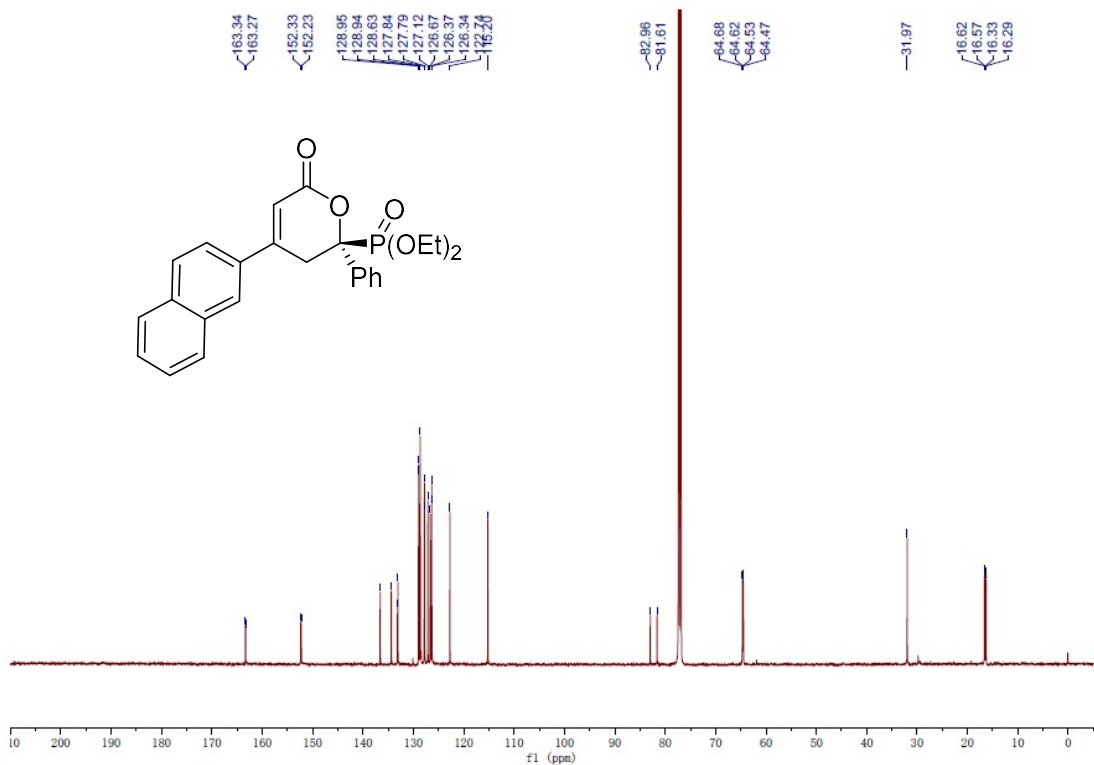

### 3n $^{31}\text{P}$ NMR

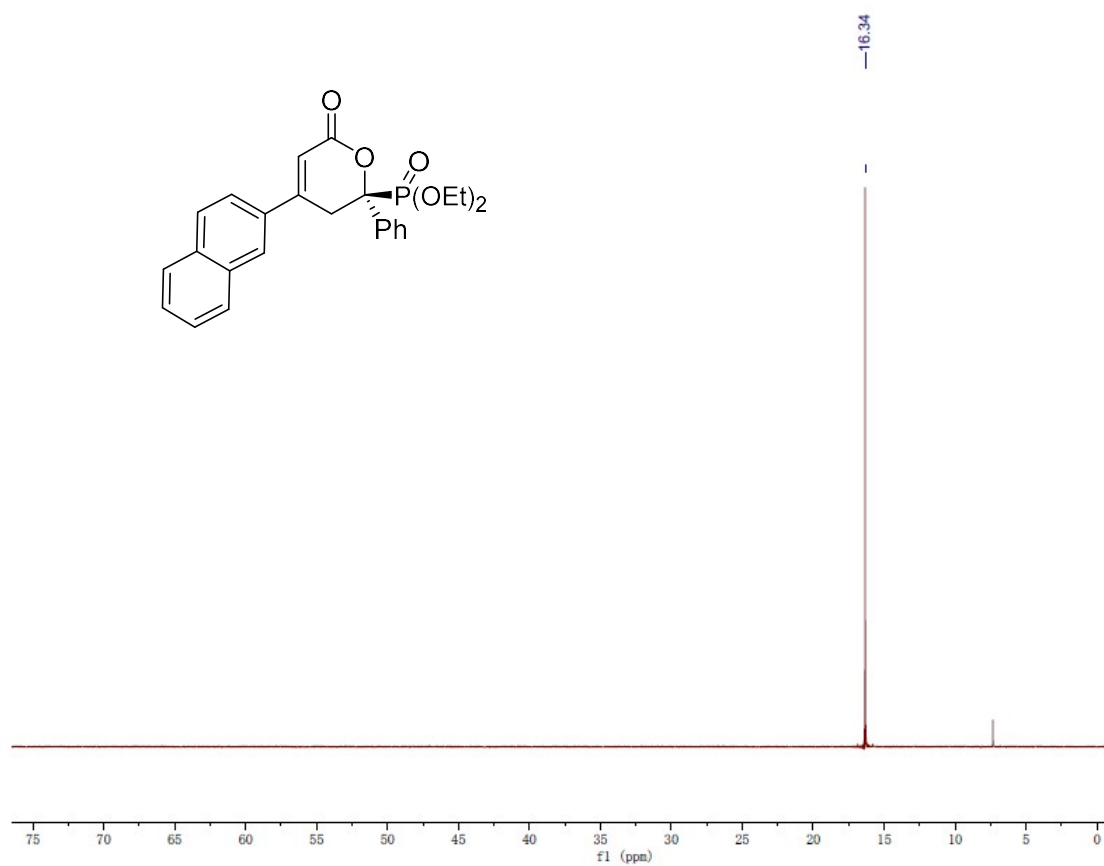

### 3o <sup>1</sup>H NMR

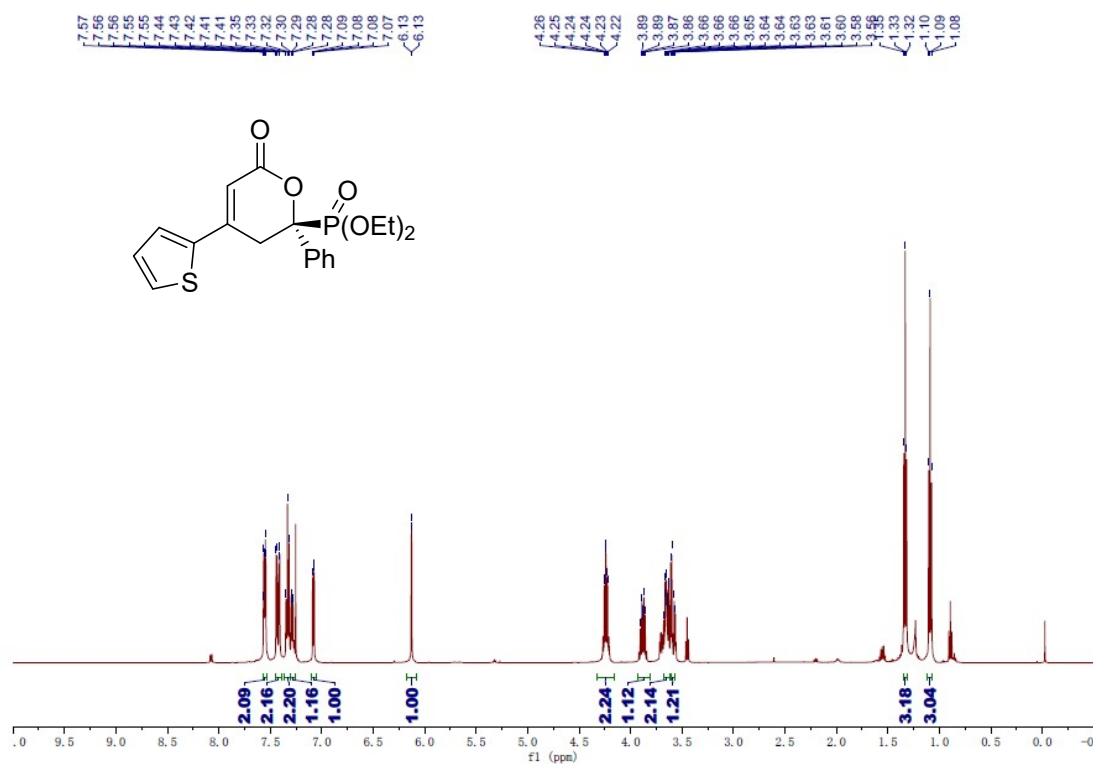

### 3o <sup>13</sup>C NMR

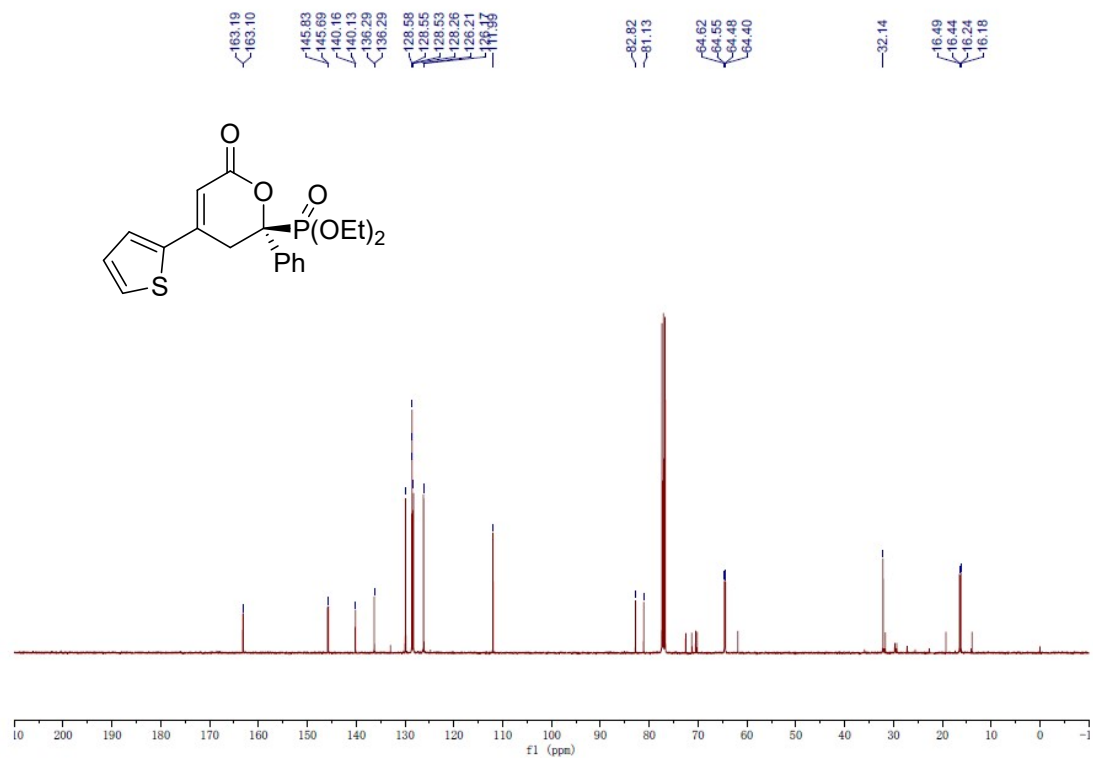

# 3o $^{31}\text{P}$ NMR

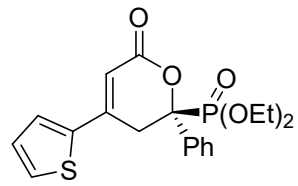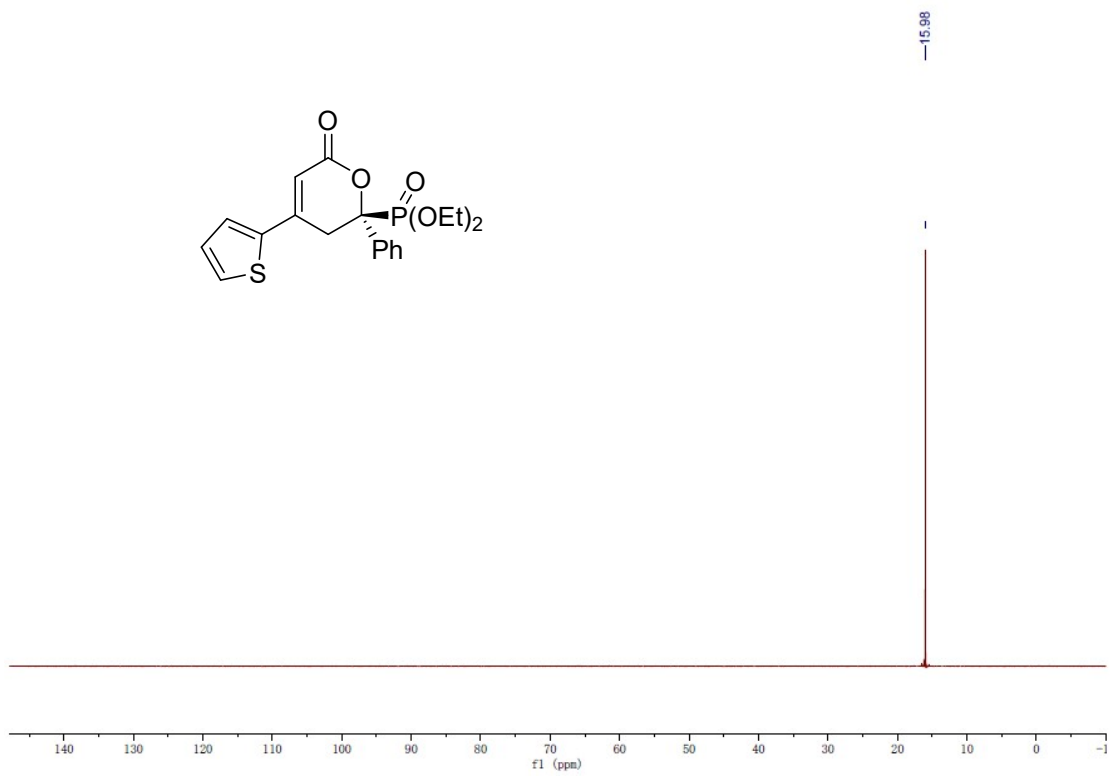

### 3p <sup>1</sup>H NMR

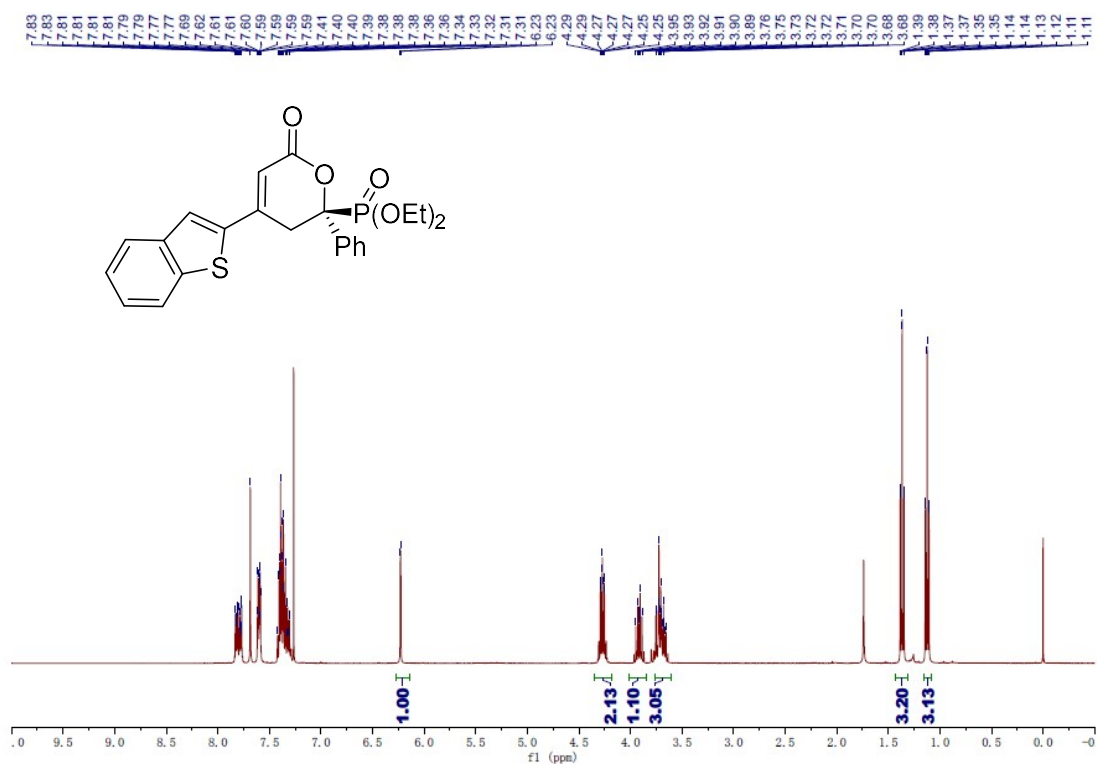

### 3p <sup>13</sup>C NMR

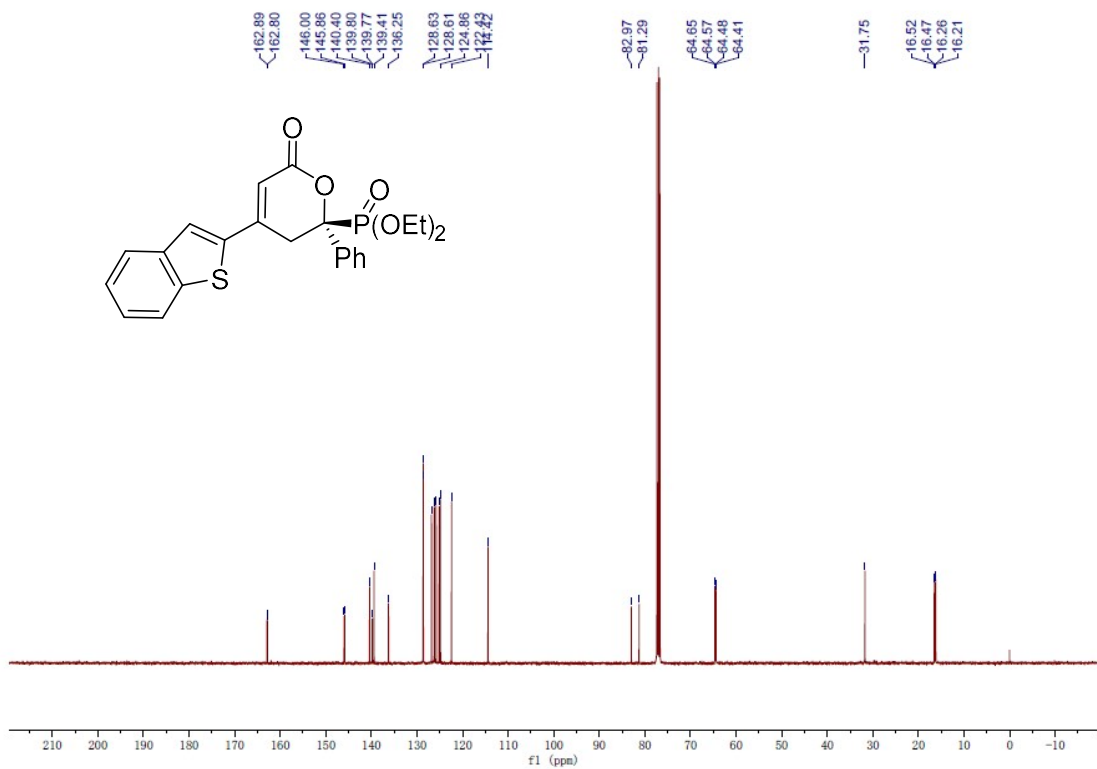



### 3p $^{31}\text{P}$ NMR

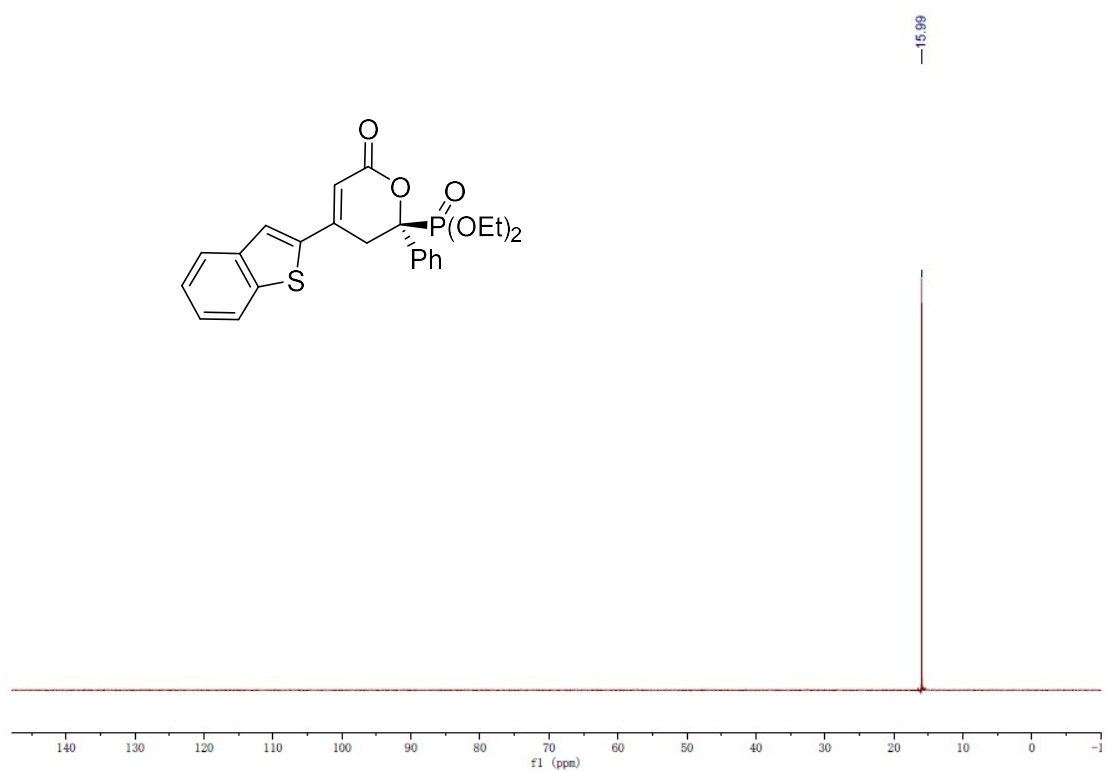

### 3q $^1\text{H}$ NMR

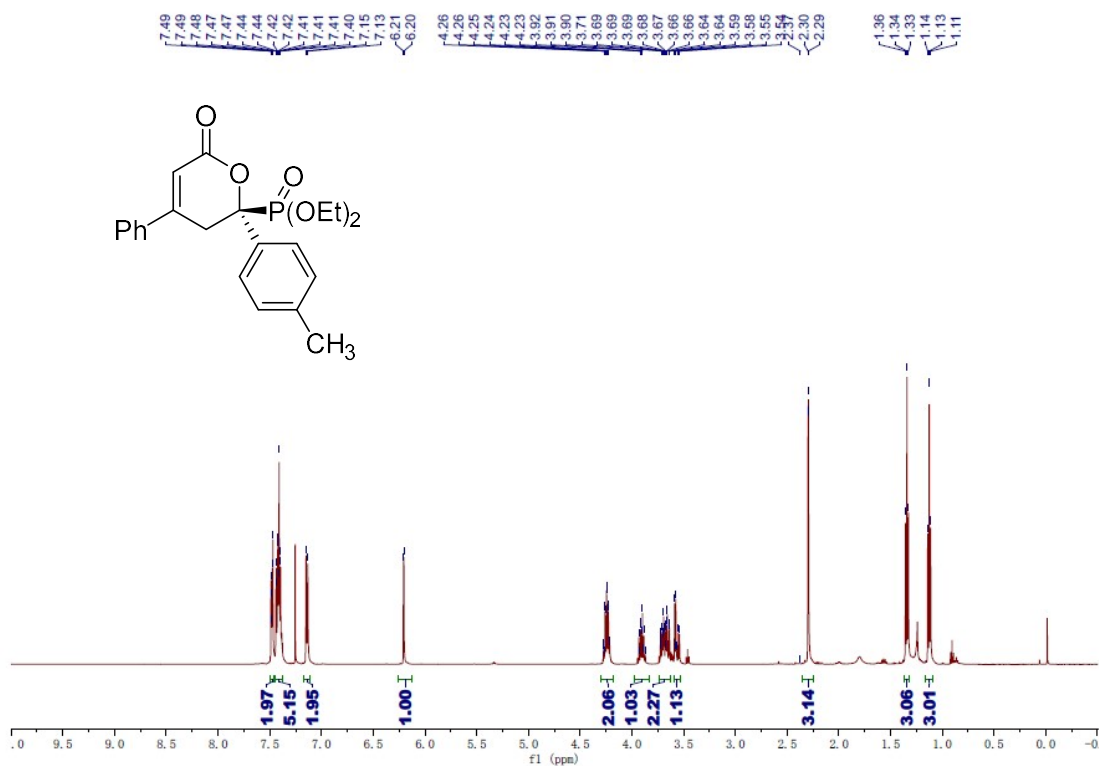

### 3q $^{13}\text{C}$ NMR

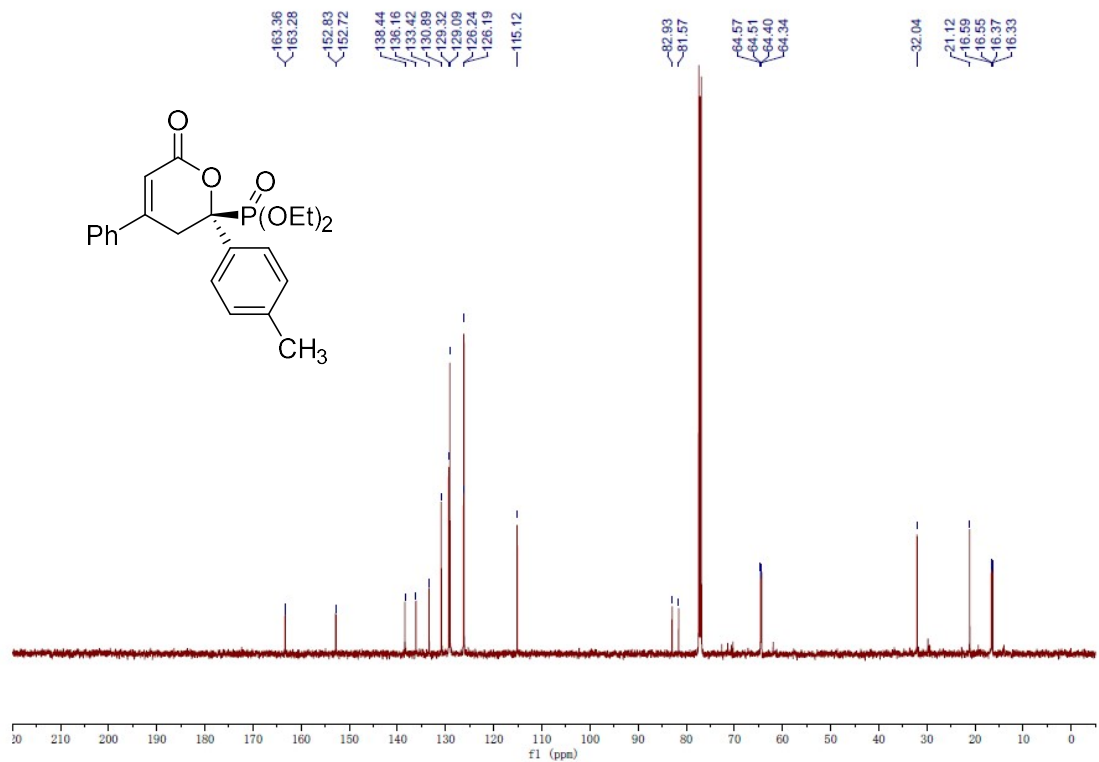

### 3q $^{31}\text{P}$ NMR

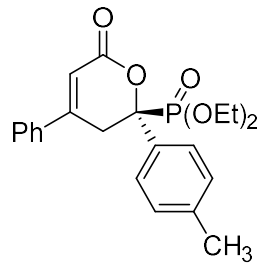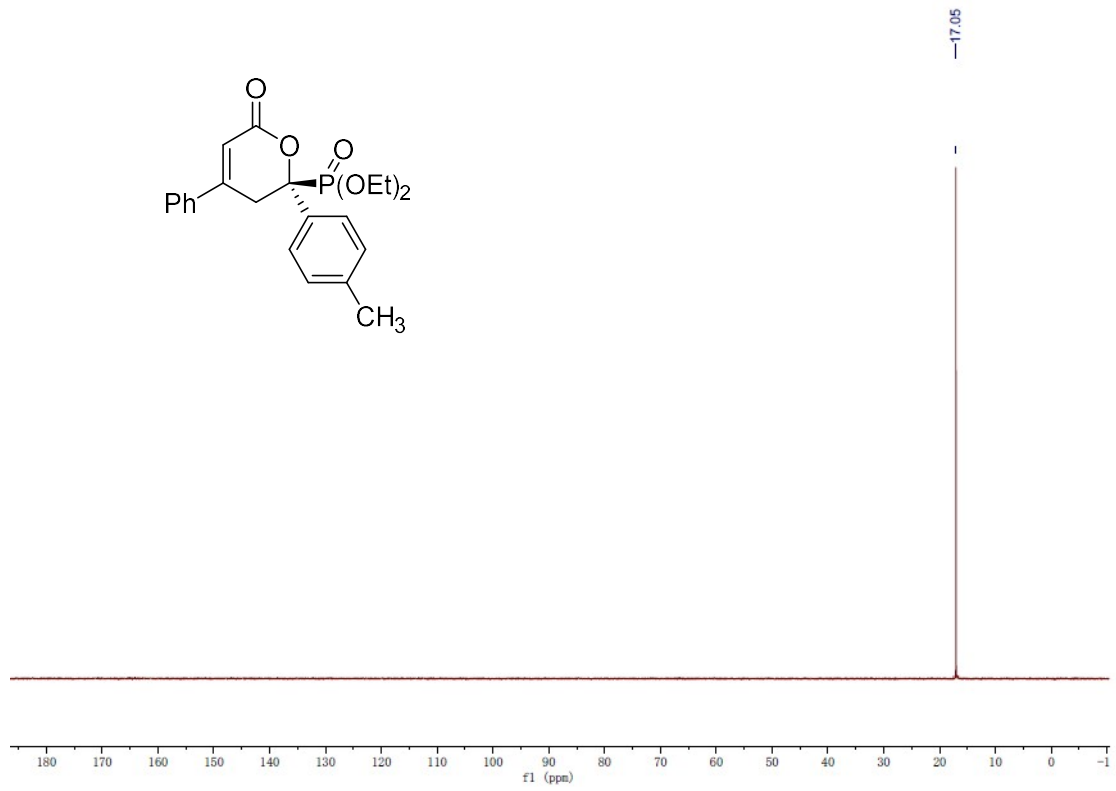

### 3r <sup>1</sup>H NMR

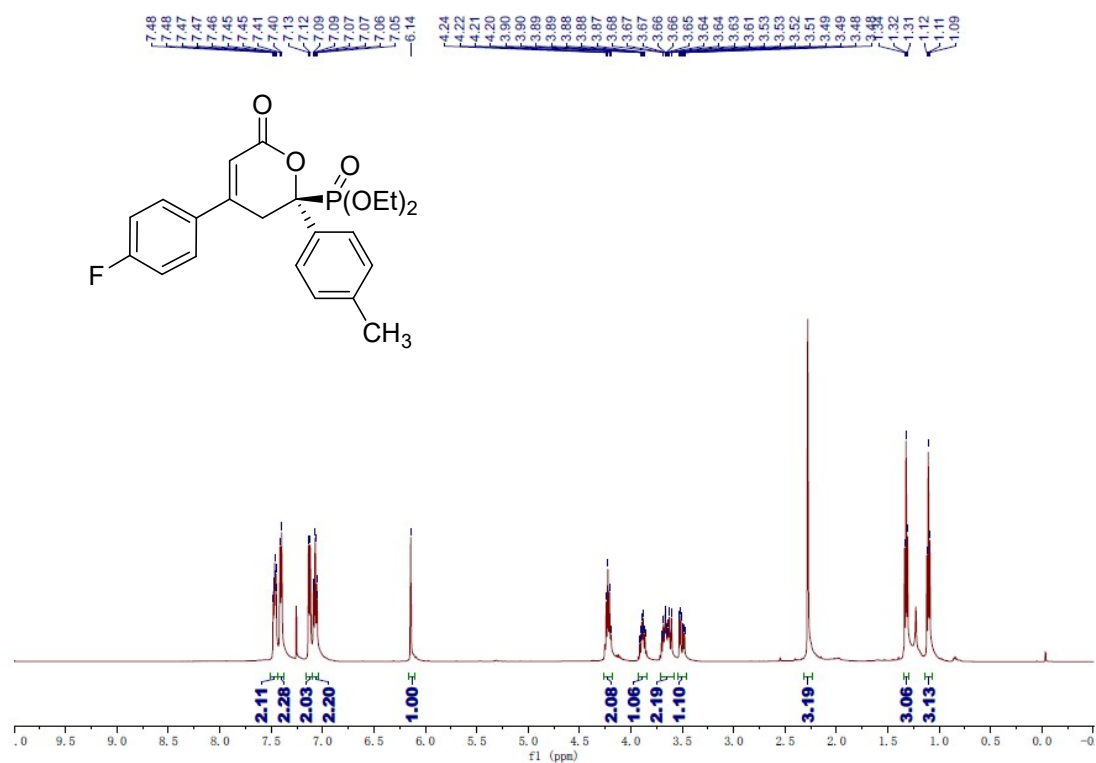

### 3r <sup>13</sup>C NMR

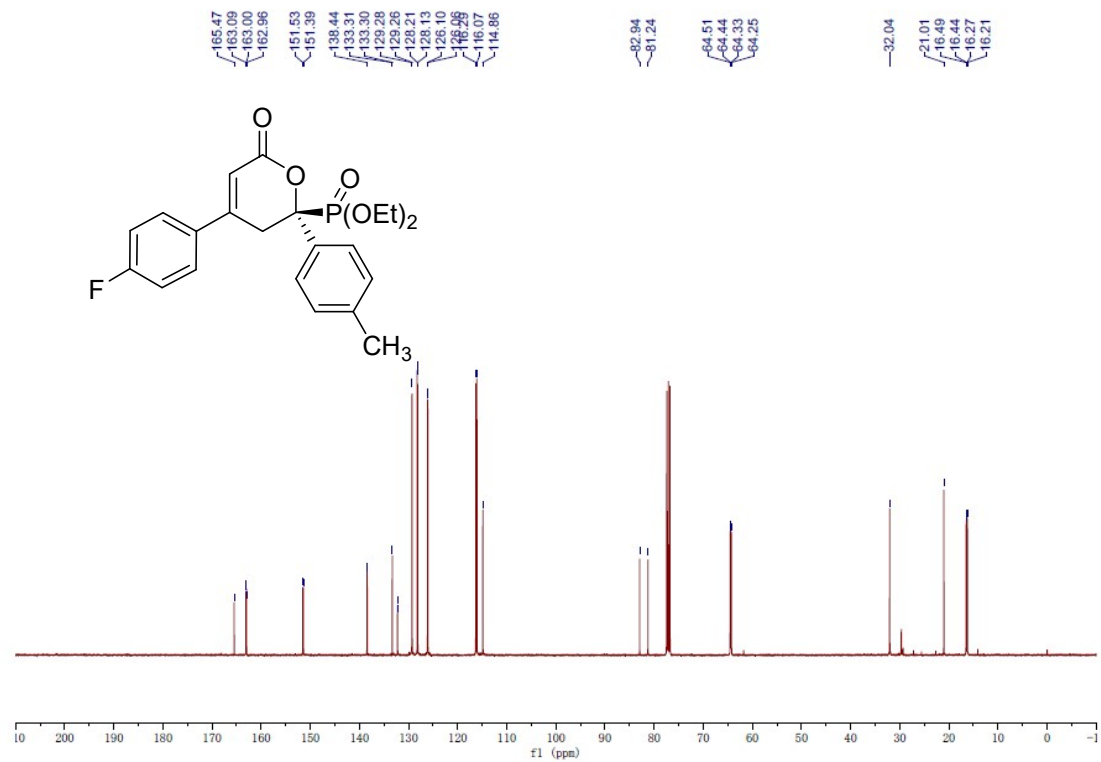

### 3r <sup>31</sup>P NMR

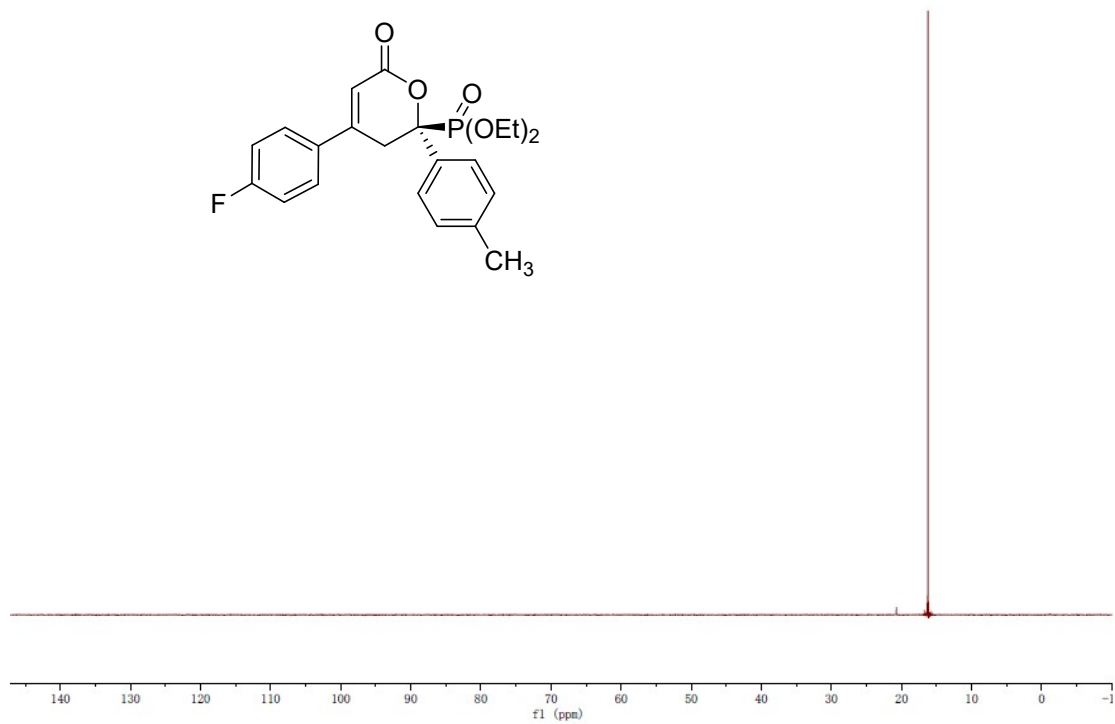

### 3r <sup>19</sup>F NMR

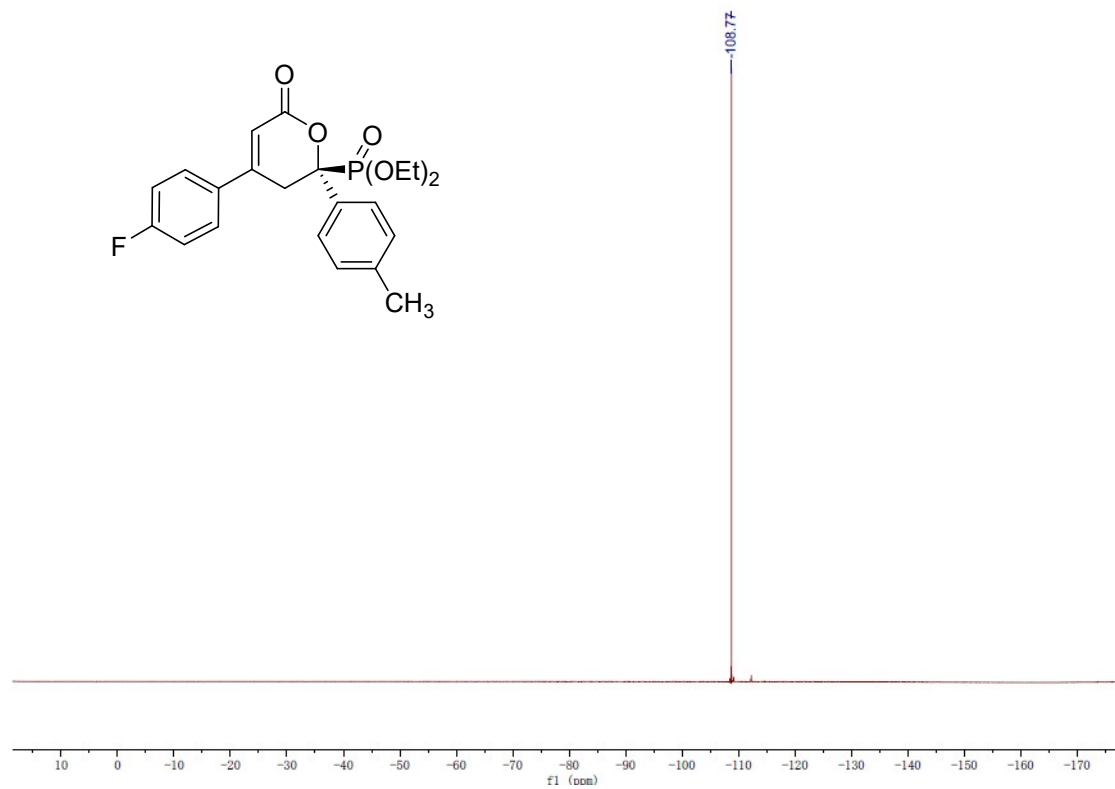

### 3s <sup>1</sup>H NMR

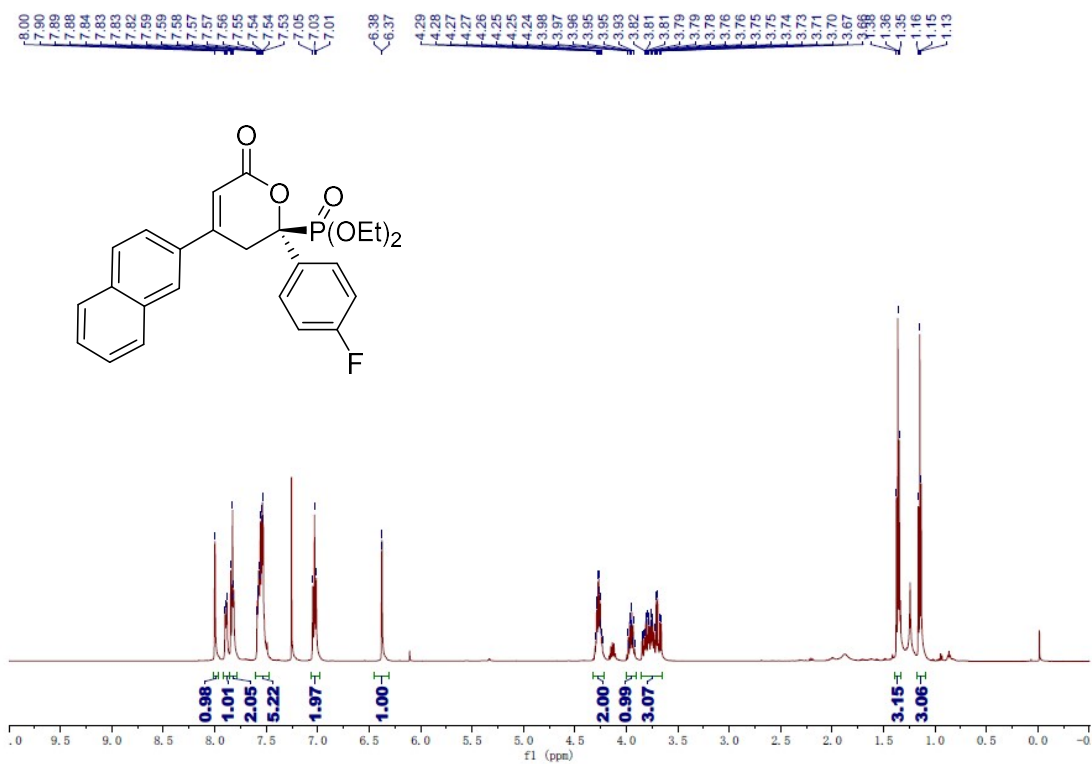

### 3s <sup>13</sup>C NMR

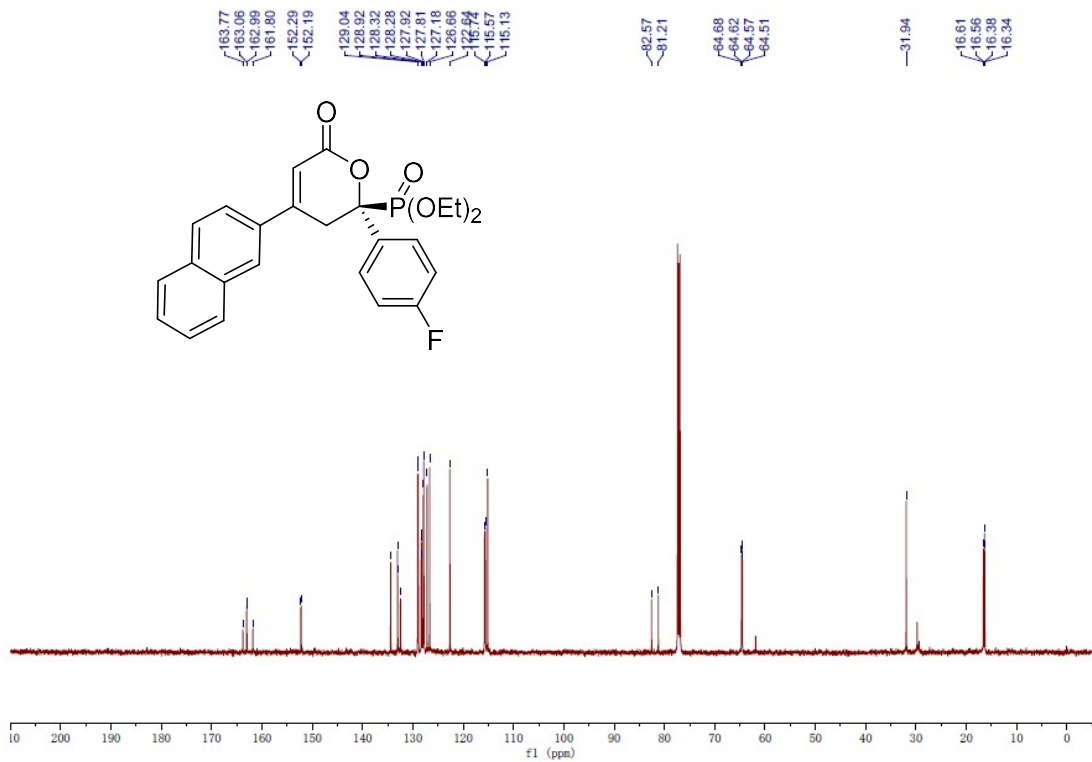

### 3s $^{31}\text{P}$ NMR

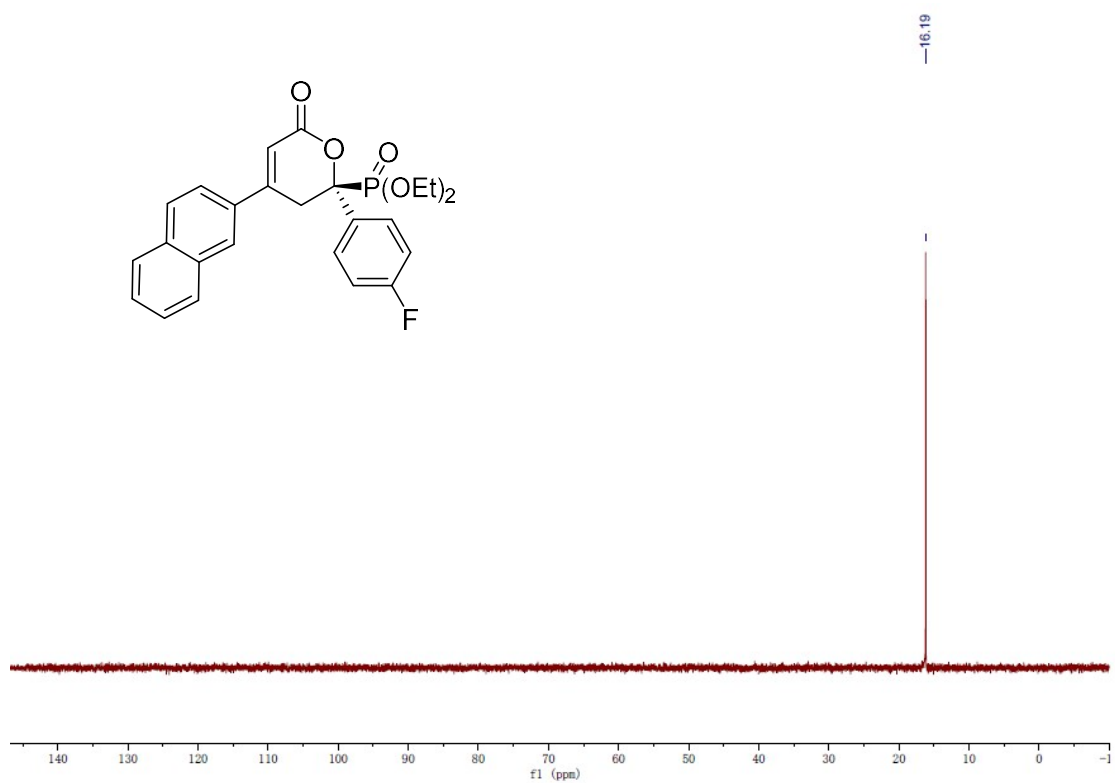

### 3s $^{19}\text{F}$ NMR

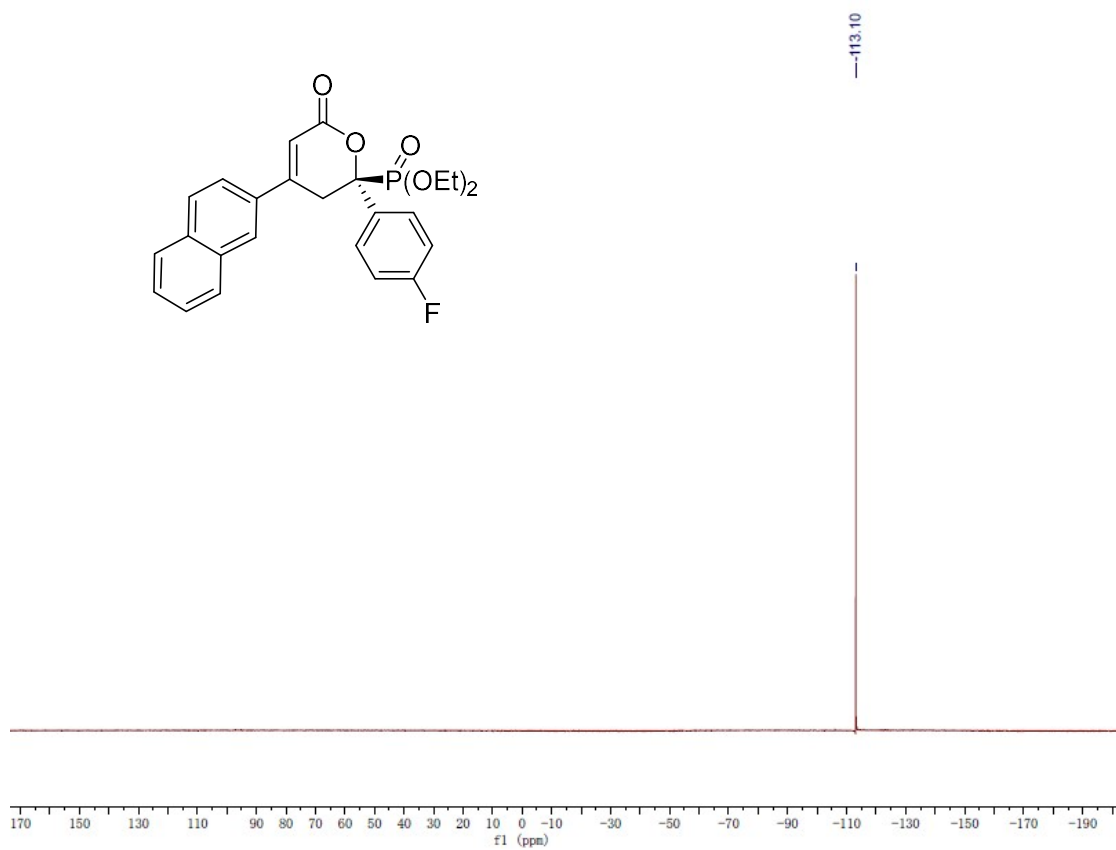

### 3t <sup>1</sup>H NMR

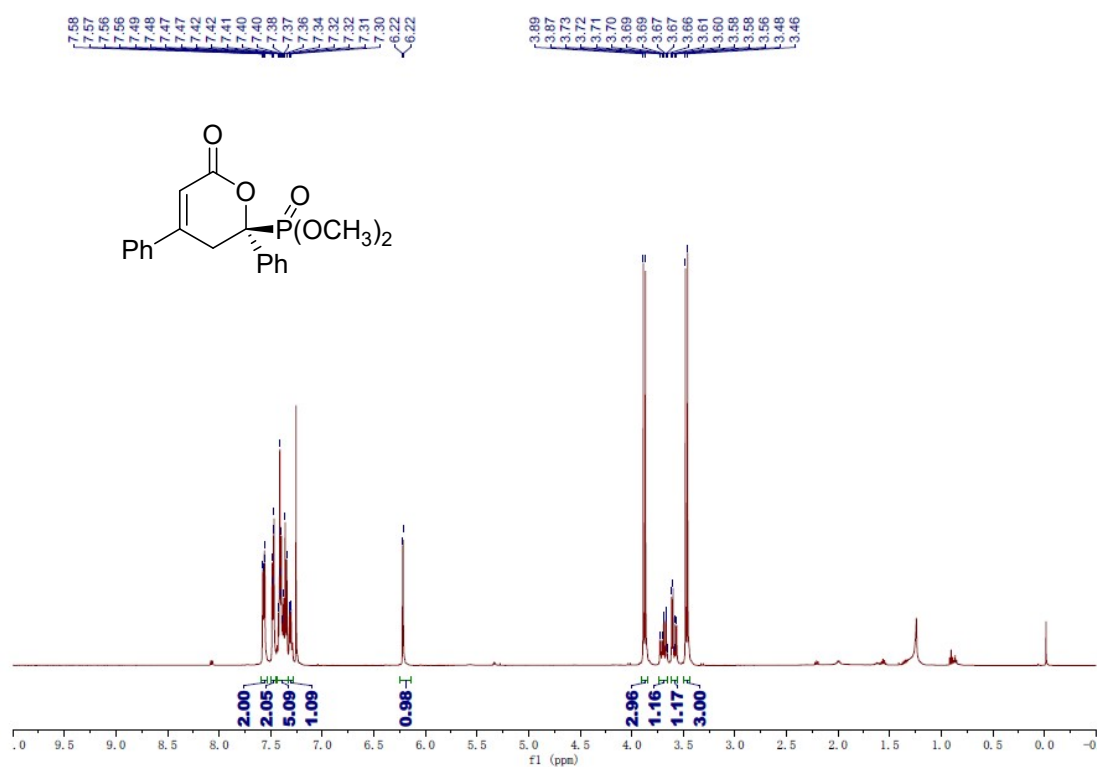

### 3t <sup>13</sup>C NMR

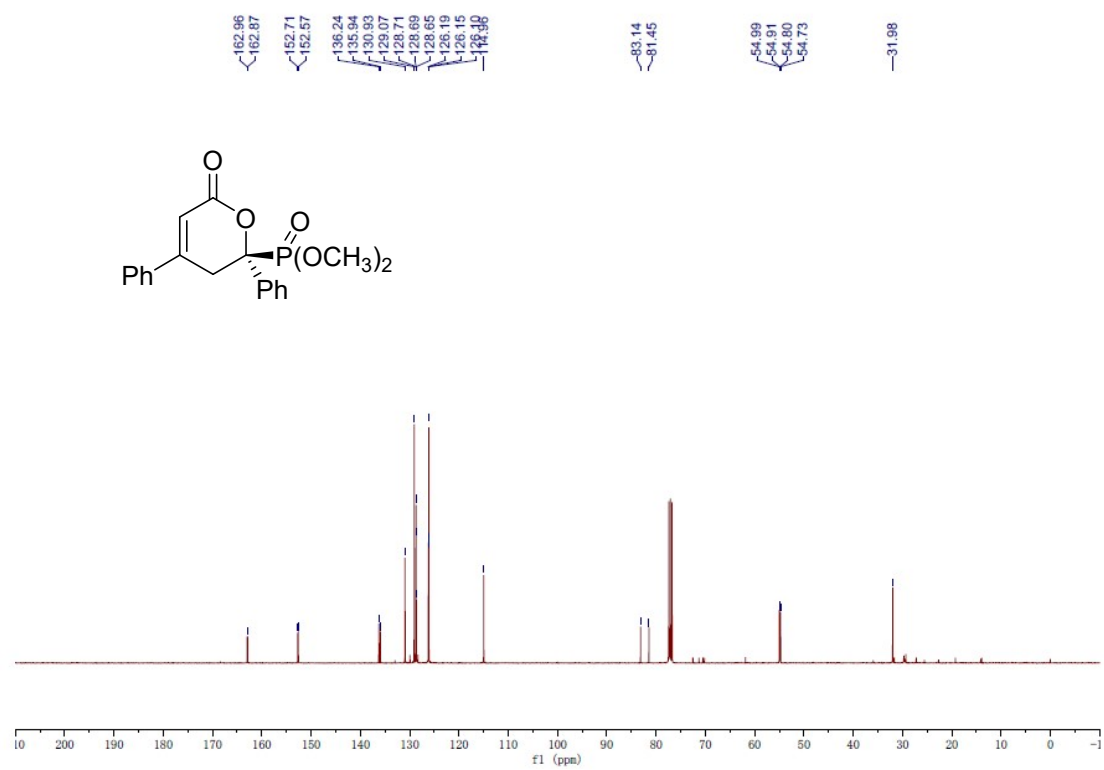



### 3t <sup>31</sup>P NMR

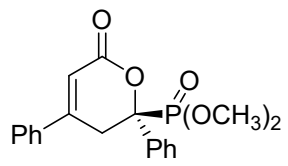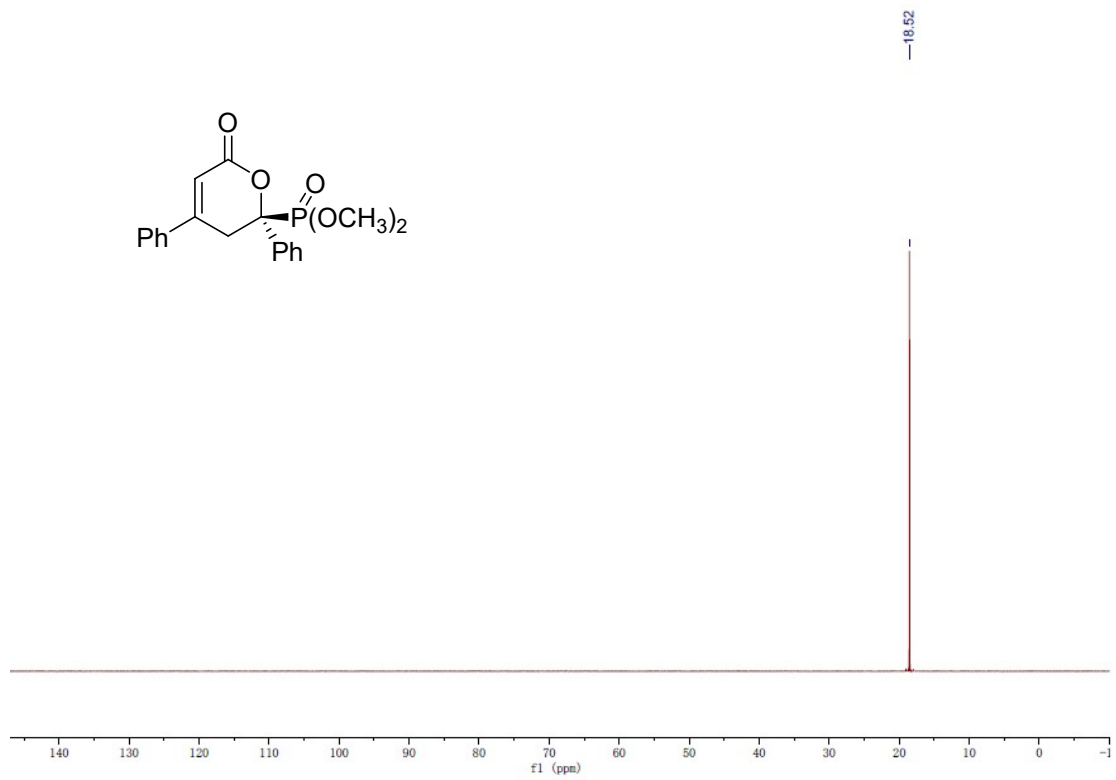

### 3u <sup>1</sup>H NMR

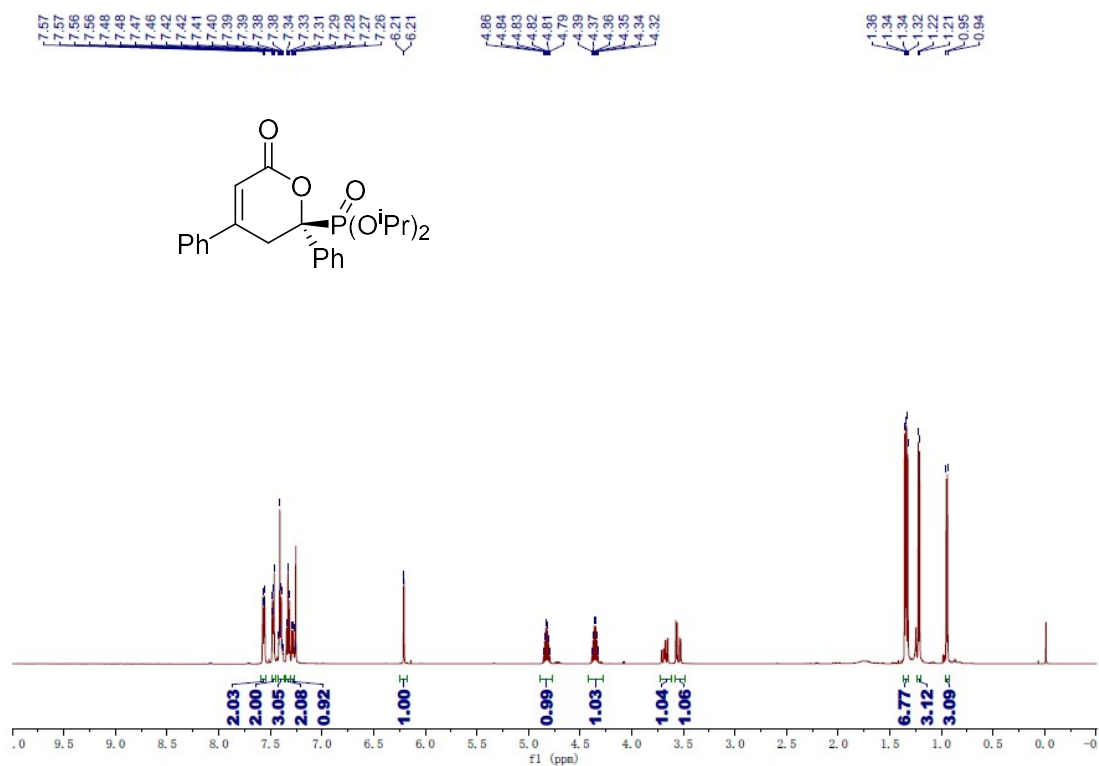

### 3u <sup>13</sup>C NMR

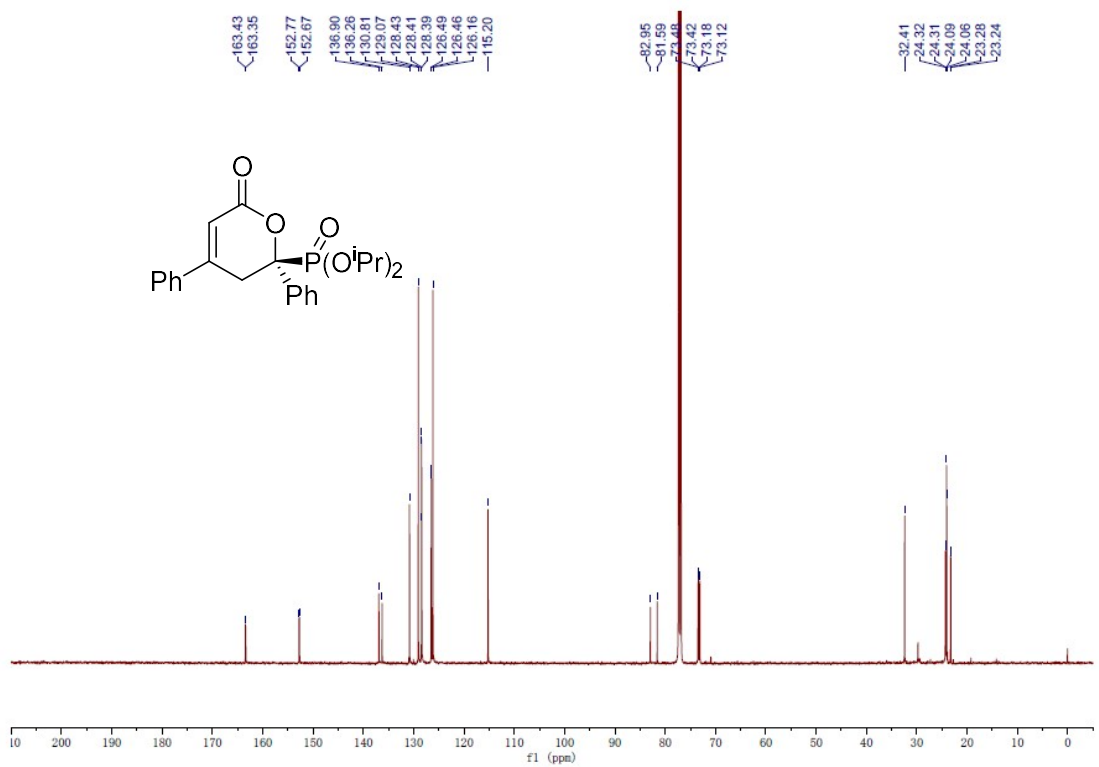

### 3u $^{31}\text{P}$ NMR

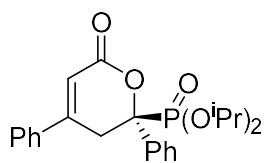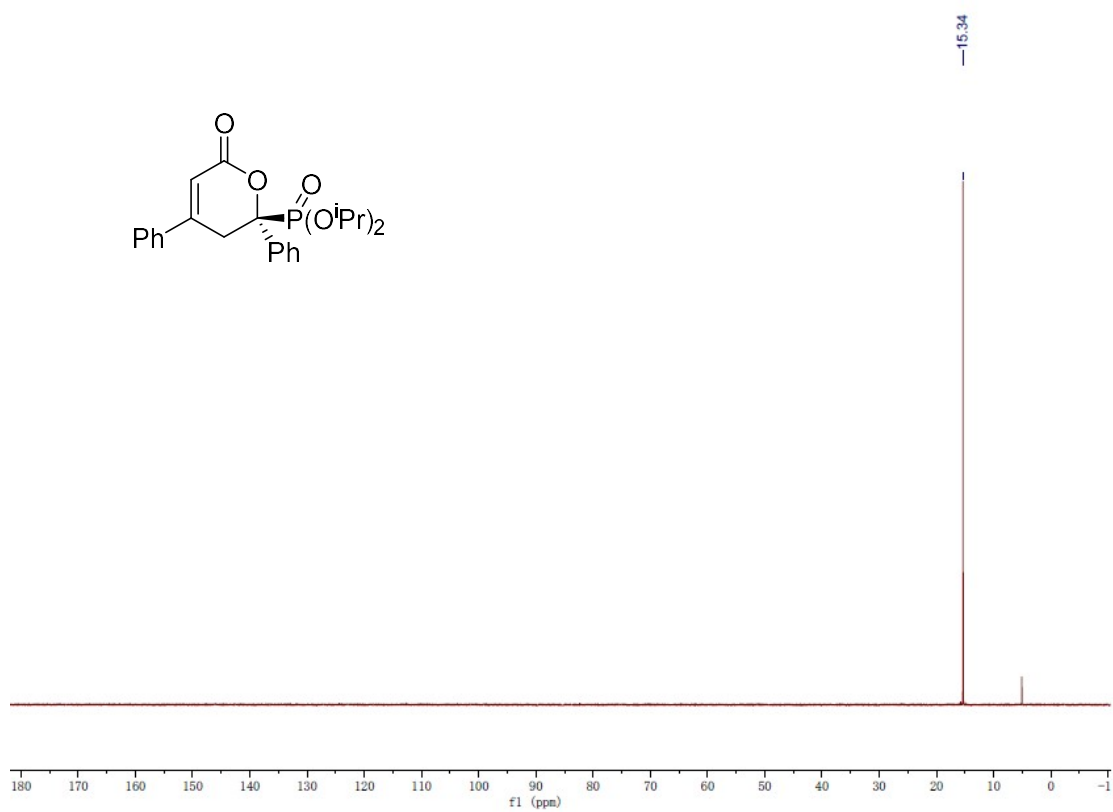

### 3v <sup>1</sup>H NMR

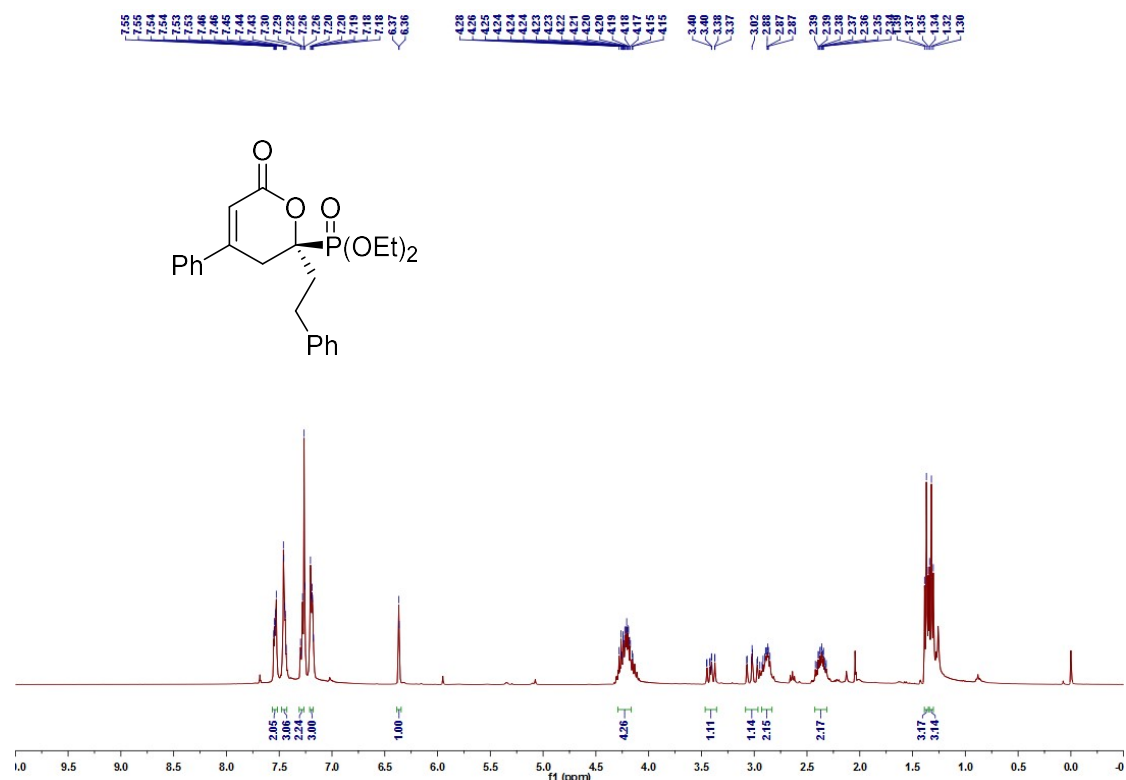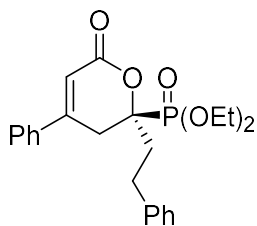

### 3v <sup>13</sup>C NMR

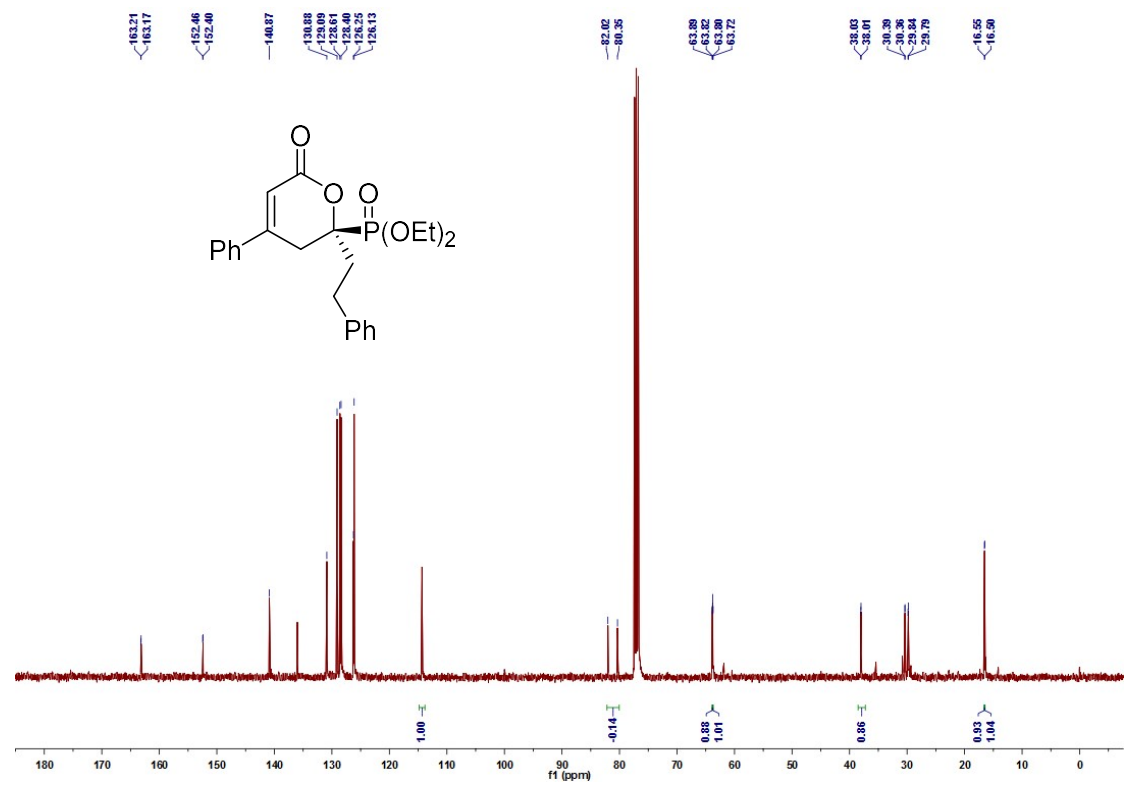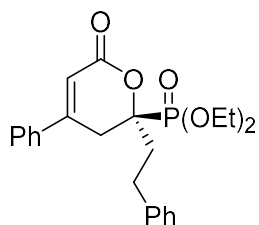

### 3v $^{31}\text{P}$ NMR

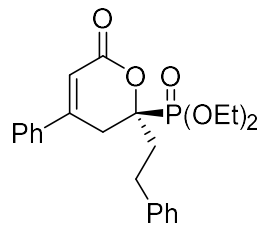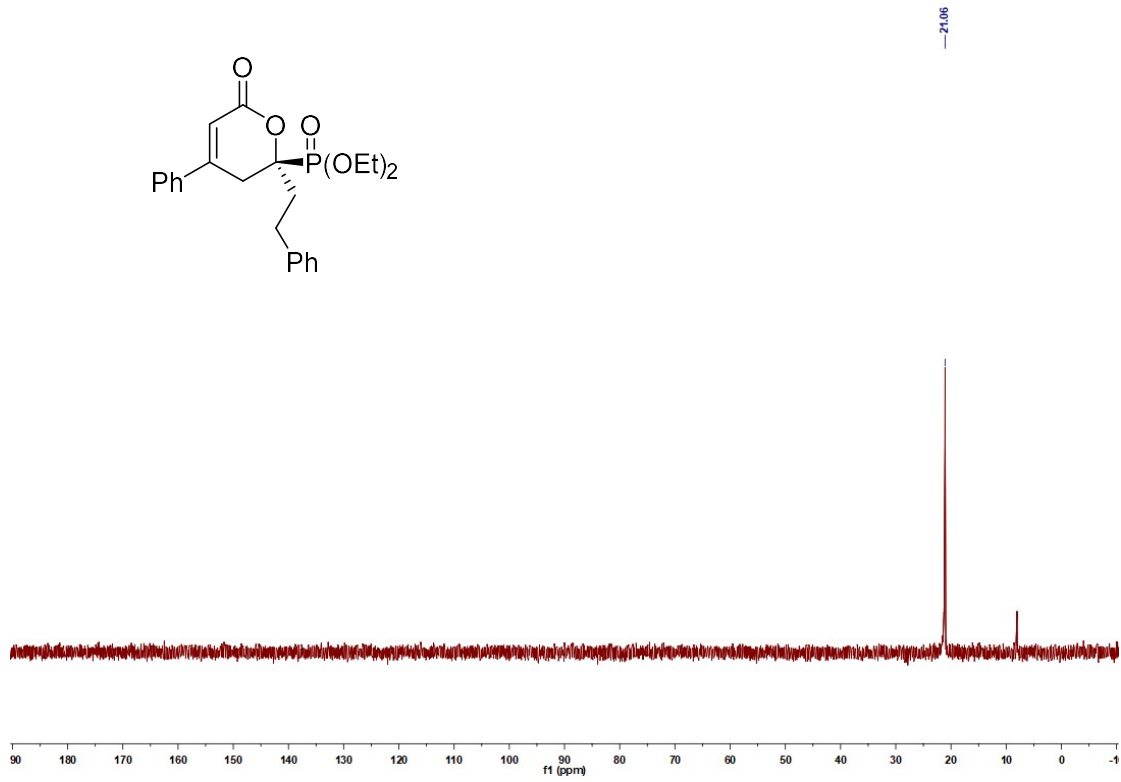

### 3w <sup>1</sup>H NMR

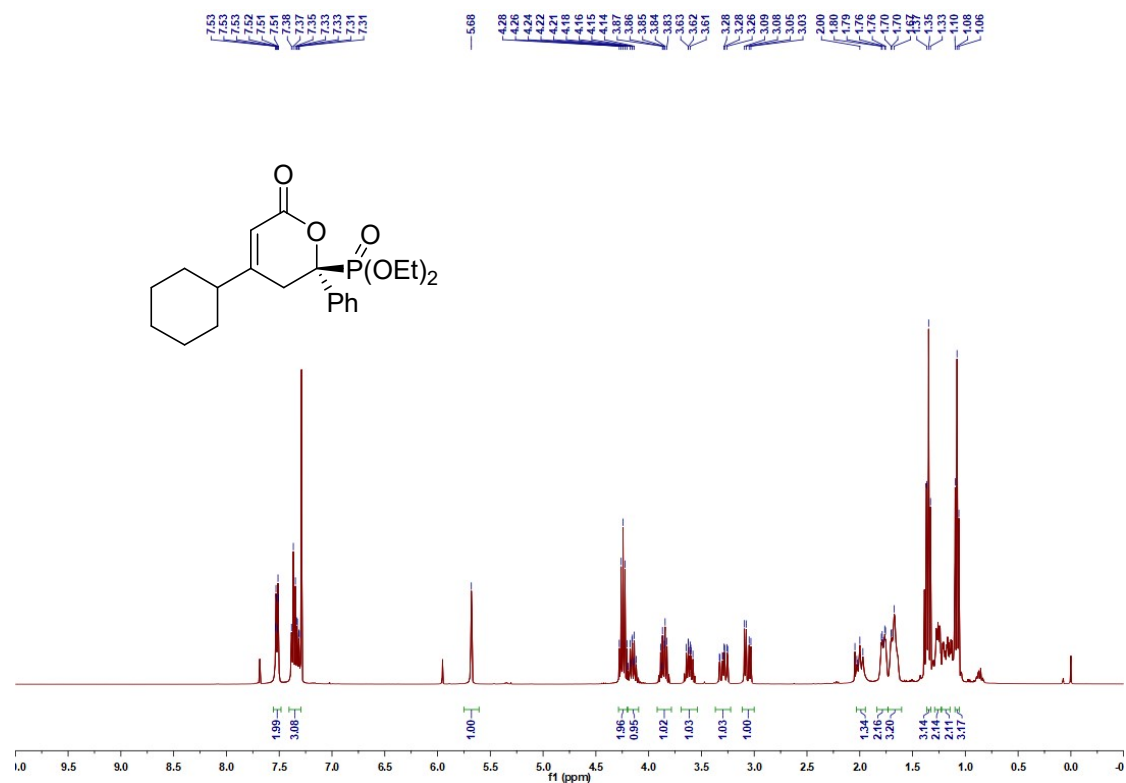

### 3w <sup>13</sup>C NMR

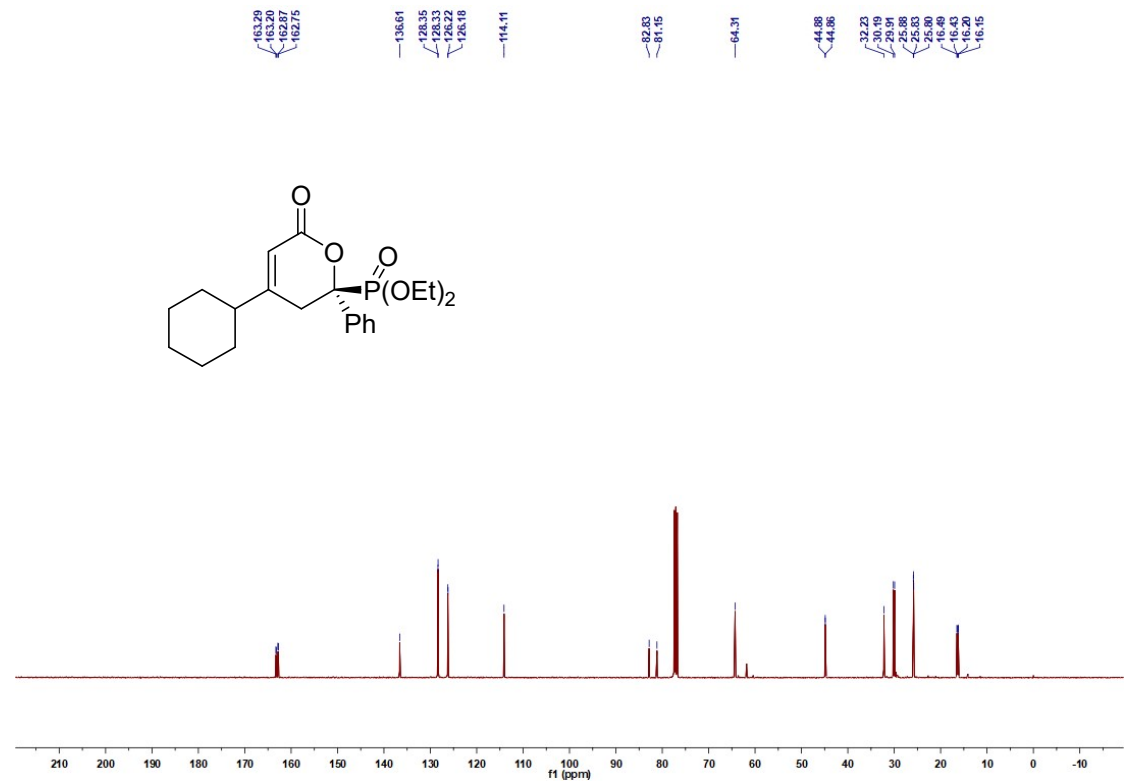

# 3w $^{31}\text{P}$ NMR

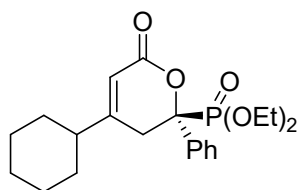

16.46

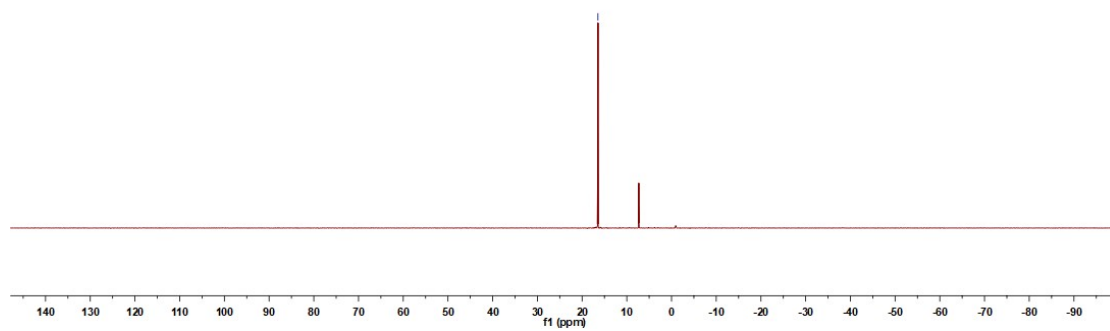

## X. HPLC spectra of products

### Racemic 3a

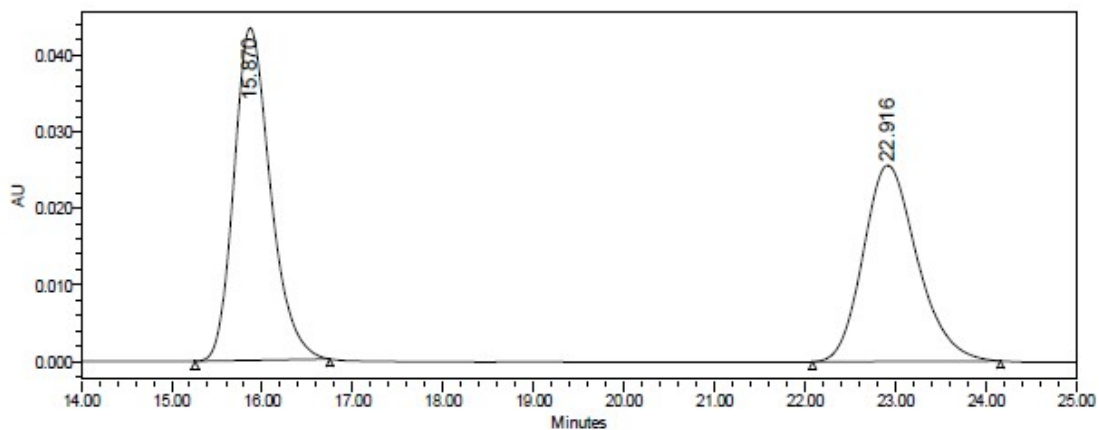

|     | RT(min) | Int Type | Width (sec) | Area      | Height  | % Area |
|-----|---------|----------|-------------|-----------|---------|--------|
| 1   | 15.870  | bb       | 89.500      | 1216502   | 43391   | 53.38  |
| 2   | 22.916  | bb       | 124.500     | 1062435   | 25612   | 46.62  |
| Sum |         |          |             | 2278937.1 | 69003.4 | 100.0  |

### Enantioenriched 3a

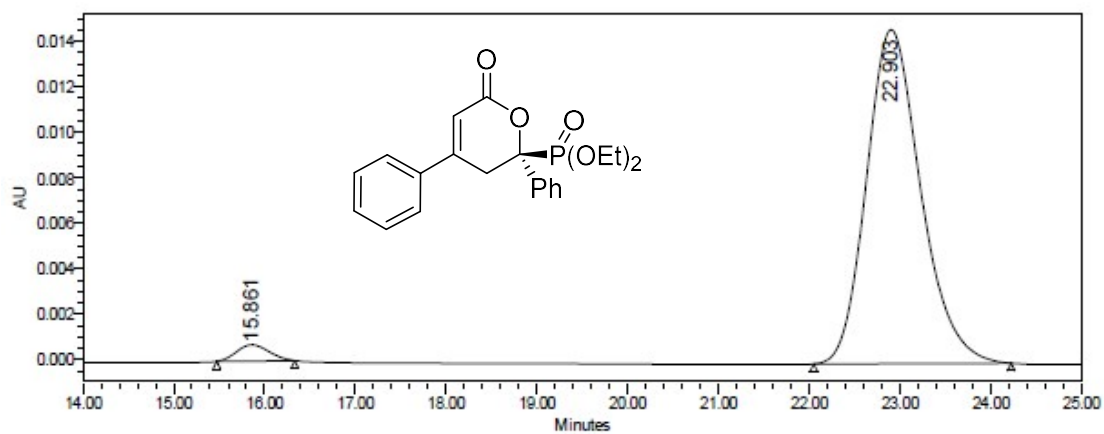

|     | RT(min) | Int Type | Width (sec) | Area     | Height  | % Area |
|-----|---------|----------|-------------|----------|---------|--------|
| 1   | 15.861  | bb       | 51.500      | 17652    | 712     | 2.81   |
| 2   | 22.903  | bb       | 130.500     | 609800   | 14687   | 97.19  |
| Sum |         |          |             | 627451.6 | 15398.6 | 100.0  |



### Racemic 3b

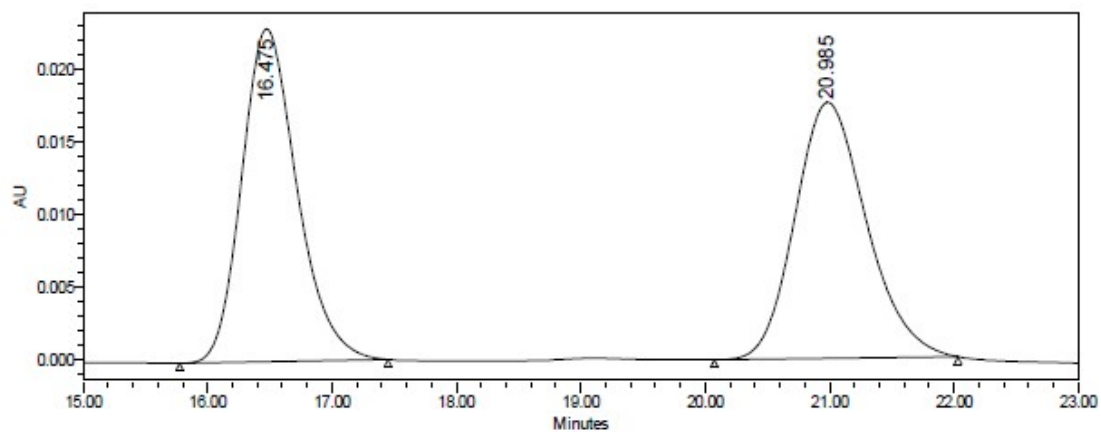

|     | RT(min) | Int Type | Width (sec) | Area      | Height  | % Area |
|-----|---------|----------|-------------|-----------|---------|--------|
| 1   | 16.475  | bb       | 100.500     | 709110    | 22961   | 50.11  |
| 2   | 20.985  | bb       | 117.500     | 705856    | 17658   | 49.89  |
| Sum |         |          |             | 1414965.8 | 40619.8 | 100.0  |

### Enantioenriched 3b

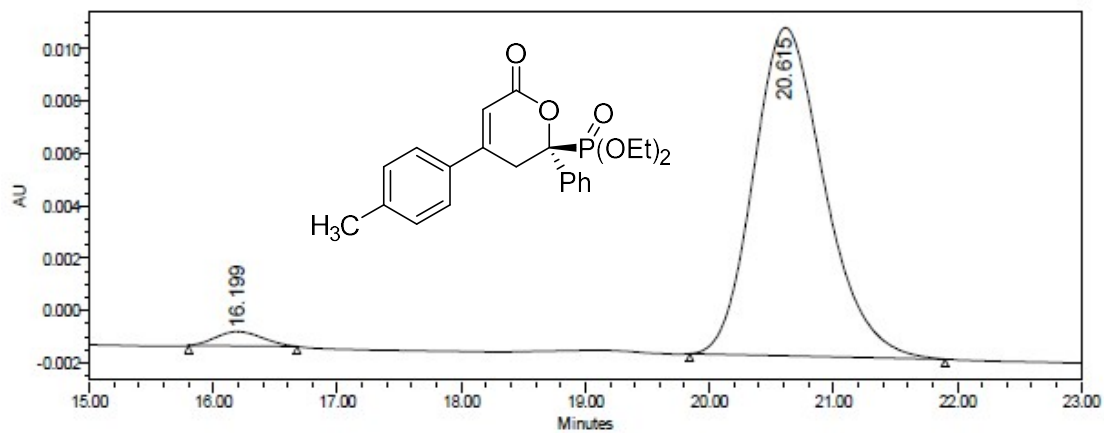

|     | RT(min) | Int Type | Width (sec) | Area     | Height  | % Area |
|-----|---------|----------|-------------|----------|---------|--------|
| 1   | 16.199  | bb       | 52.500      | 14468    | 552     | 2.82   |
| 2   | 20.615  | bb       | 123.500     | 497879   | 12543   | 97.18  |
| Sum |         |          |             | 512347.3 | 13094.7 | 100.0  |

## Racemic 3c

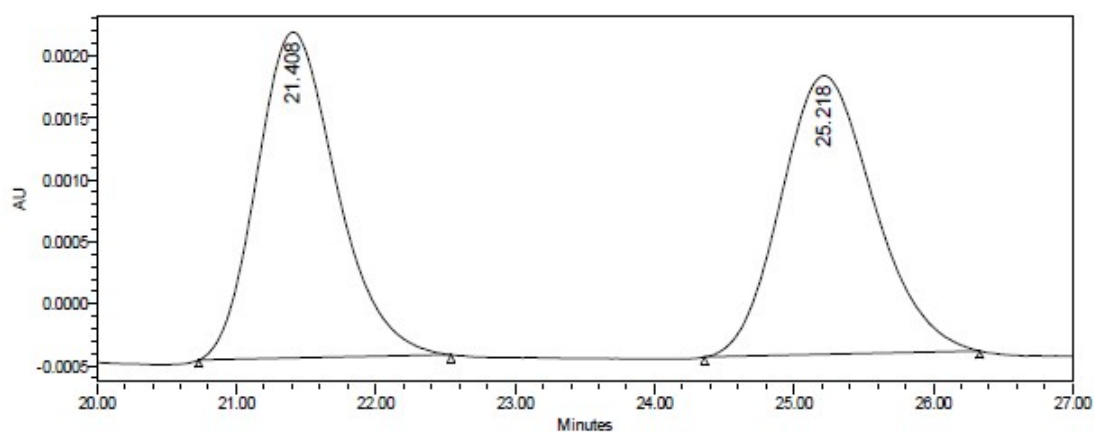

|     | RT(min) | Int Type | Width (sec) | Area     | Height | % Area |
|-----|---------|----------|-------------|----------|--------|--------|
| 1   | 21.408  | bb       | 108.500     | 104627   | 2631   | 50.04  |
| 2   | 25.218  | bb       | 118.500     | 104443   | 2250   | 49.96  |
| Sum |         |          |             | 209070.5 | 4880.5 | 100.0  |

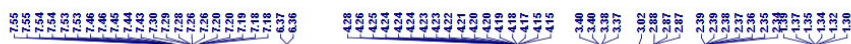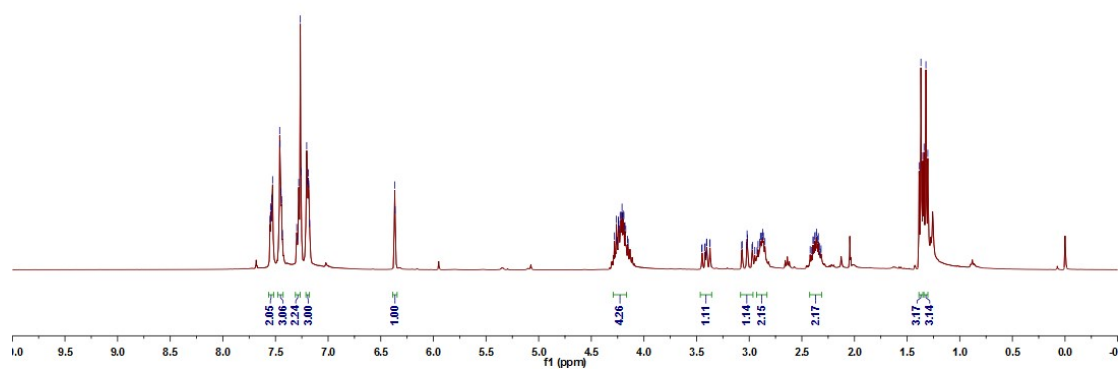

## Enantioenriched 3c

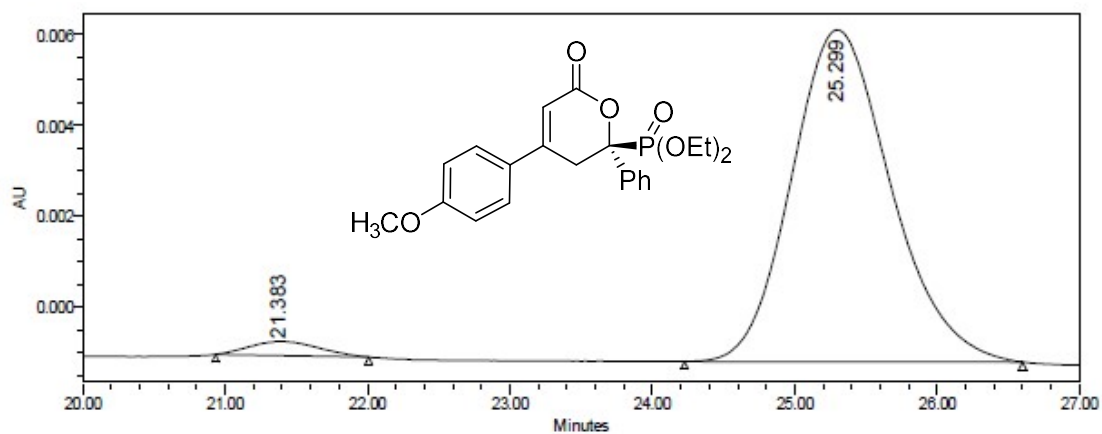

|     | RT(min) | Int Type | Width (sec) | Area     | Height | % Area |
|-----|---------|----------|-------------|----------|--------|--------|
| 1   | 21.383  | bb       | 64.500      | 10372    | 309    | 2.85   |
| 2   | 25.299  | bb       | 142.500     | 353100   | 7303   | 97.15  |
| Sum |         |          |             | 363472.6 | 7612.5 | 100.0  |

## Racemic 3d

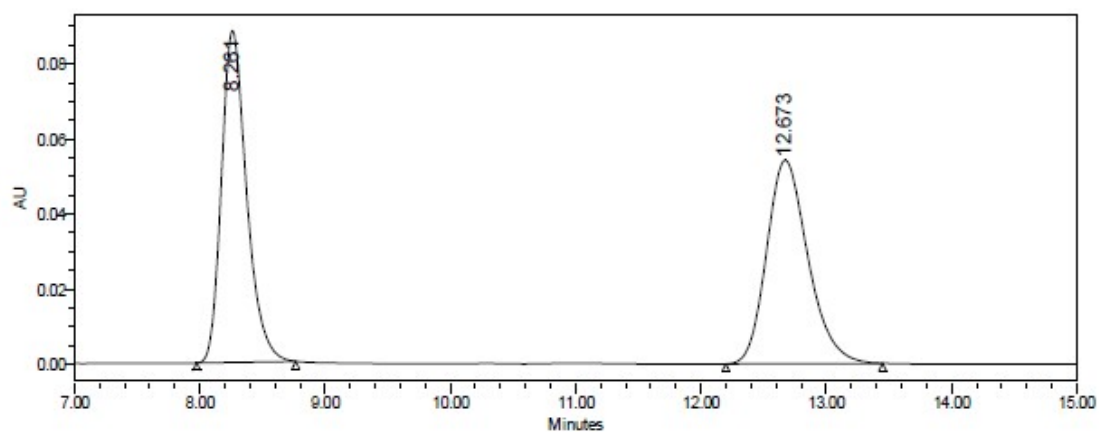

|     | RT(min) | Int Type | Width (sec) | Area      | Height   | % Area |
|-----|---------|----------|-------------|-----------|----------|--------|
| 1   | 8.261   | bb       | 47.500      | 1234277   | 88511    | 49.80  |
| 2   | 12.673  | bb       | 75.000      | 1244169   | 54275    | 50.20  |
| Sum |         |          |             | 2478445.5 | 142785.6 | 100.0  |

## Enantioenriched 3d

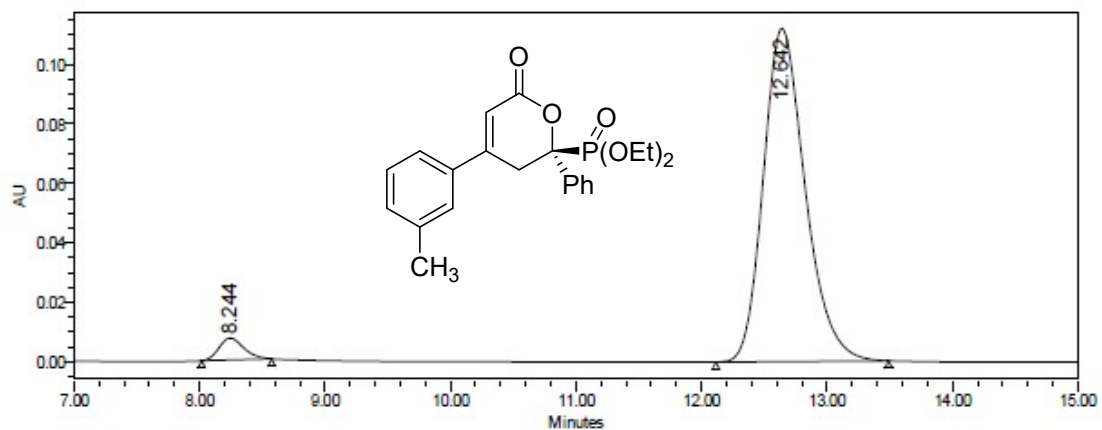

|     | RT(min) | Int Type | Width (sec) | Area      | Height   | % Area |
|-----|---------|----------|-------------|-----------|----------|--------|
| 1   | 8.244   | bb       | 33.500      | 101053    | 7371     | 3.74   |
| 2   | 12.642  | bb       | 82.500      | 2598137   | 111991   | 96.26  |
| Sum |         |          |             | 2699189.9 | 119362.1 | 100.0  |

### Racemic 3e

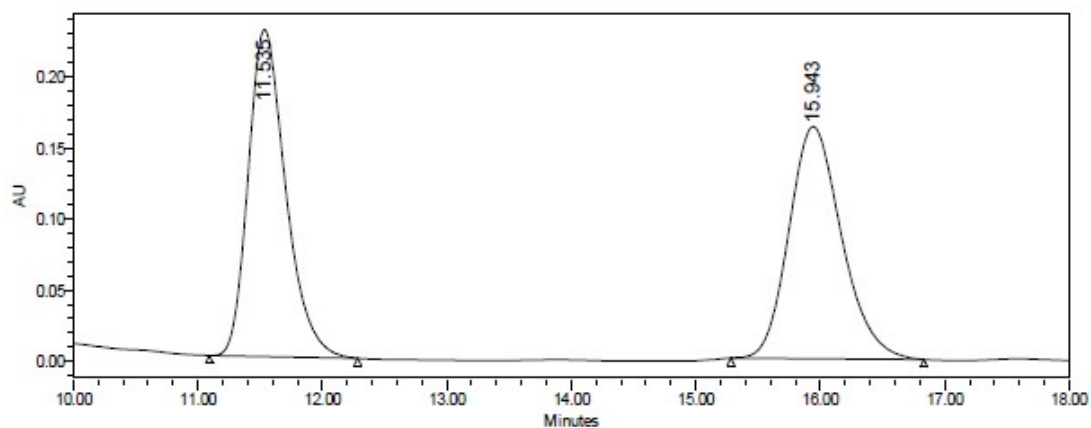

|     | RT(min) | Int Type | Width (sec) | Area      | Height   | % Area |
|-----|---------|----------|-------------|-----------|----------|--------|
| 1   | 11.535  | bb       | 71.500      | 4811559   | 230009   | 50.06  |
| 2   | 15.943  | bb       | 93.000      | 4799359   | 163162   | 49.94  |
| Sum |         |          |             | 9610917.2 | 393171.2 | 100.0  |

### Enantioenriched 3e

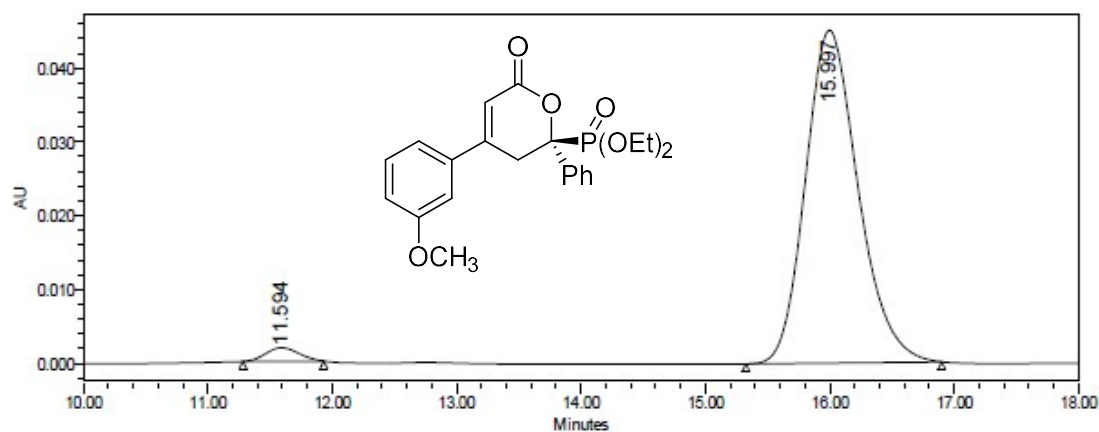

|     | RT(min) | Int Type | Width (sec) | Area      | Height  | % Area |
|-----|---------|----------|-------------|-----------|---------|--------|
| 1   | 11.594  | bb       | 39.000      | 33834     | 1833    | 2.49   |
| 2   | 15.997  | bb       | 94.500      | 1327362   | 45081   | 97.51  |
| Sum |         |          |             | 1361195.6 | 46913.8 | 100.0  |

### Racemic 3f

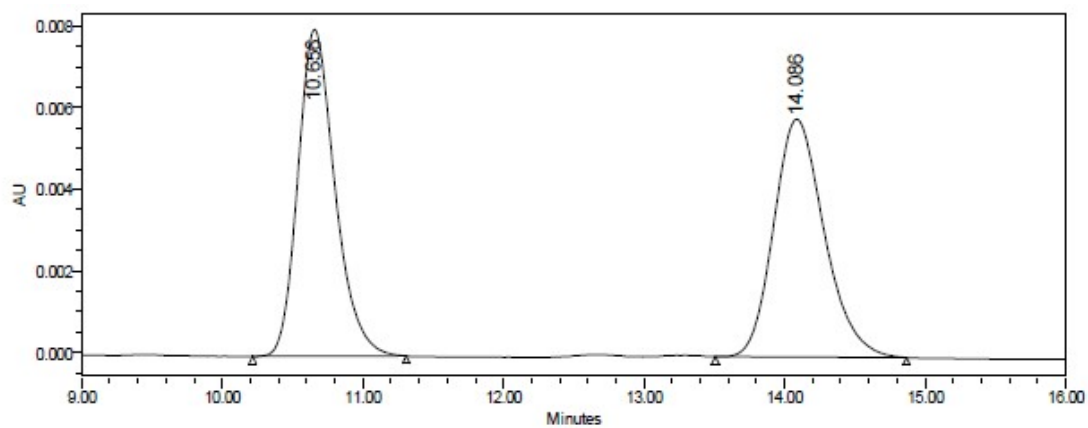

|     | RT(min) | Int Type | Width (sec) | Area     | Height  | % Area |
|-----|---------|----------|-------------|----------|---------|--------|
| 1   | 10.656  | bb       | 65.500      | 146572   | 7998    | 50.14  |
| 2   | 14.086  | bb       | 81.500      | 145750   | 5825    | 49.86  |
| Sum |         |          |             | 292322.1 | 13822.9 | 100.0  |

### Enantioenriched 3f

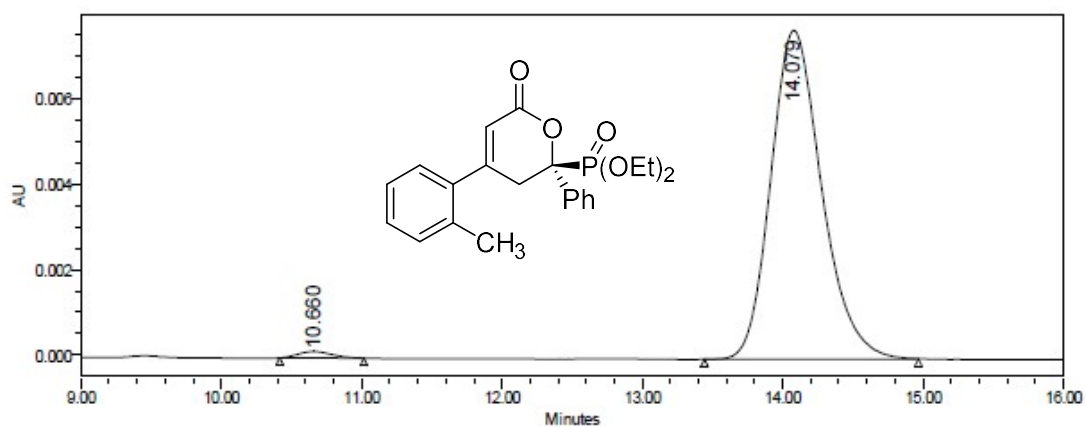

|     | RT(min) | Int Type | Width (sec) | Area     | Height | % Area |
|-----|---------|----------|-------------|----------|--------|--------|
| 1   | 10.660  | bb       | 36.000      | 2538     | 152    | 1.29   |
| 2   | 14.079  | bb       | 91.500      | 193592   | 7689   | 98.71  |
| Sum |         |          |             | 196129.5 | 7841.7 | 100.0  |

## Racemic 3g

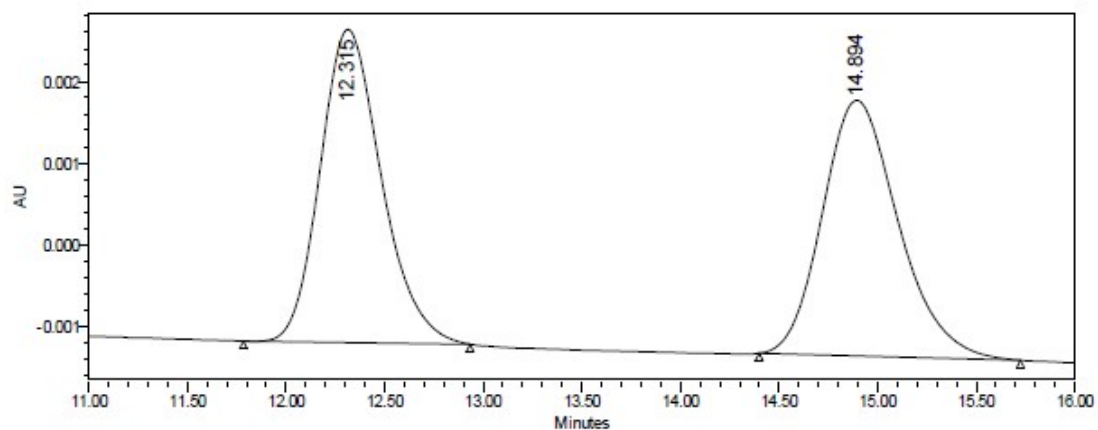

|     | RT(min) | Int Type | Width (sec) | Area     | Height | % Area |
|-----|---------|----------|-------------|----------|--------|--------|
| 1   | 12.315  | bb       | 69.000      | 83057    | 3842   | 49.78  |
| 2   | 14.894  | bb       | 79.500      | 83787    | 3136   | 50.22  |
| Sum |         |          |             | 166843.2 | 6977.8 | 100.0  |

## Enantioenriched 3g

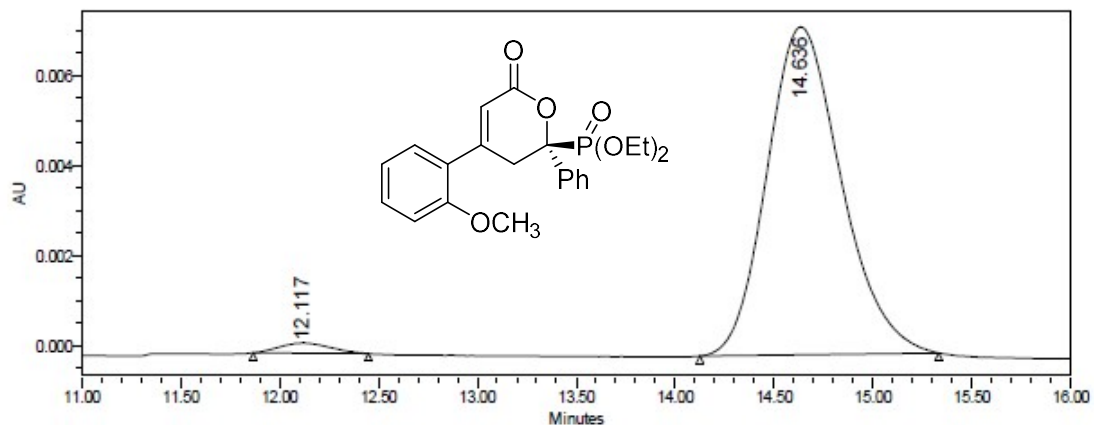

|     | RT(min) | Int Type | Width (sec) | Area     | Height | % Area |
|-----|---------|----------|-------------|----------|--------|--------|
| 1   | 12.117  | bb       | 35.000      | 3976     | 222    | 2.05   |
| 2   | 14.636  | bb       | 72.500      | 190319   | 7281   | 97.95  |
| Sum |         |          |             | 194294.9 | 7503.5 | 100.0  |

### Racemic 3h

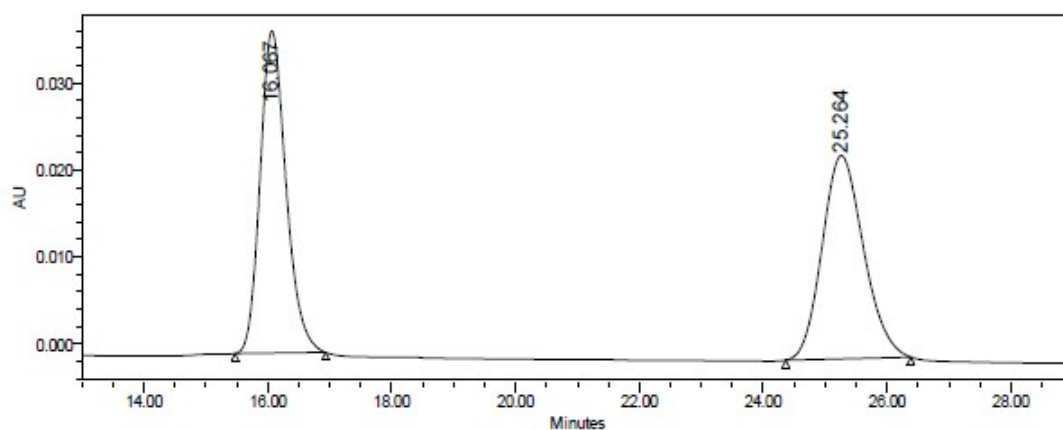

|     | RT(min) | Int Type | Width (sec) | Area      | Height  | % Area |
|-----|---------|----------|-------------|-----------|---------|--------|
| 1   | 16.067  | bb       | 87.500      | 1076200   | 37001   | 49.81  |
| 2   | 25.264  | bb       | 121.000     | 1084412   | 23338   | 50.19  |
| Sum |         |          |             | 2160612.1 | 60338.8 | 100.0  |

### Enantioenriched 3h

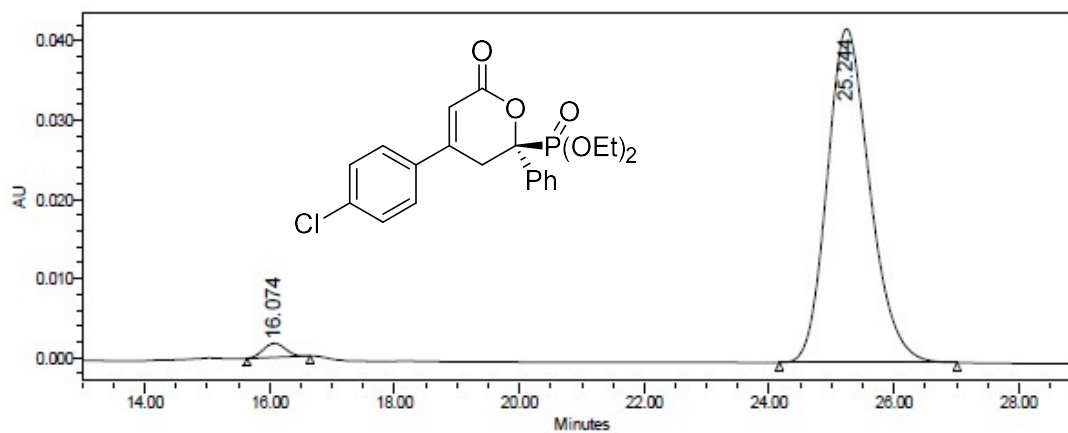

|     | RT(min) | Int Type | Width (sec) | Area      | Height  | % Area |
|-----|---------|----------|-------------|-----------|---------|--------|
| 1   | 16.074  | bb       | 60.500      | 43345     | 1760    | 2.12   |
| 2   | 25.244  | bb       | 171.000     | 2003099   | 42129   | 97.88  |
| Sum |         |          |             | 2046444.0 | 43889.1 | 100.0  |



### Racemic 3i

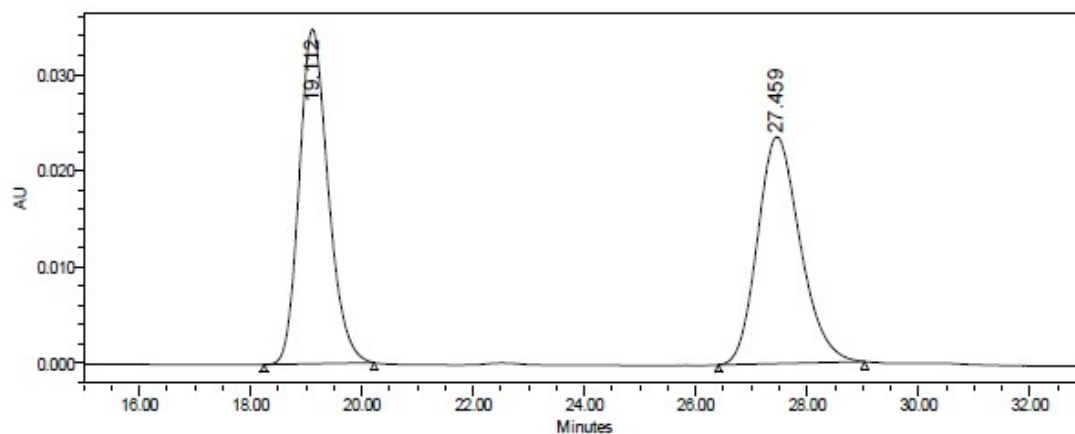

|     | RT(min) | Int Type | Width (sec) | Area      | Height  | % Area |
|-----|---------|----------|-------------|-----------|---------|--------|
| 1   | 19.112  | bb       | 118.500     | 1254169   | 34745   | 50.01  |
| 2   | 27.459  | bb       | 157.500     | 1253623   | 23564   | 49.99  |
| Sum |         |          |             | 2507791.9 | 58309.2 | 100.0  |

### Enantioenriched 3i

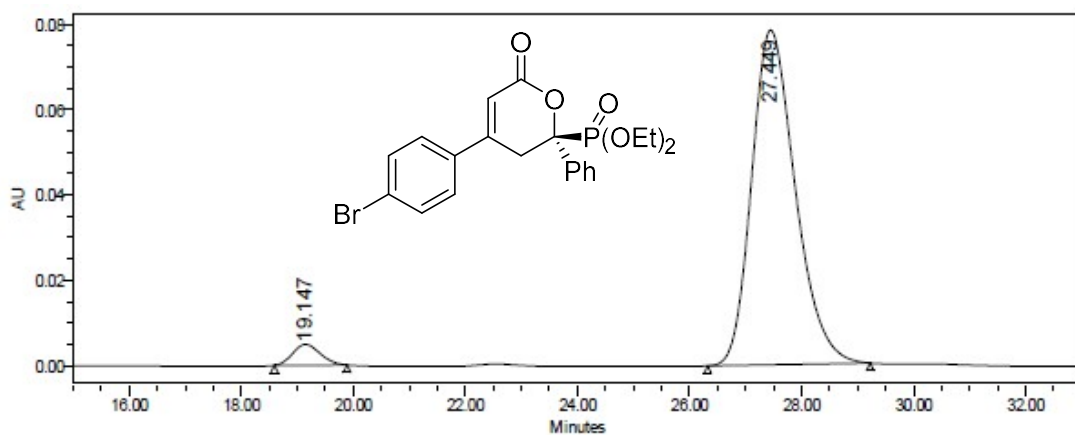

|     | RT(min) | Int Type | Width (sec) | Area      | Height  | % Area |
|-----|---------|----------|-------------|-----------|---------|--------|
| 1   | 19.147  | bb       | 78.000      | 167356    | 4894    | 3.79   |
| 2   | 27.449  | bb       | 174.000     | 4242566   | 78444   | 96.21  |
| Sum |         |          |             | 4409922.7 | 83337.2 | 100.0  |

## Racemic 3j

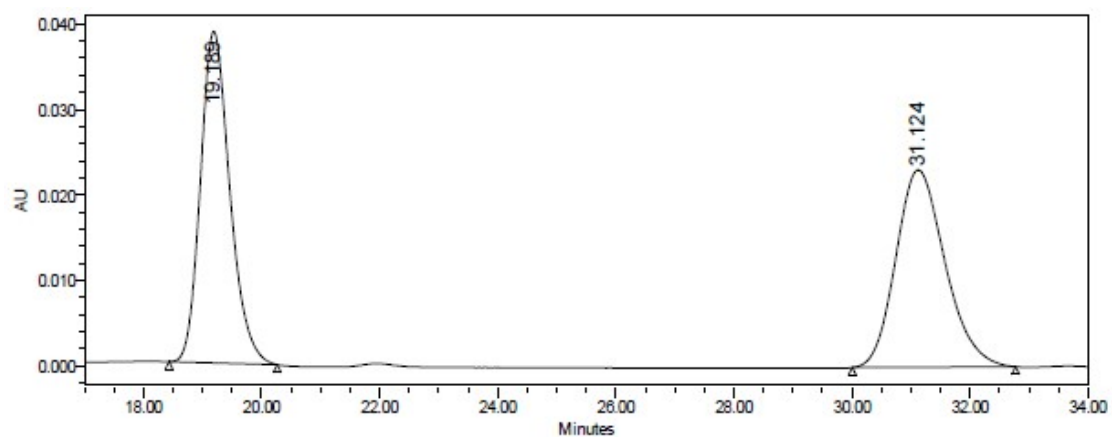

|     | RT(min) | Int Type | Width (sec) | Area      | Height  | % Area |
|-----|---------|----------|-------------|-----------|---------|--------|
| 1   | 19.189  | bb       | 110.000     | 1341899   | 38803   | 50.10  |
| 2   | 31.124  | bb       | 166.000     | 1336772   | 23107   | 49.90  |
| Sum |         |          |             | 2678670.6 | 61910.9 | 100.0  |

## Enantioenriched 3j

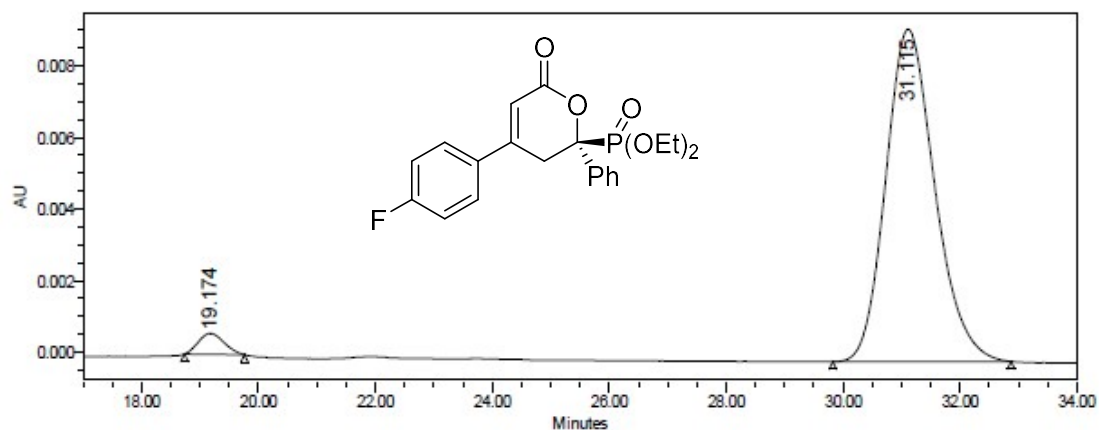

|     | RT(min) | Int Type | Width (sec) | Area     | Height | % Area |
|-----|---------|----------|-------------|----------|--------|--------|
| 1   | 19.174  | bb       | 61.500      | 17817    | 584    | 3.19   |
| 2   | 31.115  | bb       | 183.000     | 540604   | 9295   | 96.81  |
| Sum |         |          |             | 558420.9 | 9878.9 | 100.0  |

### Racemic 3k

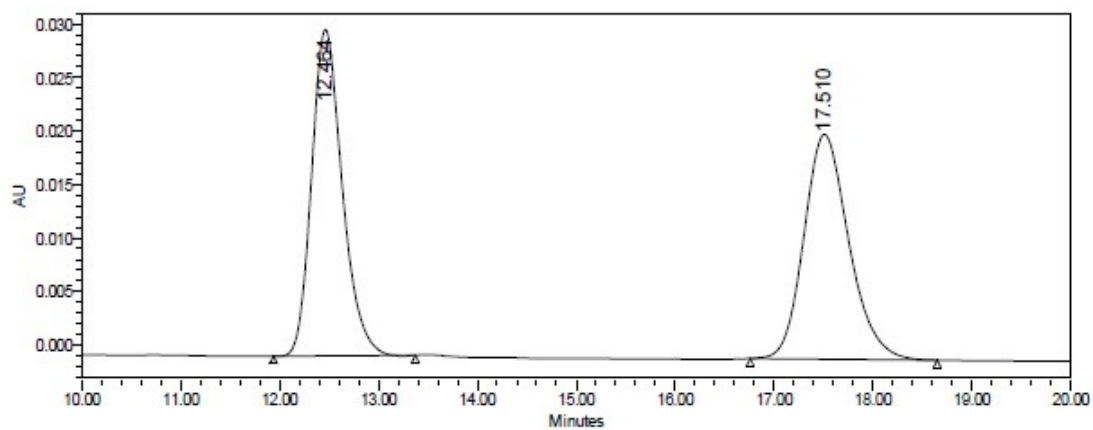

|     | RT(min) | Int Type | Width (sec) | Area      | Height  | % Area |
|-----|---------|----------|-------------|-----------|---------|--------|
| 1   | 12.464  | bb       | 86.000      | 656910    | 30480   | 49.77  |
| 2   | 17.510  | bb       | 113.500     | 662919    | 21007   | 50.23  |
| Sum |         |          |             | 1319829.6 | 51486.4 | 100.0  |

### Enantioenriched 3k

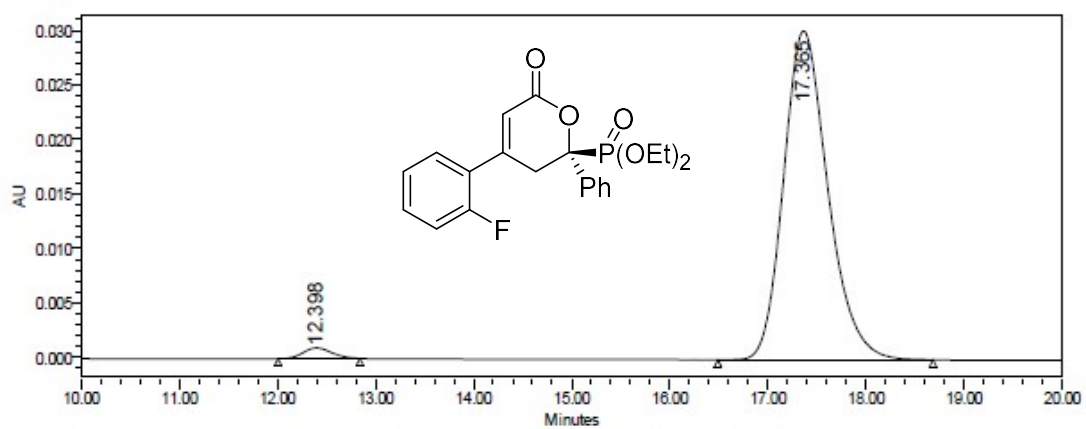

|     | RT(min) | Int Type | Width (sec) | Area     | Height  | % Area |
|-----|---------|----------|-------------|----------|---------|--------|
| 1   | 12.398  | bb       | 50.000      | 19801    | 983     | 2.05   |
| 2   | 17.365  | bb       | 131.500     | 947072   | 30172   | 97.95  |
| Sum |         |          |             | 966873.1 | 31154.5 | 100.0  |

## Racemic 3I

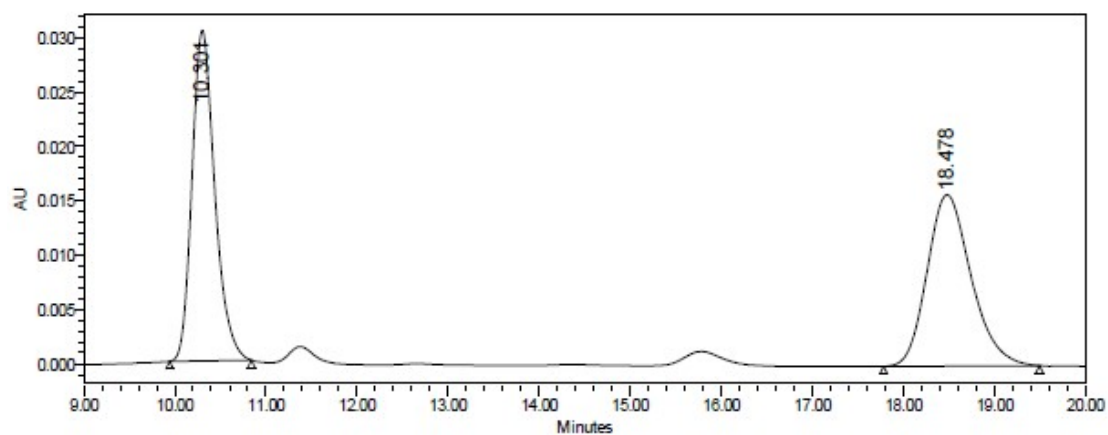

|     | RT(min) | Int Type | Width (sec) | Area      | Height  | % Area |
|-----|---------|----------|-------------|-----------|---------|--------|
| 1   | 10.301  | bb       | 54.000      | 528010    | 30418   | 50.00  |
| 2   | 18.478  | bb       | 102.500     | 528017    | 15766   | 50.00  |
| Sum |         |          |             | 1056026.9 | 46184.9 | 100.0  |

## Enantioenriched 3I

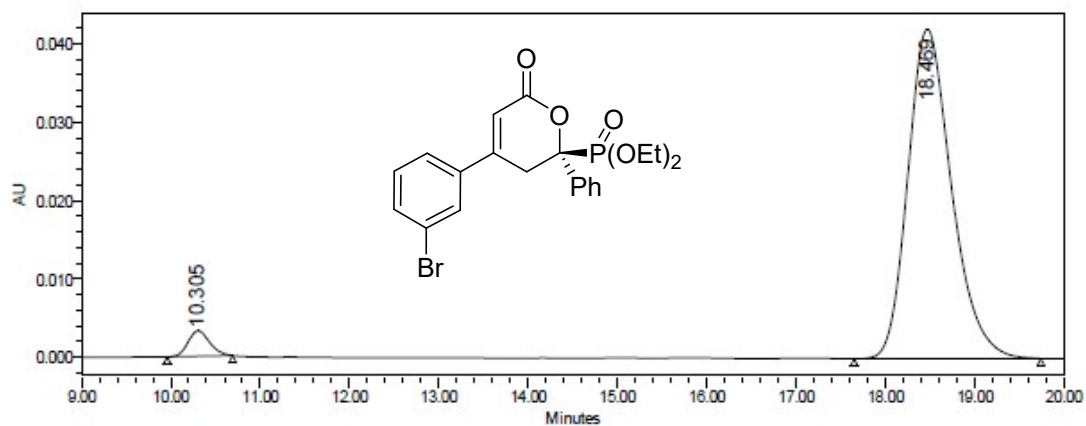

|     | RT(min) | Int Type | Width (sec) | Area      | Height  | % Area |
|-----|---------|----------|-------------|-----------|---------|--------|
| 1   | 10.305  | bb       | 44.000      | 54480     | 3248    | 3.68   |
| 2   | 18.469  | bb       | 125.500     | 1426690   | 42026   | 96.32  |
| Sum |         |          |             | 1481170.5 | 45273.9 | 100.0  |

## Racemic 3m

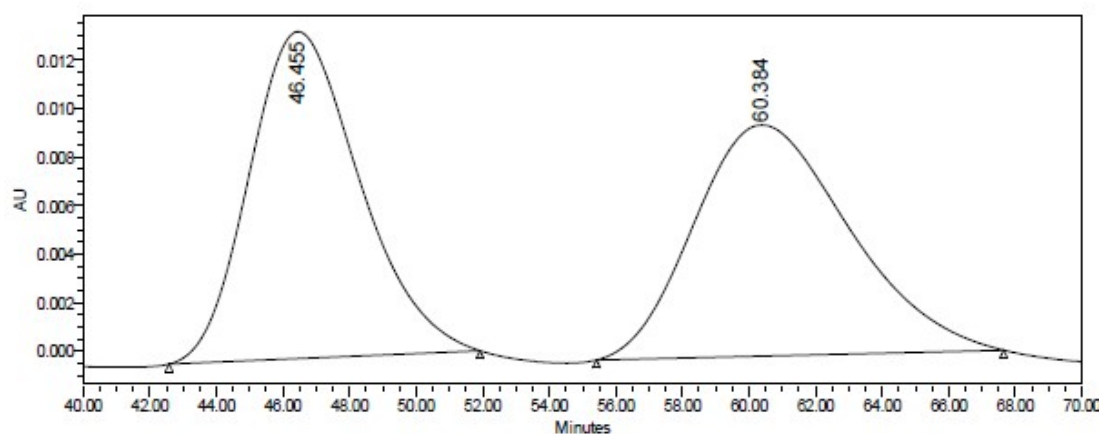

|     | RT(min) | Int Type | Width (sec) | Area      | Height  | % Area |
|-----|---------|----------|-------------|-----------|---------|--------|
| 1   | 46.455  | bb       | 560.500     | 3091829   | 13471   | 50.12  |
| 2   | 60.384  | bb       | 734.000     | 3077422   | 9514    | 49.88  |
| Sum |         |          |             | 6169250.2 | 22985.8 | 100.0  |

## Enantioenriched 3m

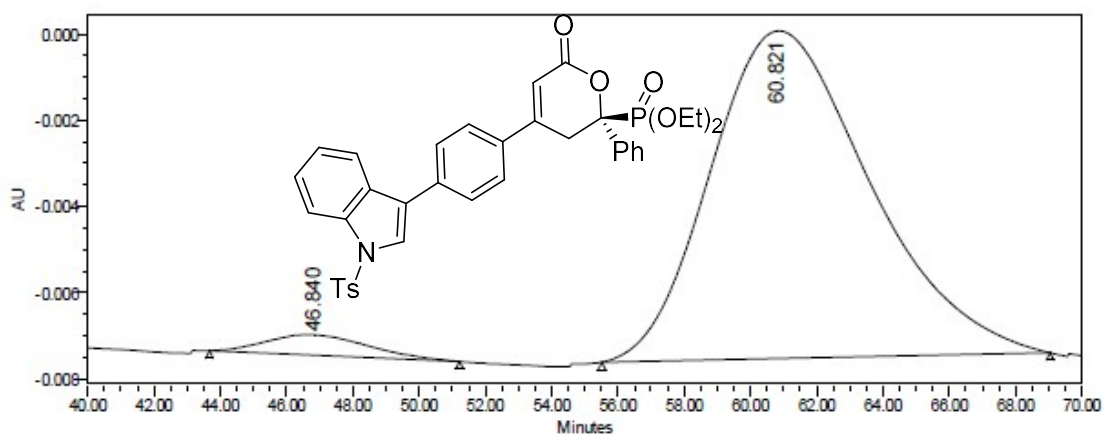

|     | RT(min) | Int Type | Width (sec) | Area      | Height | % Area |
|-----|---------|----------|-------------|-----------|--------|--------|
| 1   | 46.840  | bb       | 453.000     | 101939    | 475    | 3.86   |
| 2   | 60.821  | bb       | 811.500     | 2536772   | 7601   | 96.14  |
| Sum |         |          |             | 2638710.9 | 8076.1 | 100.0  |

## Racemic 3n

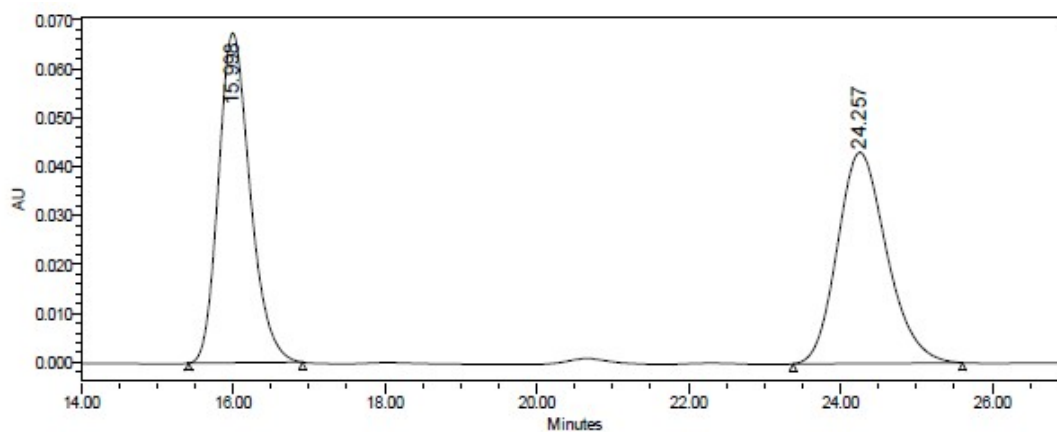

|     | RT(min) | Int Type | Width (sec) | Area      | Height   | % Area |
|-----|---------|----------|-------------|-----------|----------|--------|
| 1   | 15.998  | bb       | 90.000      | 1956543   | 67459    | 50.11  |
| 2   | 24.257  | bb       | 134.000     | 1947890   | 43159    | 49.89  |
| Sum |         |          |             | 3904433.5 | 110617.5 | 100.0  |

## Enantioenriched 3n

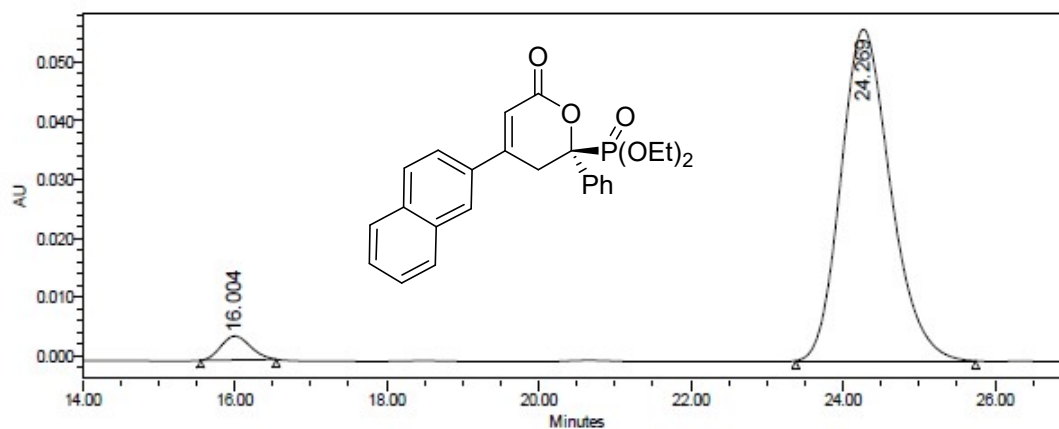

|     | RT(min) | Int Type | Width (sec) | Area      | Height  | % Area |
|-----|---------|----------|-------------|-----------|---------|--------|
| 1   | 16.004  | bb       | 59.500      | 109207    | 4064    | 4.09   |
| 2   | 24.269  | bb       | 142.000     | 2560075   | 56371   | 95.91  |
| Sum |         |          |             | 2669282.4 | 60434.7 | 100.0  |

## Racemic 3o

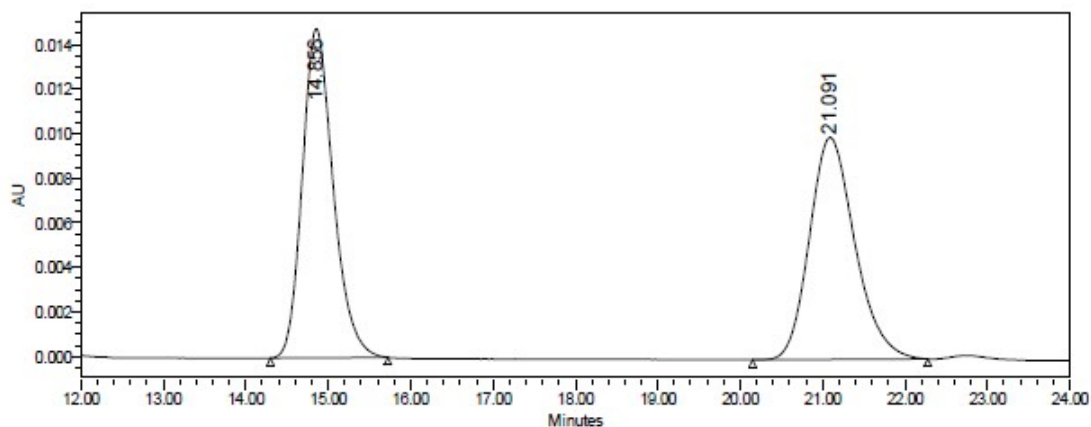

|     | RT(min) | Int Type | Width (sec) | Area     | Height  | % Area |
|-----|---------|----------|-------------|----------|---------|--------|
| 1   | 14.856  | bb       | 85.500      | 385535   | 14776   | 50.25  |
| 2   | 21.091  | bb       | 127.500     | 381706   | 9965    | 49.75  |
| Sum |         |          |             | 767240.9 | 24741.2 | 100.0  |

## Enantioenriched 3o

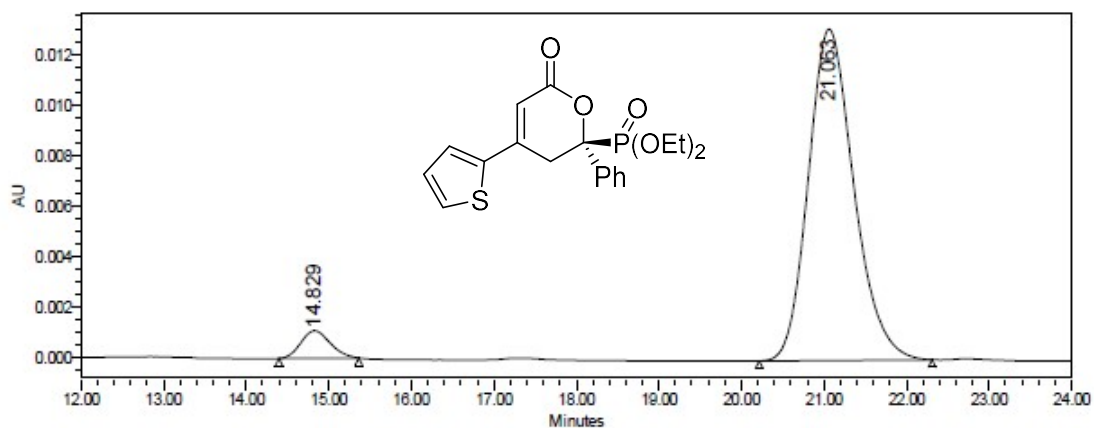

|     | RT(min) | Int Type | Width (sec) | Area     | Height  | % Area |
|-----|---------|----------|-------------|----------|---------|--------|
| 1   | 14.829  | bb       | 58.000      | 26834    | 1088    | 5.07   |
| 2   | 21.063  | bb       | 125.500     | 502442   | 13104   | 94.93  |
| Sum |         |          |             | 529275.4 | 14191.8 | 100.0  |

### Racemic 3p

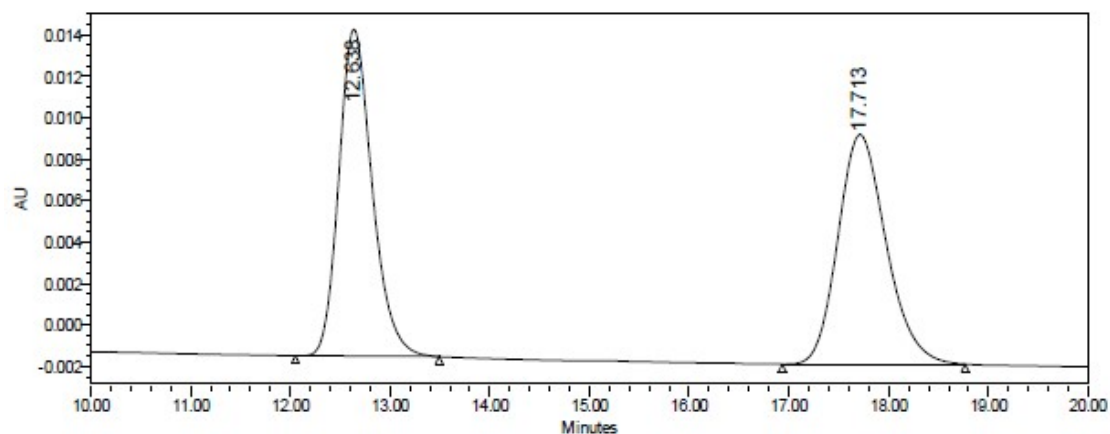

|     | RT(min) | Int Type | Width (sec) | Area     | Height  | % Area |
|-----|---------|----------|-------------|----------|---------|--------|
| 1   | 12.638  | bb       | 86.500      | 366562   | 15771   | 49.62  |
| 2   | 17.713  | bb       | 110.000     | 372138   | 11080   | 50.38  |
| Sum |         |          |             | 738700.2 | 26850.0 | 100.0  |

### Enantioenriched 3p

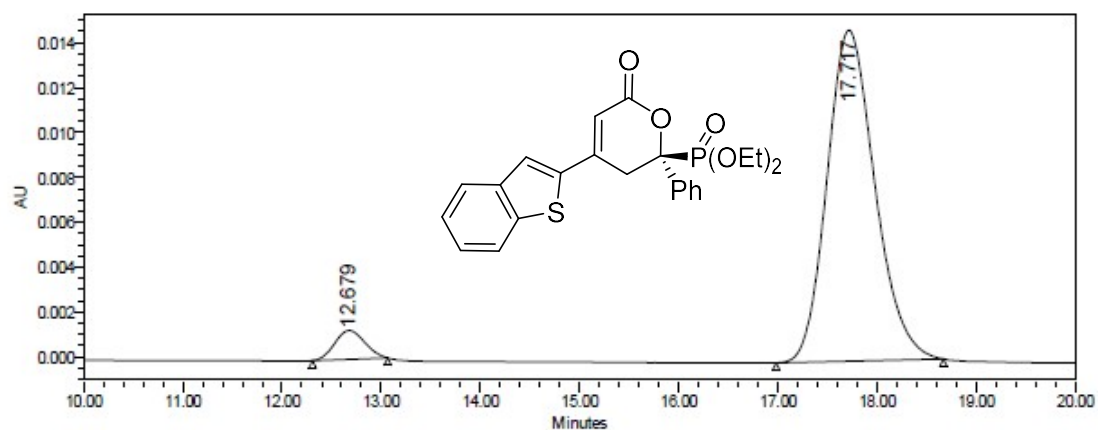

|     | RT(min) | Int Type | Width (sec) | Area     | Height  | % Area |
|-----|---------|----------|-------------|----------|---------|--------|
| 1   | 12.679  | bb       | 45.500      | 26936    | 1288    | 5.17   |
| 2   | 17.717  | bb       | 101.000     | 494349   | 14758   | 94.83  |
| Sum |         |          |             | 521285.5 | 16046.0 | 100.0  |



## Racemic 3q

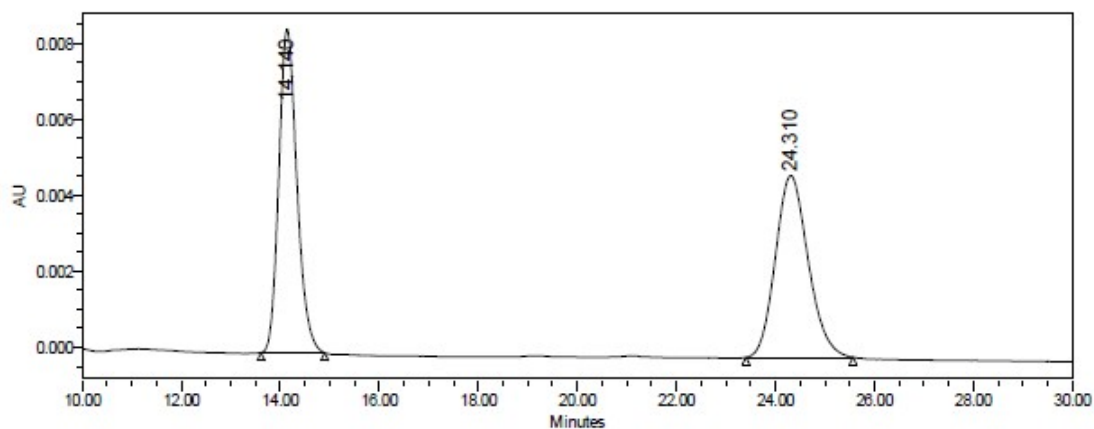

|     | RT(min) | Int Type | Width (sec) | Area     | Height  | % Area |
|-----|---------|----------|-------------|----------|---------|--------|
| 1   | 14.140  | bb       | 77.500      | 216526   | 8527    | 49.64  |
| 2   | 24.310  | bb       | 129.500     | 219625   | 4785    | 50.36  |
| Sum |         |          |             | 436151.4 | 13311.4 | 100.0  |

## Enantioenriched 3q

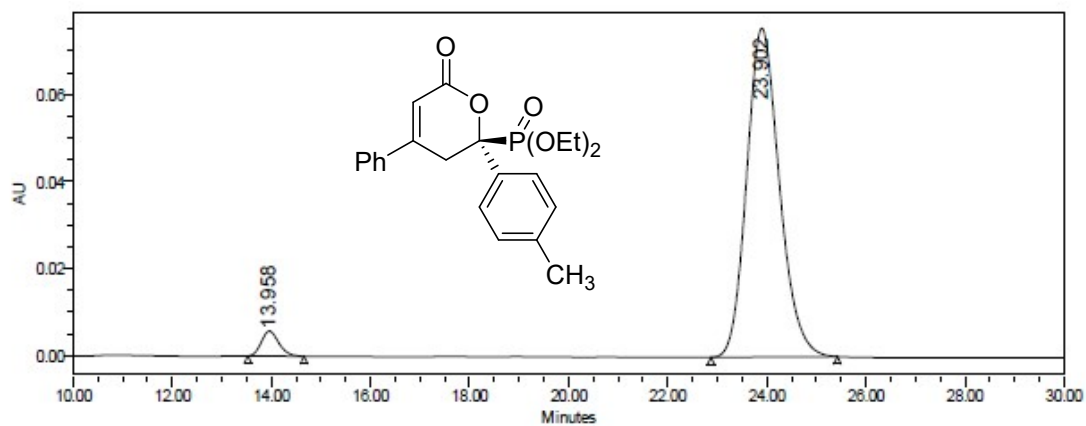

|     | RT(min) | Int Type | Width (sec) | Area      | Height  | % Area |
|-----|---------|----------|-------------|-----------|---------|--------|
| 1   | 13.958  | bb       | 68.000      | 141488    | 5736    | 3.93   |
| 2   | 23.902  | bb       | 153.000     | 3463041   | 75443   | 96.07  |
| Sum |         |          |             | 3604529.7 | 81178.3 | 100.0  |

## Racemic 3r

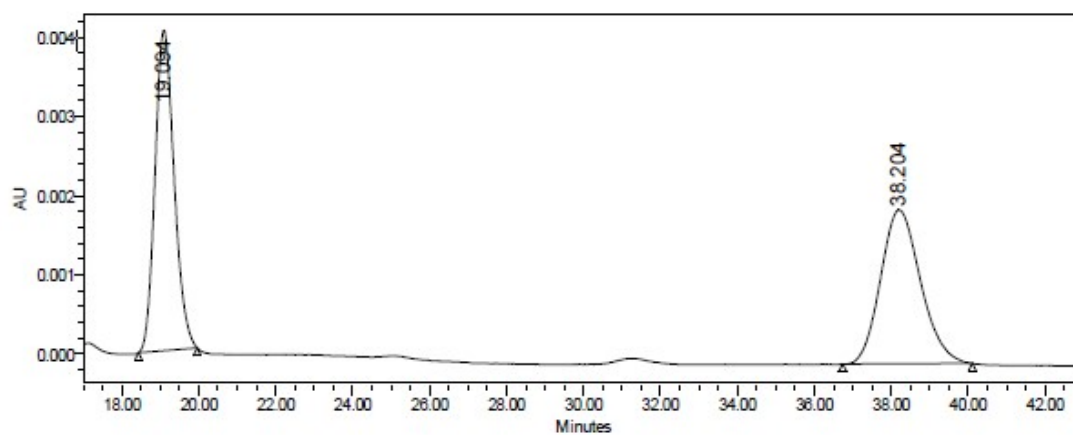

|     | RT(min) | Int Type | Width (sec) | Area     | Height | % Area |
|-----|---------|----------|-------------|----------|--------|--------|
| 1   | 19.094  | bb       | 91.500      | 139634   | 4053   | 49.87  |
| 2   | 38.204  | bb       | 202.500     | 140380   | 1946   | 50.13  |
| Sum |         |          |             | 280014.1 | 5999.5 | 100.0  |

## Enantioenriched 3r

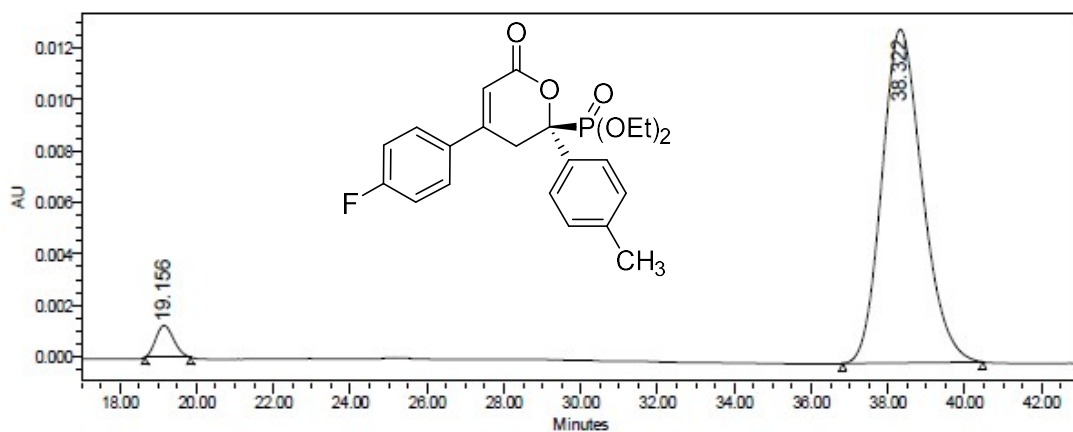

|     | RT(min) | Int Type | Width (sec) | Area     | Height  | % Area |
|-----|---------|----------|-------------|----------|---------|--------|
| 1   | 19.156  | bb       | 71.000      | 40162    | 1239    | 4.06   |
| 2   | 38.322  | bb       | 218.500     | 949971   | 12976   | 95.94  |
| Sum |         |          |             | 990133.1 | 14215.6 | 100.0  |

### Racemic 3s

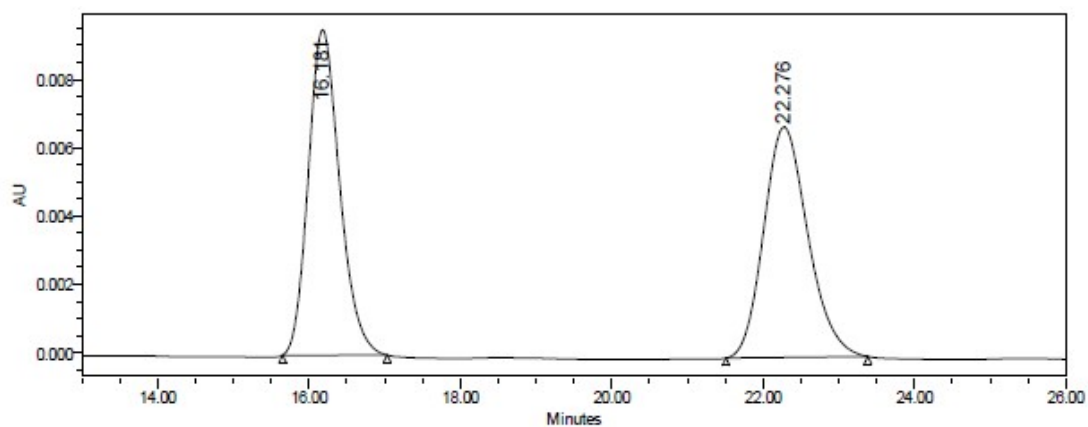

|     | RT(min) | Int Type | Width (sec) | Area     | Height  | % Area |
|-----|---------|----------|-------------|----------|---------|--------|
| 1   | 16.181  | bb       | 83.000      | 274608   | 9530    | 50.09  |
| 2   | 22.276  | bb       | 112.500     | 273571   | 6746    | 49.91  |
| Sum |         |          |             | 548178.9 | 16276.2 | 100.0  |

### Enantioenriched 3s

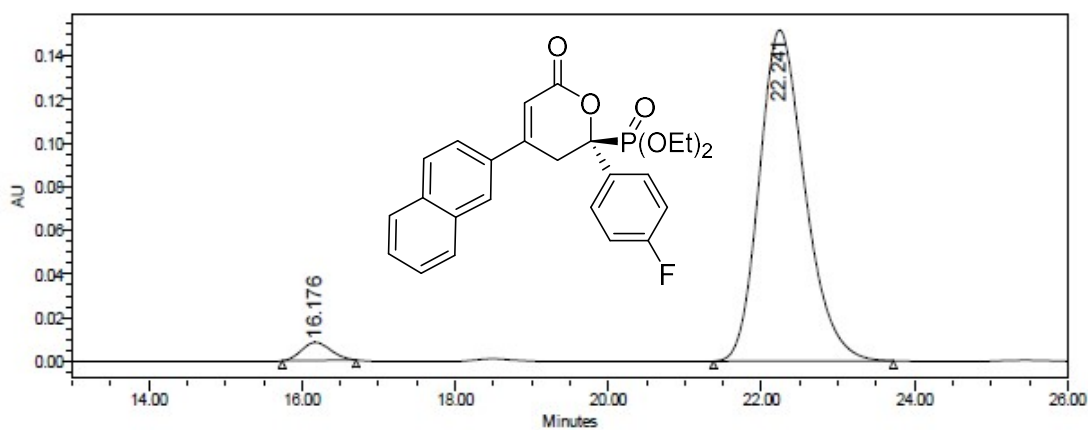

|     | RT(min) | Int Type | Width (sec) | Area      | Height   | % Area |
|-----|---------|----------|-------------|-----------|----------|--------|
| 1   | 16.176  | bb       | 58.000      | 220445    | 8285     | 3.39   |
| 2   | 22.241  | bb       | 141.000     | 6282591   | 151784   | 96.61  |
| Sum |         |          |             | 6503035.8 | 160069.1 | 100.0  |

## Racemic 3t

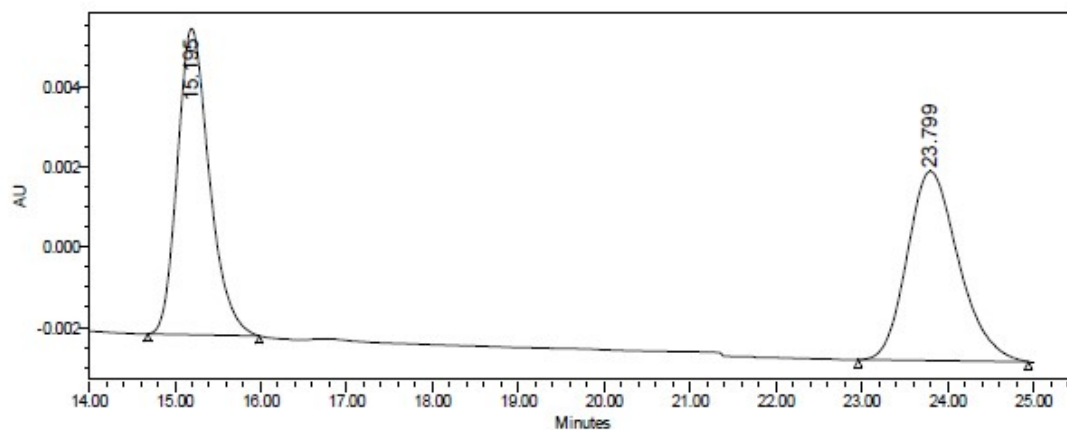

|     | RT(min) | Int Type | Width (sec) | Area     | Height  | % Area |
|-----|---------|----------|-------------|----------|---------|--------|
| 1   | 15.195  | bb       | 78.000      | 196905   | 7621    | 50.08  |
| 2   | 23.799  | bb       | 119.000     | 196261   | 4714    | 49.92  |
| Sum |         |          |             | 393165.7 | 12335.0 | 100.0  |

## Enantioenriched 3t

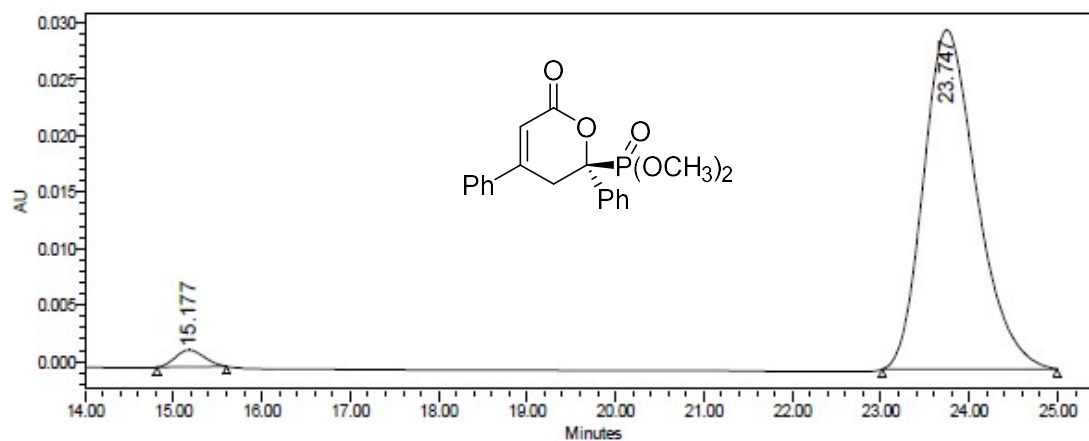

|     | RT(min) | Int Type | Width (sec) | Area      | Height  | % Area |
|-----|---------|----------|-------------|-----------|---------|--------|
| 1   | 15.177  | bb       | 47.000      | 33748     | 1488    | 2.62   |
| 2   | 23.747  | bb       | 118.500     | 1256295   | 30059   | 97.38  |
| Sum |         |          |             | 1290043.5 | 31546.7 | 100.0  |

## Racemic 3u

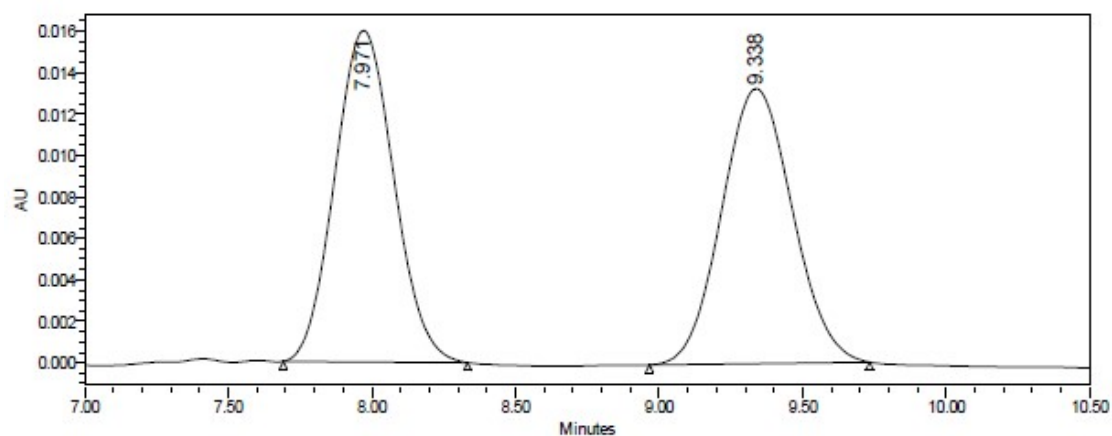

|     | RT(min) | Int Type | Width (sec) | Area     | Height  | % Area |
|-----|---------|----------|-------------|----------|---------|--------|
| 1   | 7.971   | bb       | 38.500      | 228907   | 15991   | 50.19  |
| 2   | 9.338   | bb       | 46.000      | 227138   | 13264   | 49.81  |
| Sum |         |          |             | 456045.7 | 29255.3 | 100.0  |

## Enantioenriched 3u

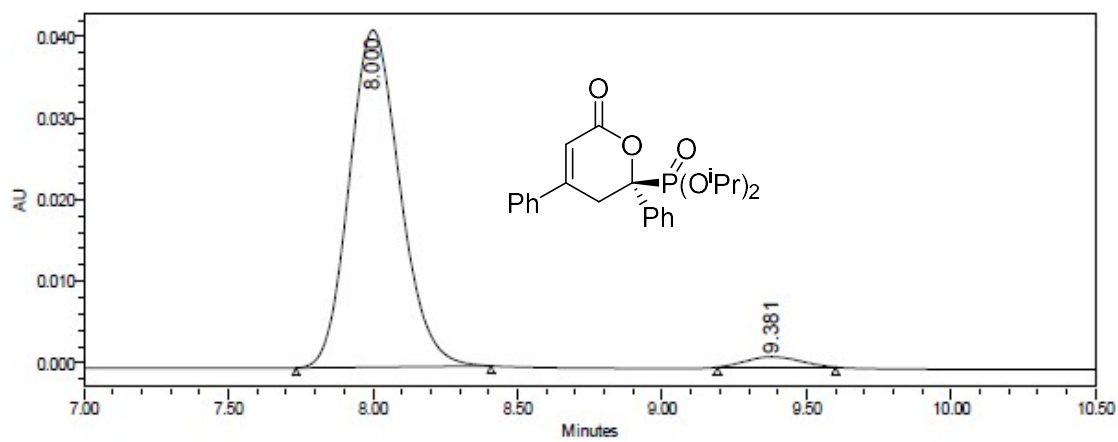

|     | RT(min) | Int Type | Width (sec) | Area     | Height  | % Area |
|-----|---------|----------|-------------|----------|---------|--------|
| 1   | 8.000   | bb       | 40.500      | 503389   | 41316   | 96.83  |
| 2   | 9.381   | bb       | 24.500      | 16496    | 1271    | 3.17   |
| Sum |         |          |             | 519885.7 | 42587.6 | 100.0  |

## Racemic 3v

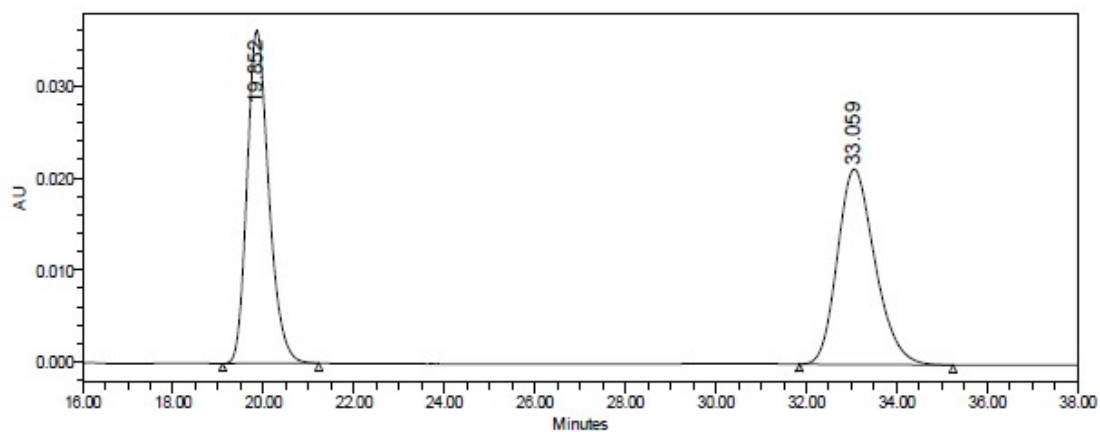

|     | RT(min) | Int Type | Width (sec) | Area      | Height  | % Area |
|-----|---------|----------|-------------|-----------|---------|--------|
| 1   | 19.852  | bb       | 127.500     | 1206278   | 36178   | 49.61  |
| 2   | 33.059  | bb       | 203.500     | 1225281   | 21253   | 50.39  |
| Sum |         |          |             | 2431559.3 | 57431.8 | 100.0  |

## Enantioenriched 3v

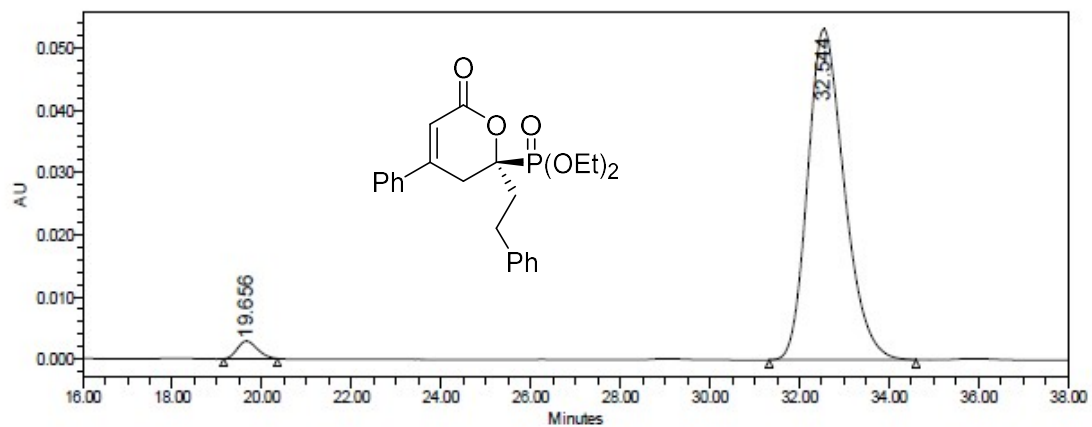

|     | RT(min) | Int Type | Width (sec) | Area      | Height  | % Area |
|-----|---------|----------|-------------|-----------|---------|--------|
| 1   | 19.656  | bb       | 72.000      | 87135     | 2824    | 2.81   |
| 2   | 32.544  | bb       | 196.500     | 3019153   | 53252   | 97.19  |
| Sum |         |          |             | 3106288.5 | 56075.9 | 100.0  |

### Racemic 3w

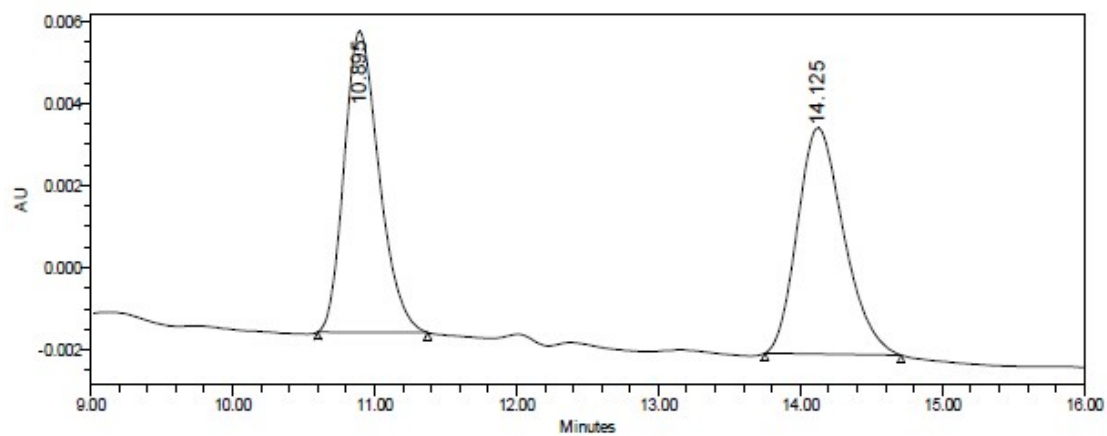

|     | RT(min) | Int Type | Width (sec) | Area     | Height  | % Area |
|-----|---------|----------|-------------|----------|---------|--------|
| 1   | 10.895  | bb       | 46.500      | 125342   | 7324    | 50.09  |
| 2   | 14.125  | bb       | 57.500      | 124907   | 5500    | 49.91  |
| Sum |         |          |             | 250249.6 | 12824.2 | 100.0  |

### Enantioenriched 3w

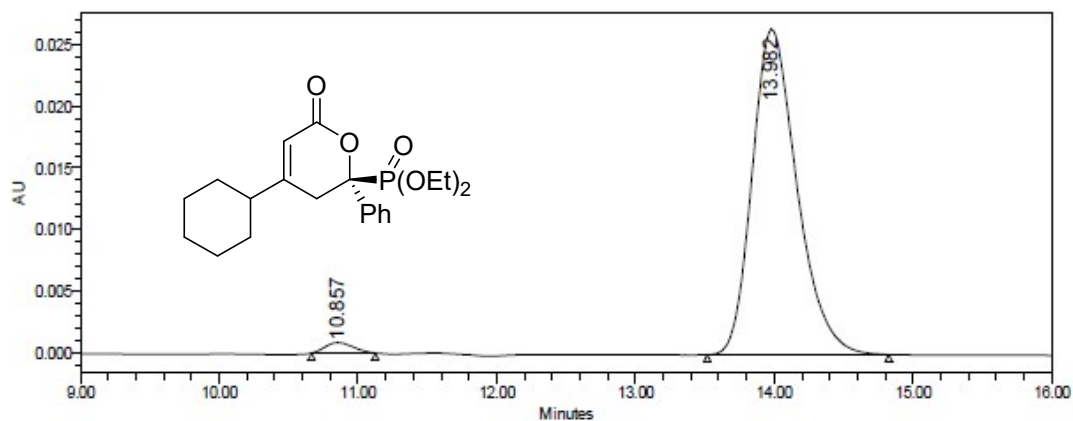

|     | RT(min) | Int Type | Width (sec) | Area     | Height  | % Area |
|-----|---------|----------|-------------|----------|---------|--------|
| 1   | 10.857  | bb       | 27.500      | 11721    | 843     | 1.93   |
| 2   | 13.982  | bb       | 78.500      | 594232   | 26431   | 98.07  |
| Sum |         |          |             | 605953.1 | 27274.0 | 100.0  |
